# Supplementary material
Source: publisher figshare collection journal article supplement (https://acs.figshare.com/ndownloader/files/17270744)
Supplement: Supplementary file 1 [file 17270744]

# **Manganese(I)-Catalyzed Transfer Hydrogenation and Acceptorless Dehydrogenative Condensation: Promotional Influence of the Uncoordinated N-Heterocycle**

Chong Zhang,<sup>†</sup> Bowen Hu,<sup>†</sup> Dafa Chen<sup>\*,†</sup> and Haiping Xia<sup>‡</sup>

<sup>†</sup>MIIT Key Laboratory of Critical Materials Technology for New Energy Conversion and Storage, School of Chemical Engineering & Technology, Harbin Institute of Technology, Harbin 150001, China.

<sup>‡</sup>Shenzhen Grubbs Institute, Department of Chemistry, Southern University of Science and Technology, Shenzhen, China.

E-mail for D. C.: dafachen@hit.edu.cn.

## Table of Contents

|                                               |     |
|-----------------------------------------------|-----|
| Crystallographic Details                      | S2  |
| Scheme S1: Synthesis of <b>L</b> <sub>3</sub> | S2  |
| <sup>1</sup> H NMR spectra                    | S3  |
| <sup>13</sup> C NMR spectra                   | S47 |
| IR Spectra                                    | S87 |

## Crystallographic Details

**3:** A total of 11725 reflections ( $-10 \leq h \leq 10$ ,  $-11 \leq k \leq 11$ ,  $-12 \leq l \leq 12$ ) were collected at  $T = 173(2)$  K in the range of  $2.308$  to  $24.997^\circ$  of which 3104 were unique ( $R_{\text{int}} = 0.0340$ );  $\text{MoK}$  radiation ( $\lambda = 0.71073 \text{ \AA}$ ). The structure was solved by the direct methods. All non-hydrogen atoms were refined anisotropically, and hydrogen atoms were placed in calculated idealized positions. The residual peak and hole electron densities were  $0.301$  and  $-0.268 \text{ e\AA}^{-3}$ , respectively. The least squares refinement converged normally with residuals of  $R(F) = 0.0232$ ,  $wR(F^2) = 0.0512$  and a GOF =  $1.031$  ( $>2\sigma(I)$ ).  $\text{C}_{17}\text{H}_{13}\text{BrMnN}_3\text{O}_5$ , Mw =  $474.15$ , space group P-1, triclinic,  $a = 8.9986(4)$ ,  $b = 10.0301(4)$ ,  $c = 10.1404(4) \text{ \AA}$ ,  $V = 894.28(6) \text{ \AA}^3$ ,  $Z = 2$ ,  $\rho_{\text{calcd}} = 1.761 \text{ Mg/m}^3$ . CCDC-1939902 contains the supplementary crystallographic data for this paper. These data can be obtained free of charge from The Cambridge Crystallographic Data Centre via [www.ccdc.cam.ac.uk/data\\_request/cif](http://www.ccdc.cam.ac.uk/data_request/cif).

### Scheme S1. Synthesis of **L**<sub>3</sub>

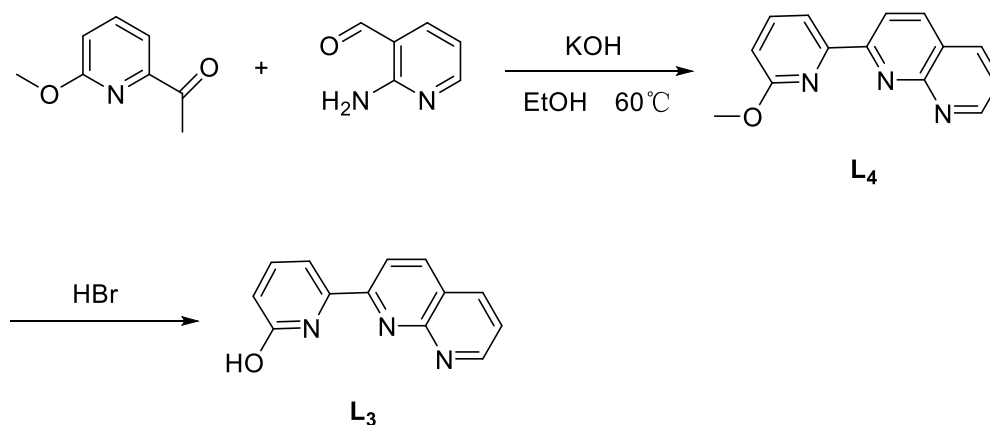

## <sup>1</sup>H NMR Spectra

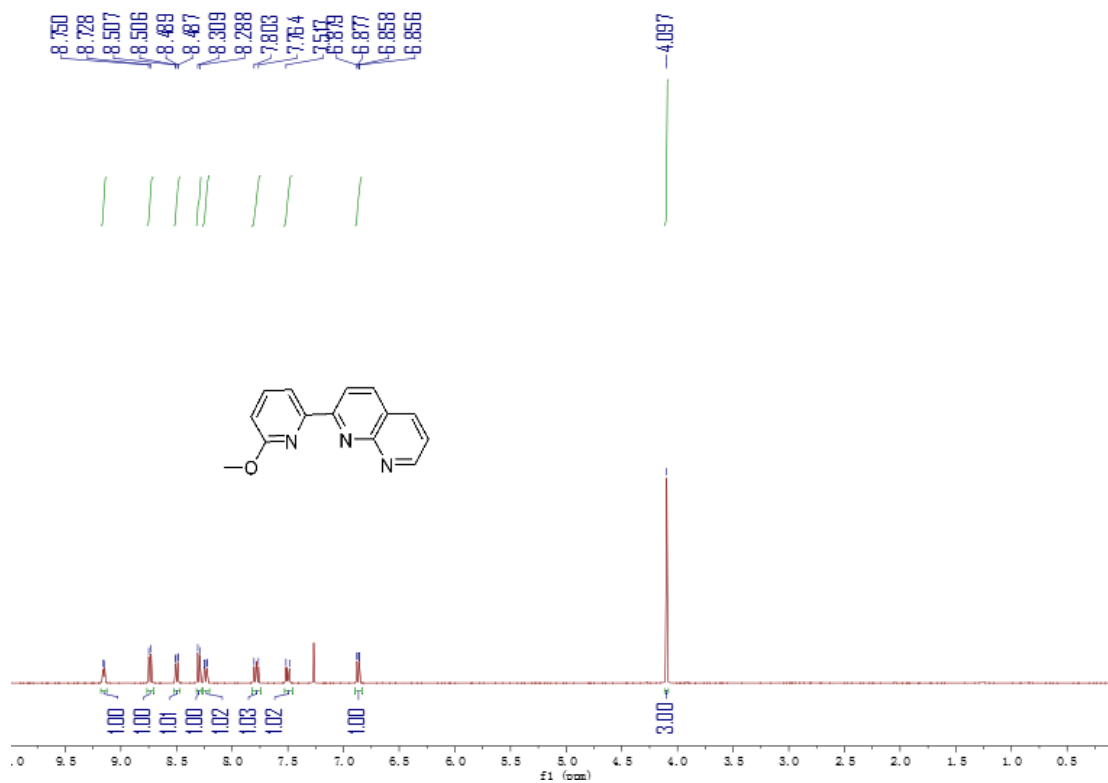

Figure S1. <sup>1</sup>H NMR spectrum of 2-(6-methoxypyridin-2-yl)-1,8-naphthyridine in CDCl<sub>3</sub>.

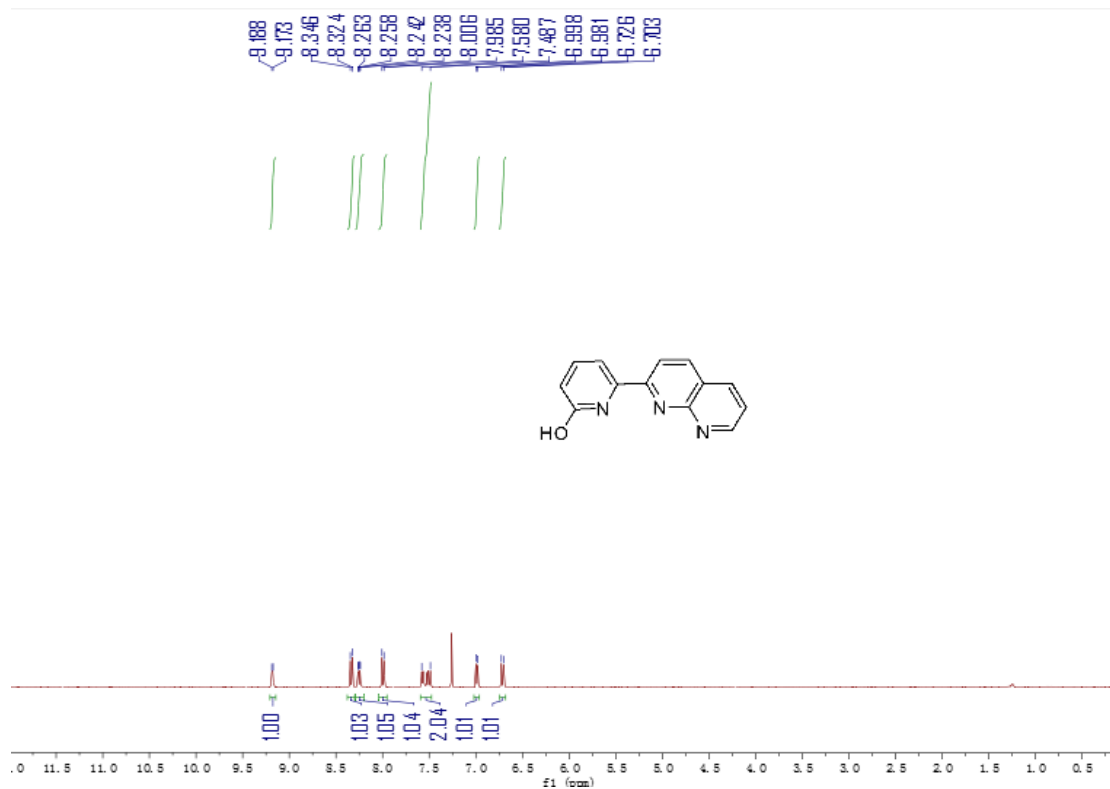

Figure S2. <sup>1</sup>H NMR spectrum of 6-(1,8-naphthyridin-2-yl)pyridin-2-ol in CDCl<sub>3</sub>.

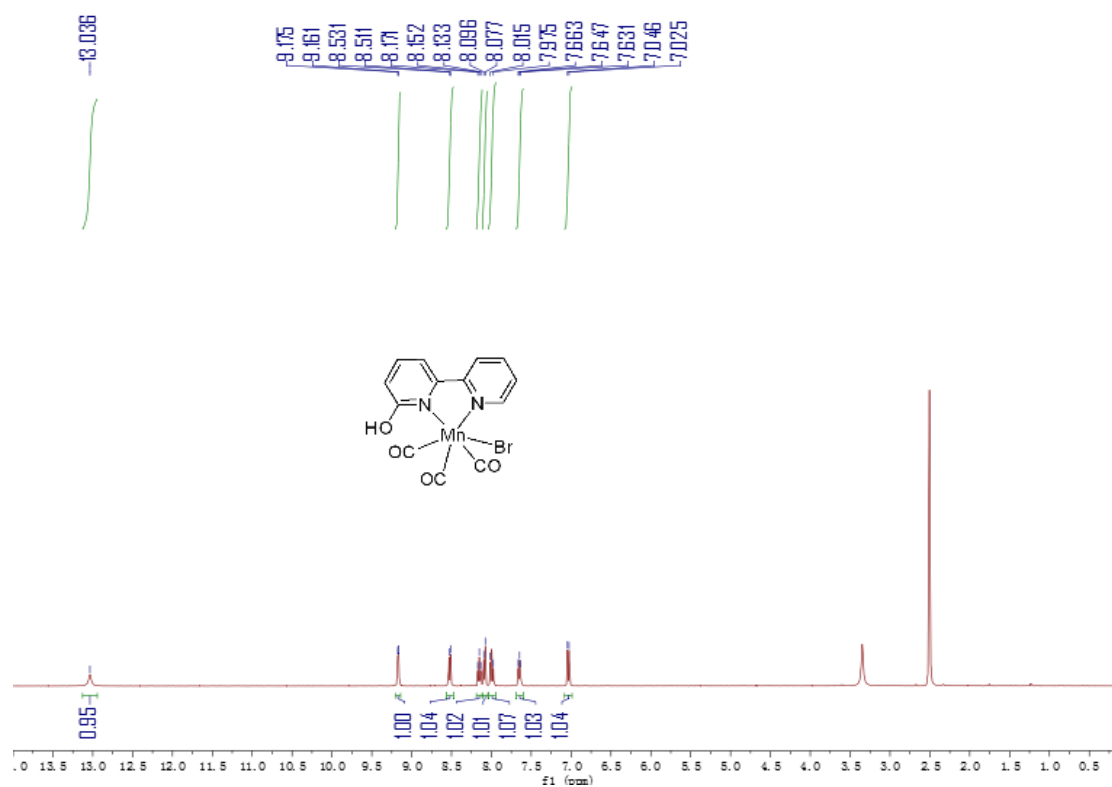

Figure S3. <sup>1</sup>H NMR spectrum of **1** in d<sub>6</sub>-DMSO.

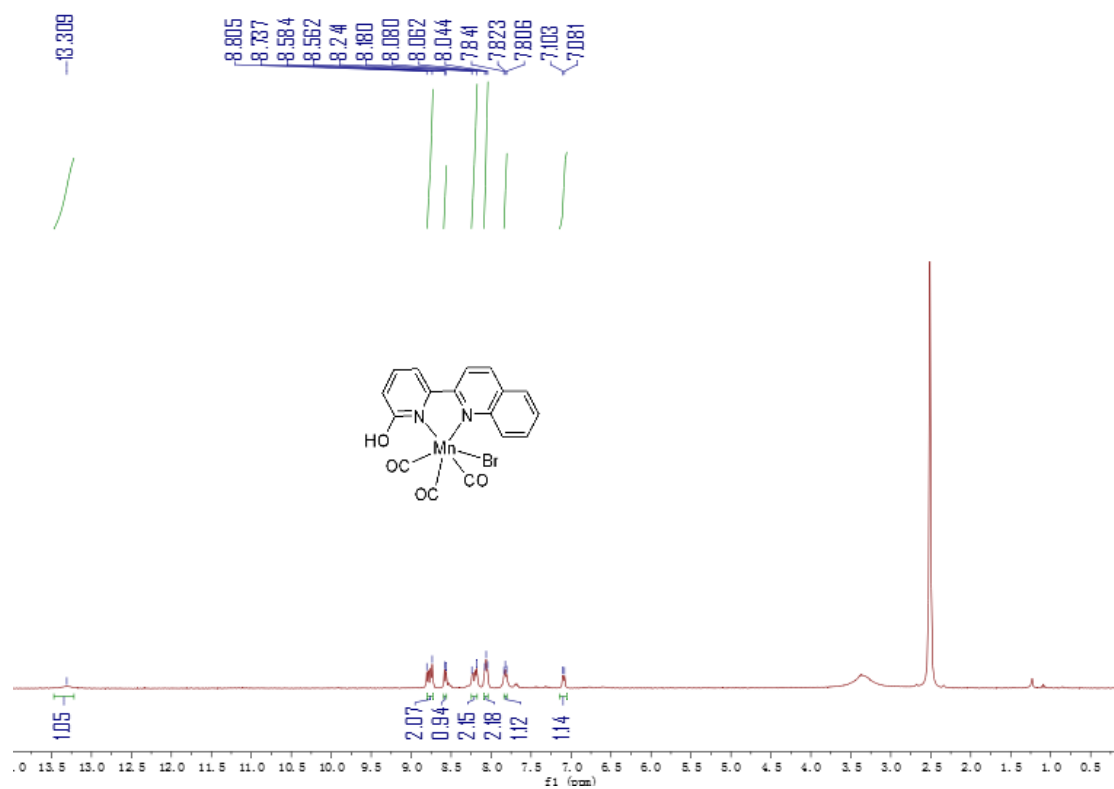

Figure S4. <sup>1</sup>H NMR spectrum of **2** in d<sub>6</sub>-DMSO.

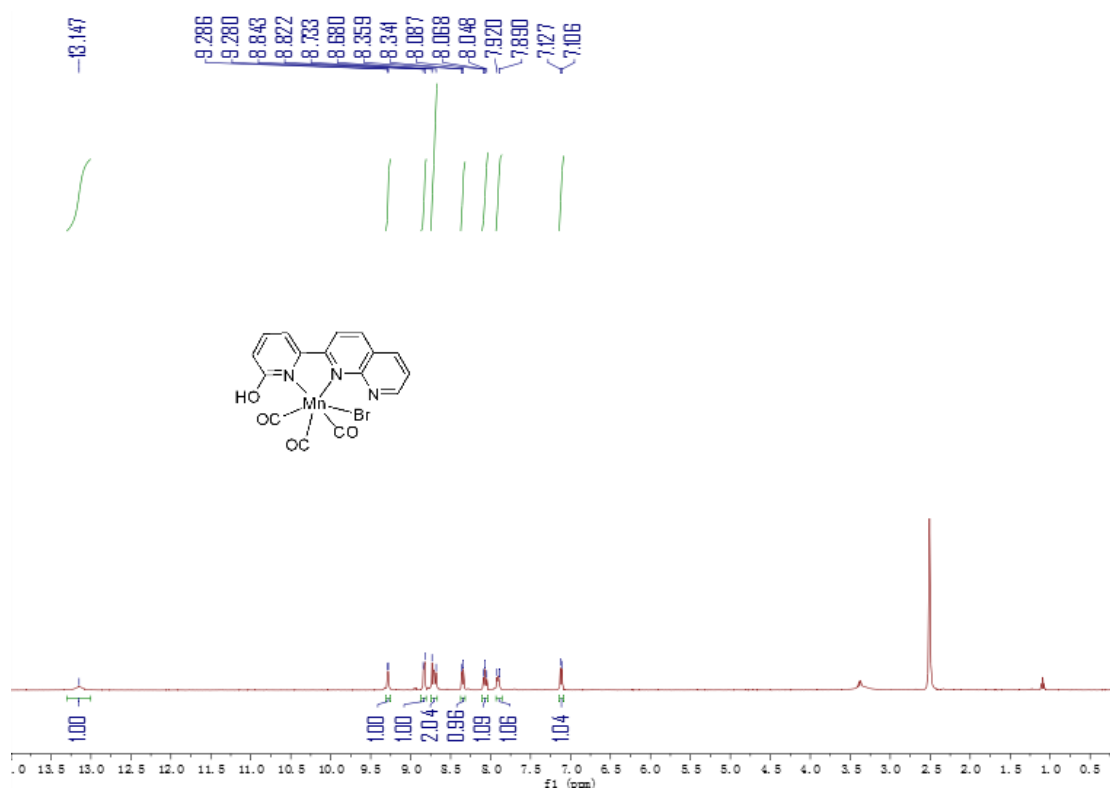

Figure S5.  $^1\text{H}$  NMR spectrum of **3** in  $\text{d}_6\text{-DMSO}$ .

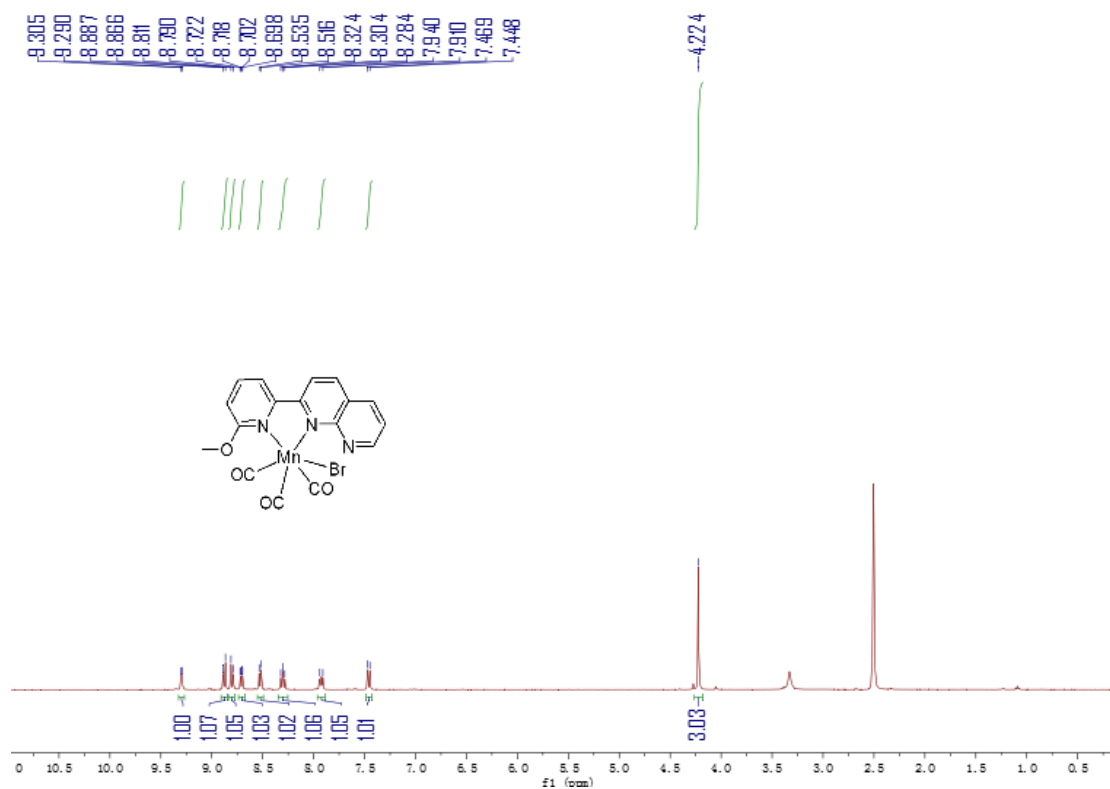

Figure S6. <sup>1</sup>H NMR spectrum of **4** in d<sub>6</sub>-DMSO.



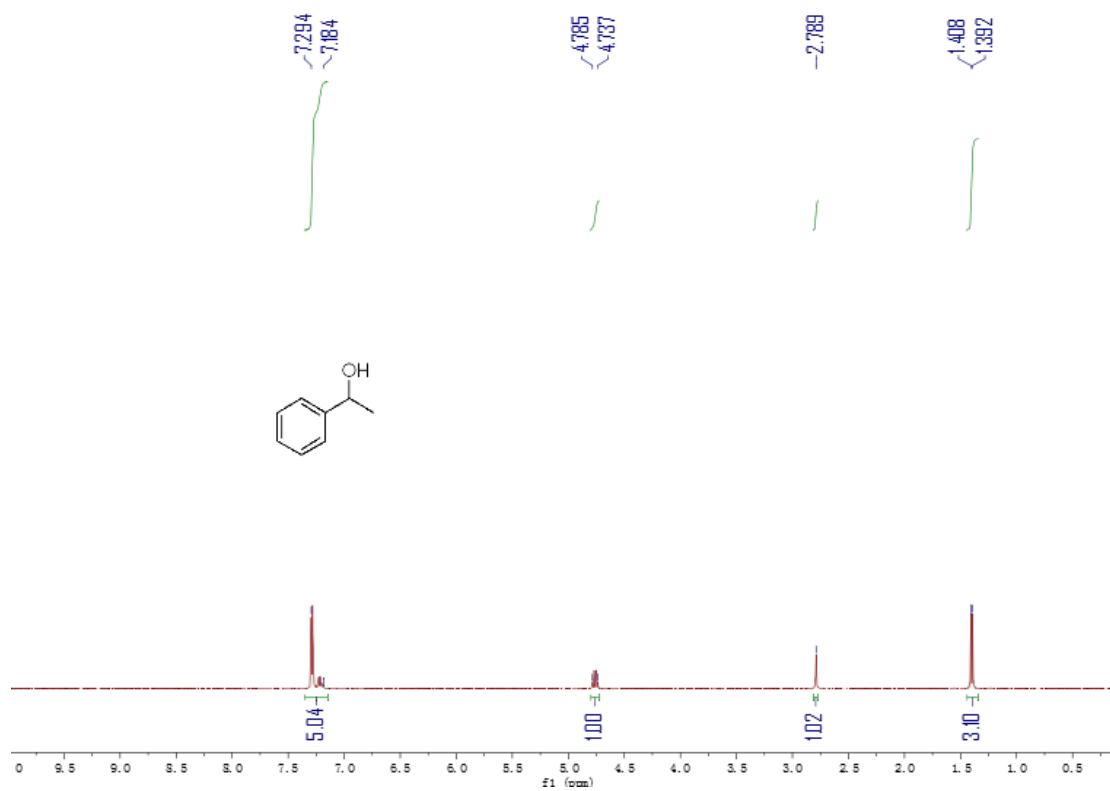

Figure S7.  $^1\text{H}$  NMR spectrum of 1-phenylethan-1-ol in  $\text{CDCl}_3$ .

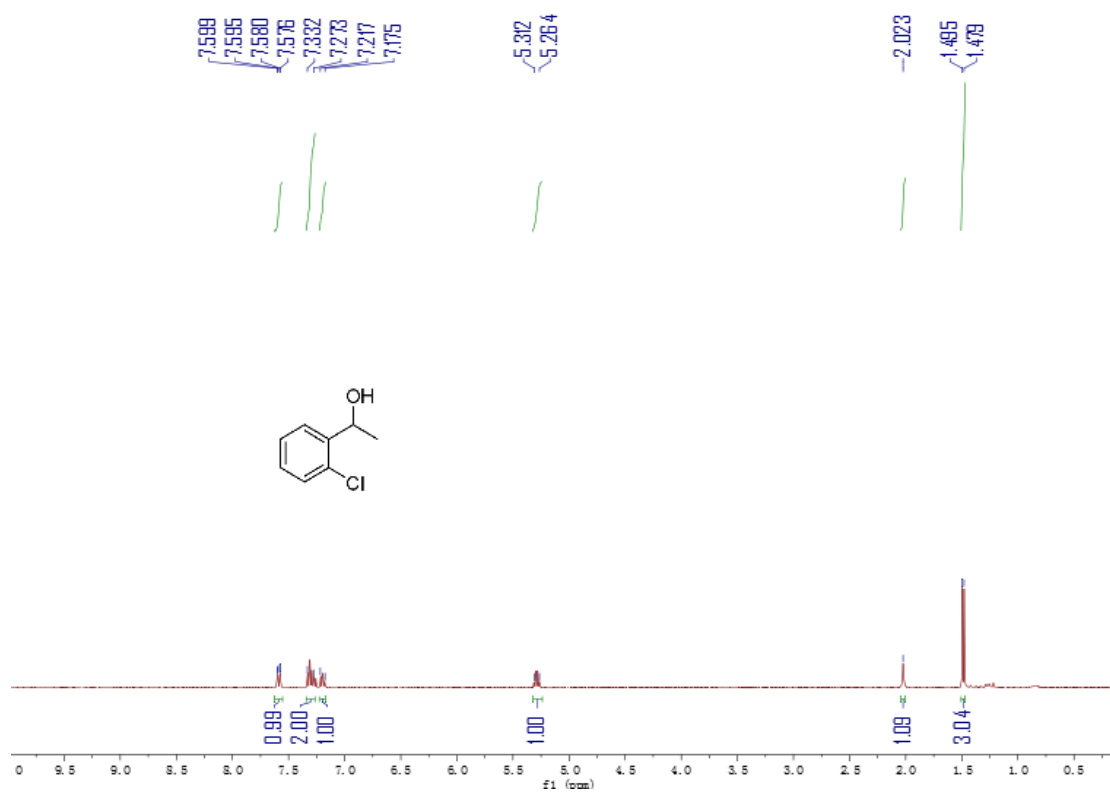

Figure S8. <sup>1</sup>H NMR spectrum of 1-(2-chlorophenyl)ethan-1-ol in CDCl<sub>3</sub>.

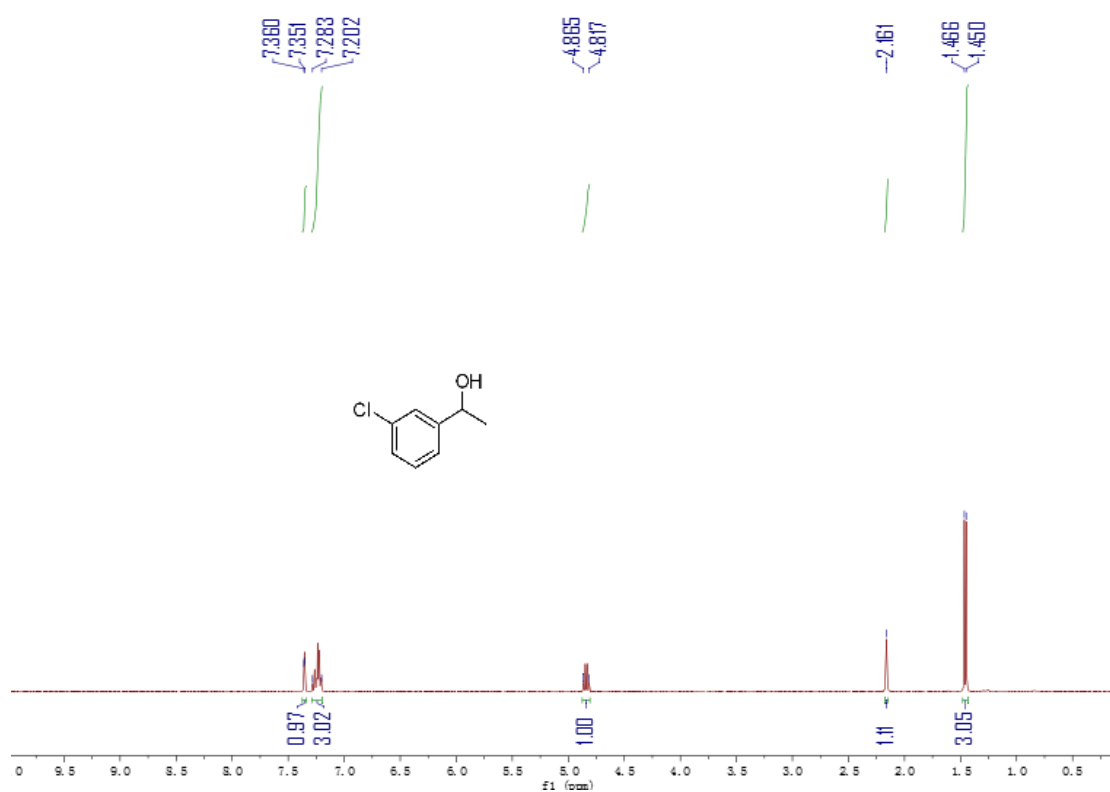

Figure S9.  $^1\text{H}$  NMR spectrum of 1-(3-chlorophenyl)ethan-1-ol in  $\text{CDCl}_3$ .

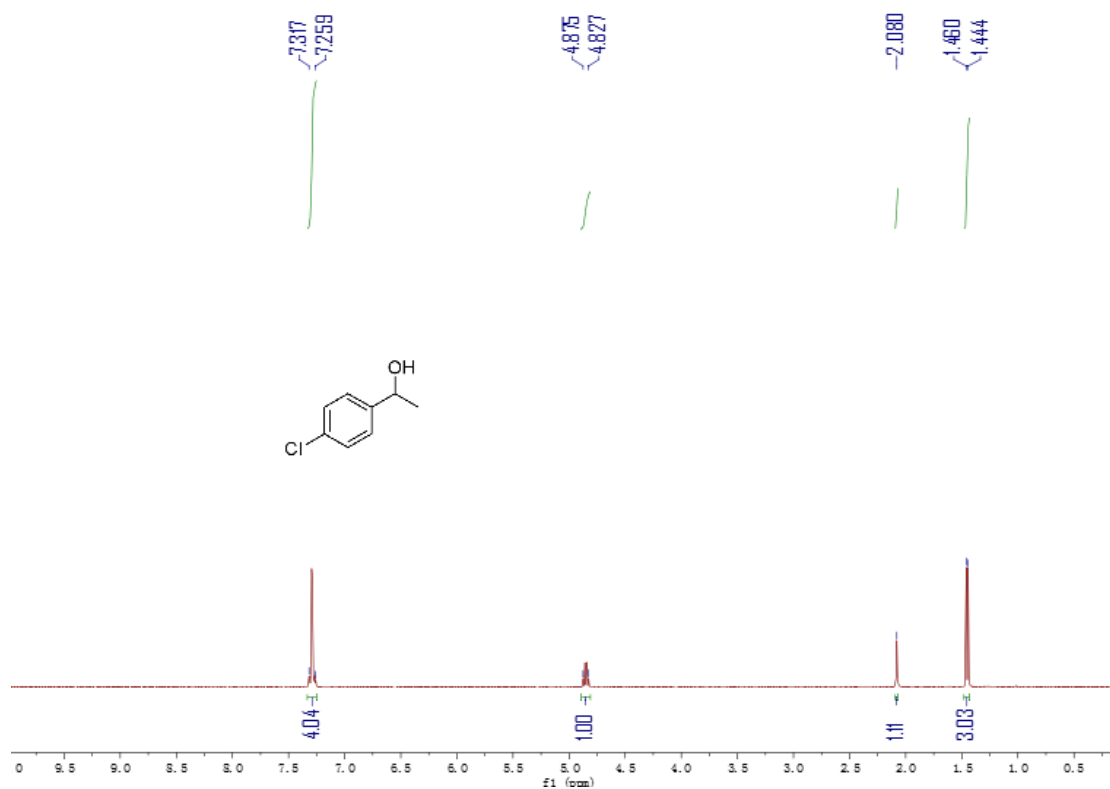

Figure S10.  $^1\text{H}$  NMR spectrum of 1-(4-chlorophenyl)ethan-1-ol in  $\text{CDCl}_3$ .

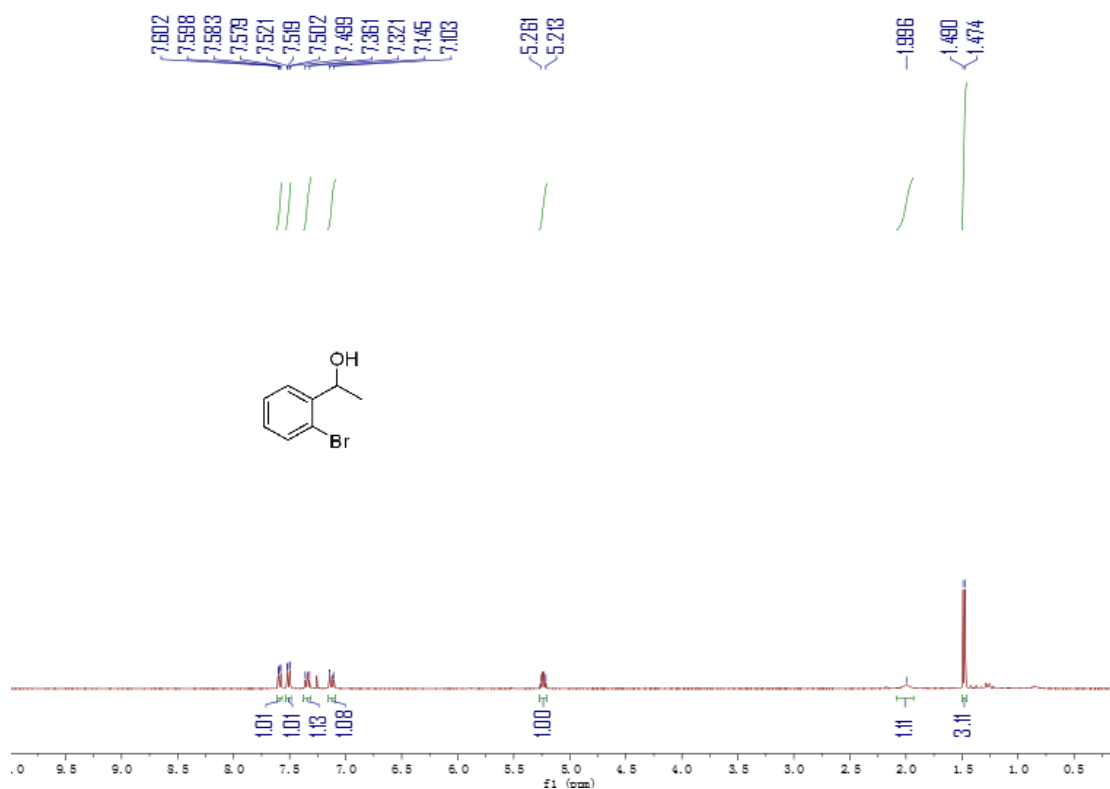

Figure S11. <sup>1</sup>H NMR spectrum of 1-(2-bromophenyl)ethan-1-ol in CDCl<sub>3</sub>.

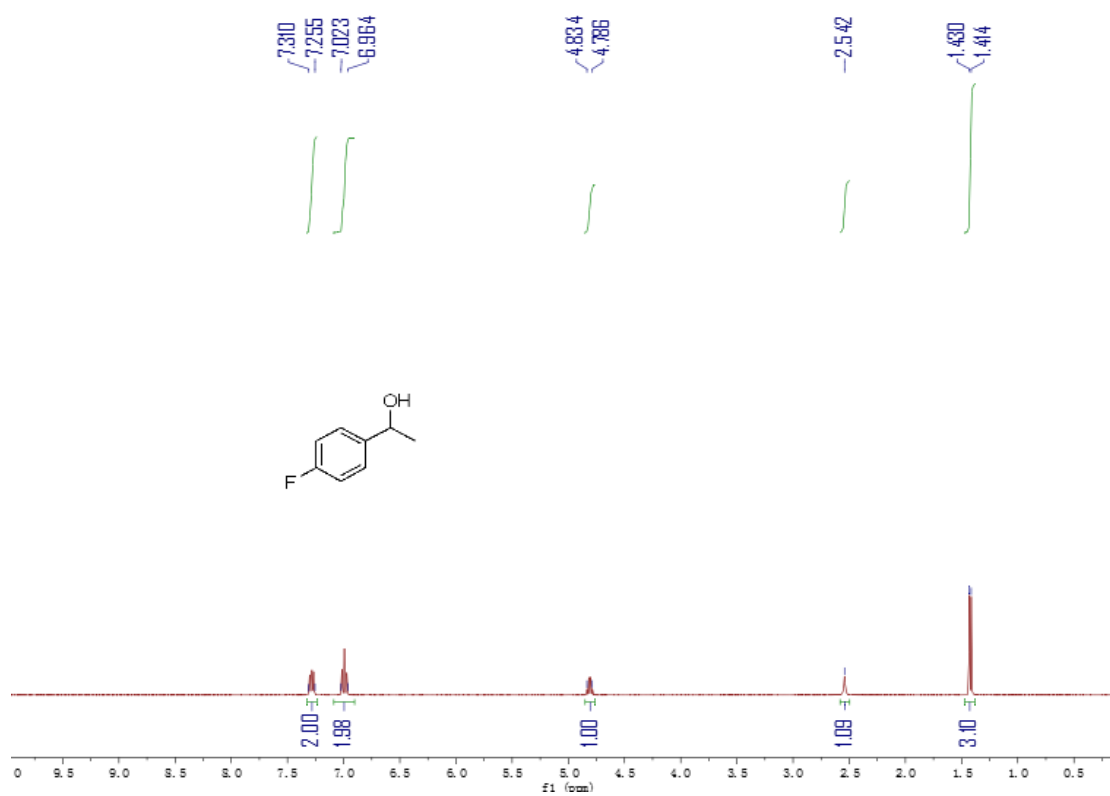

Figure S12. <sup>1</sup>H NMR spectrum of 1-(4-fluorophenyl)ethan-1-ol in CDCl<sub>3</sub>.

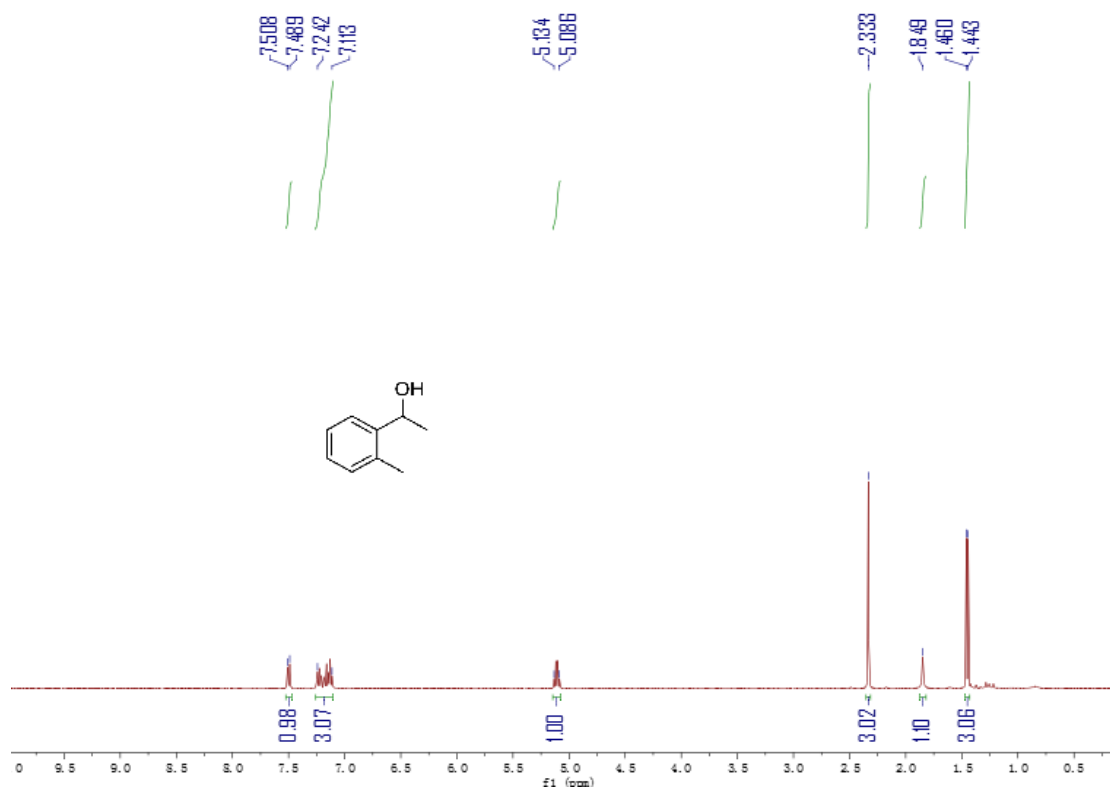

Figure S13.  $^1\text{H}$  NMR spectrum of 1-(o-tolyl)ethan-1-ol in  $\text{CDCl}_3$ .

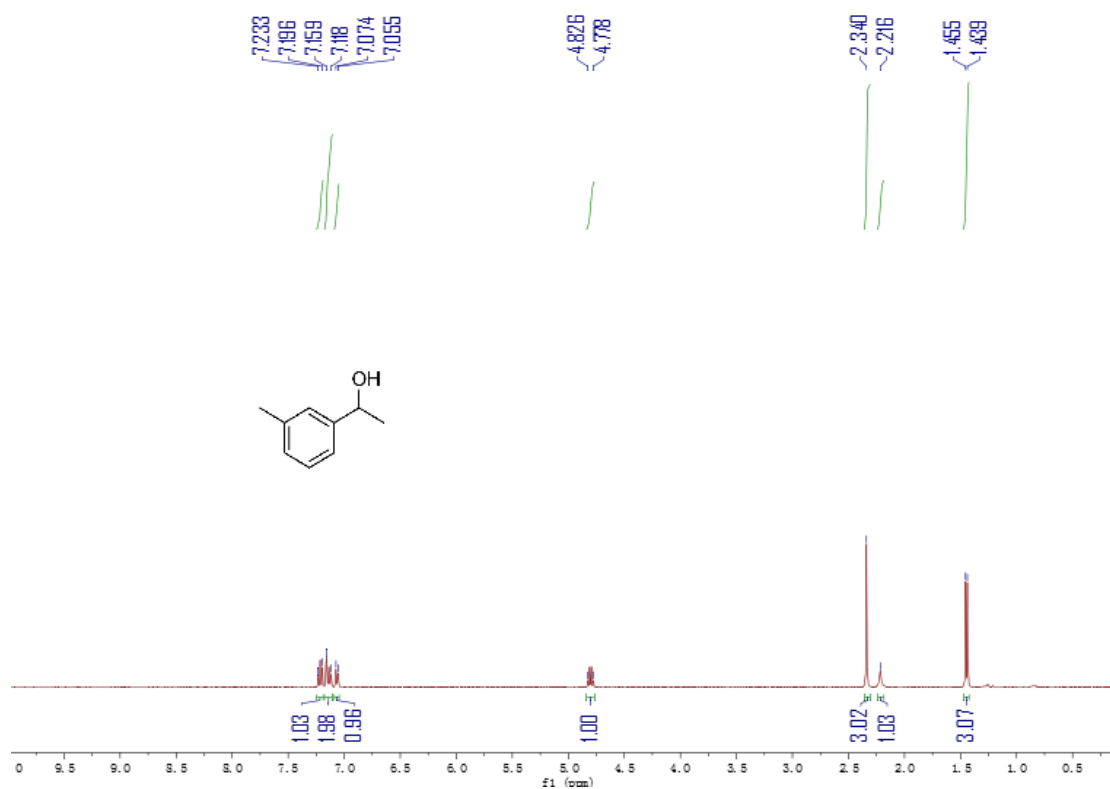

Figure S14. <sup>1</sup>H NMR spectrum of 1-(m-tolyl)ethan-1-ol in CDCl<sub>3</sub>.



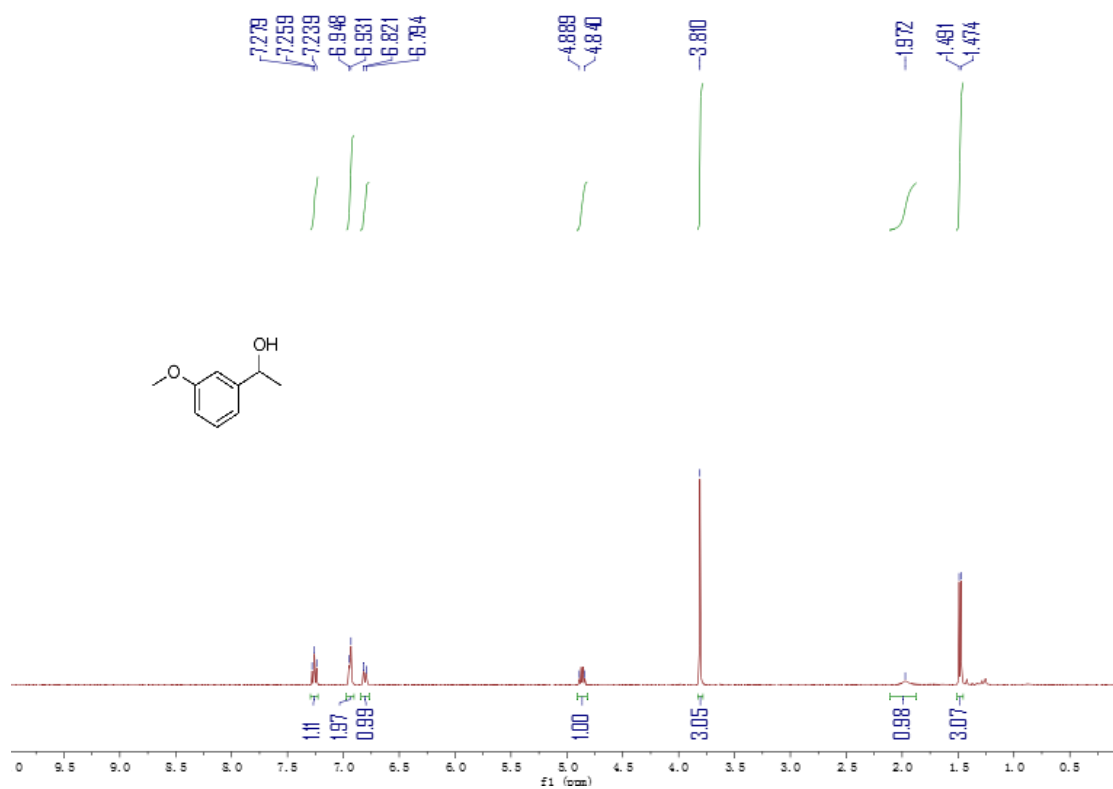

Figure S15.  $^1\text{H}$  NMR spectrum of 1-(3-methoxyphenyl)ethan-1-ol in  $\text{CDCl}_3$ .

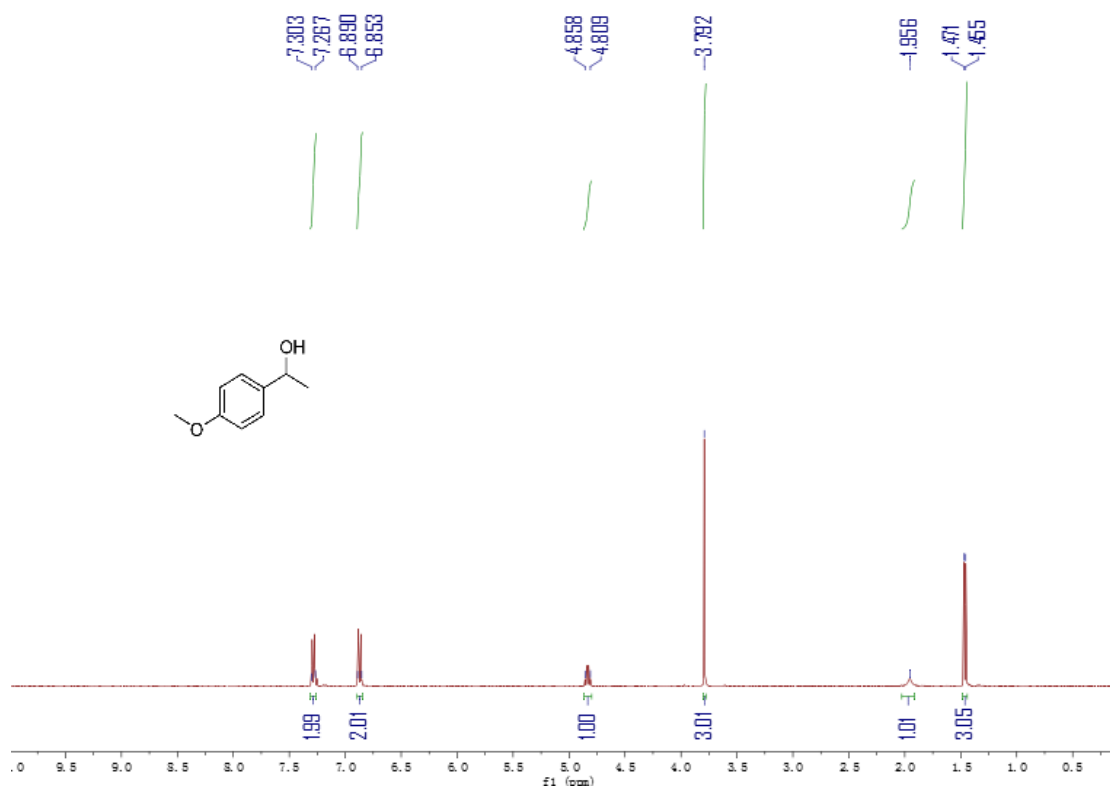

Figure S16.  $^1\text{H}$  NMR spectrum of 1-(4-methoxyphenyl)ethan-1-ol in  $\text{CDCl}_3$ .

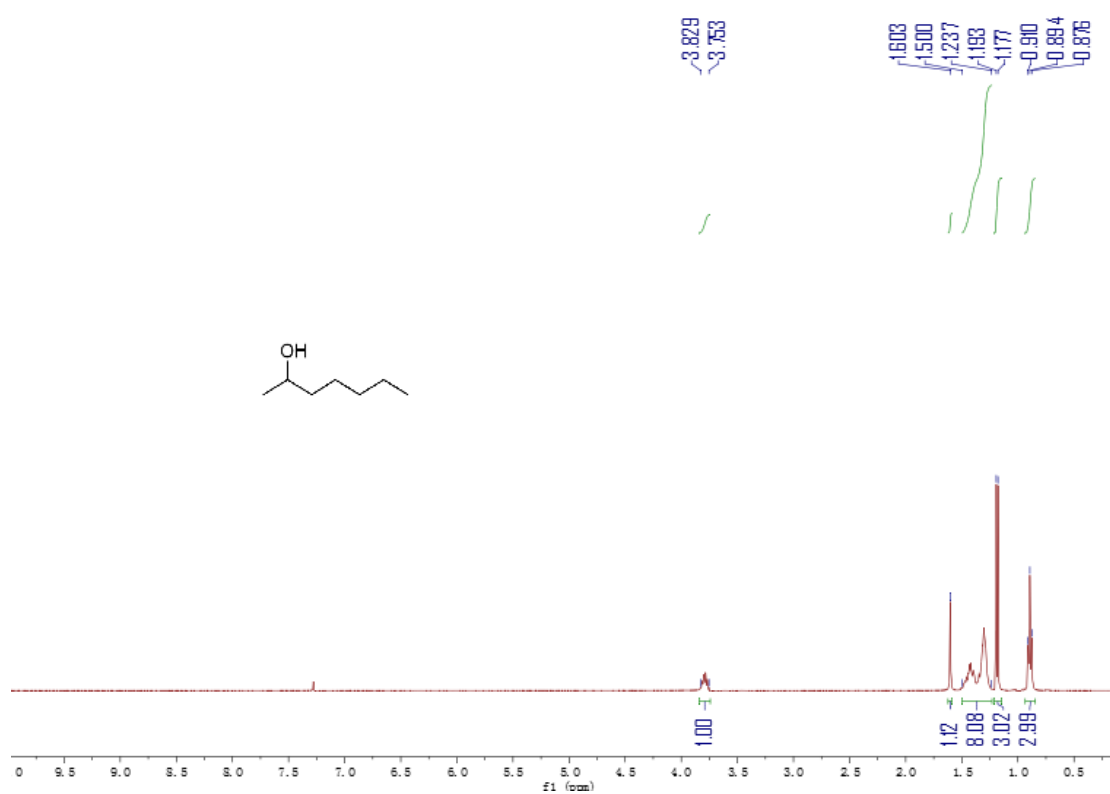

Figure S17. <sup>1</sup>H NMR spectrum of heptan-2-ol in CDCl<sub>3</sub>.

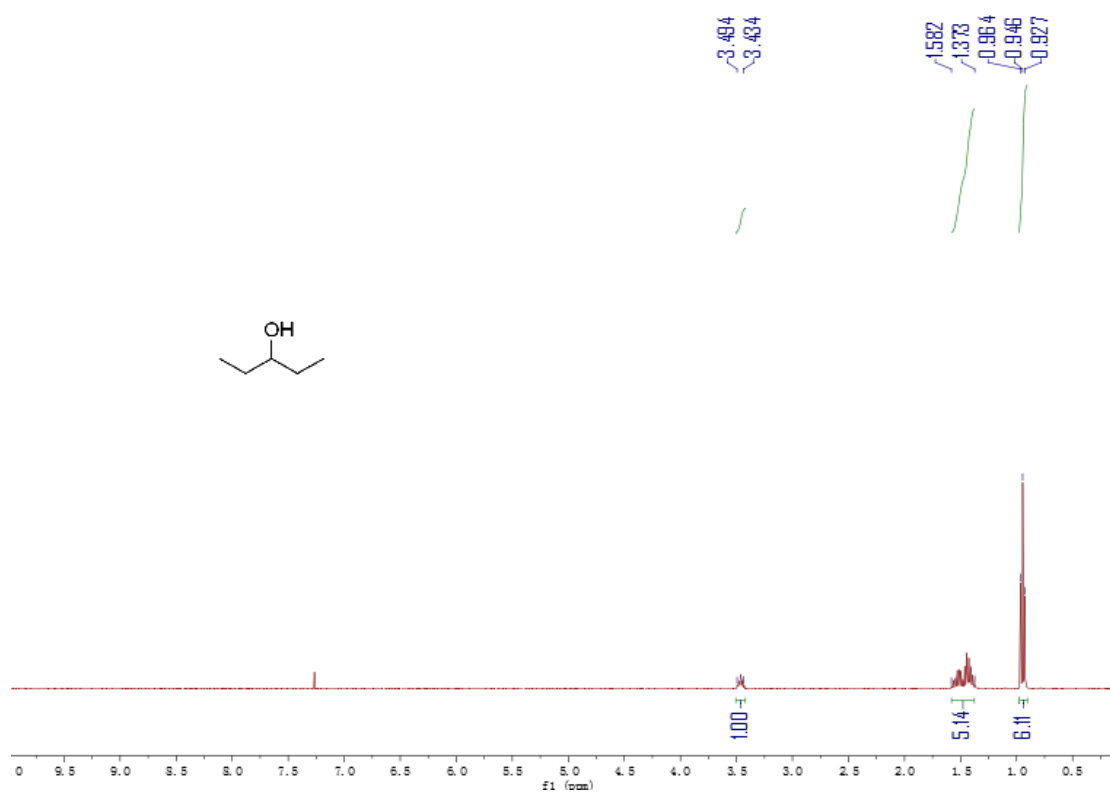

Figure S18. <sup>1</sup>H NMR spectrum of pentan-3-ol in CDCl<sub>3</sub>.

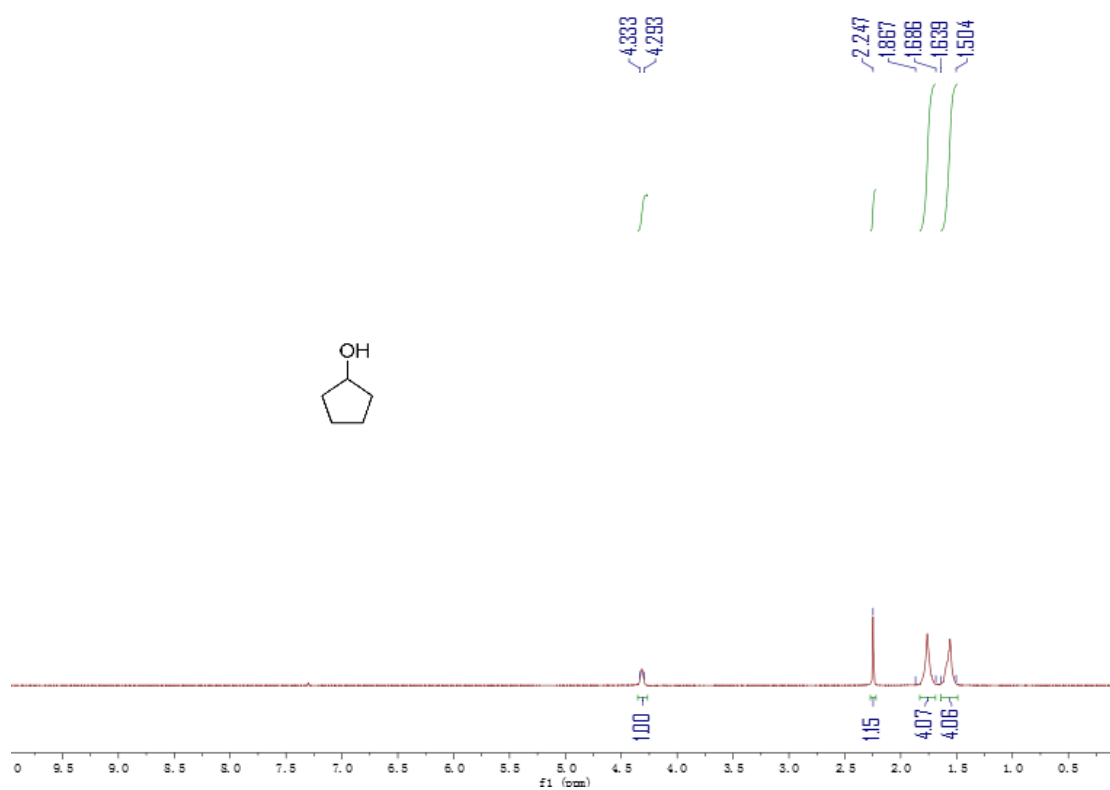

Figure S19. <sup>1</sup>H NMR spectrum of cyclopentanol in CDCl<sub>3</sub>.

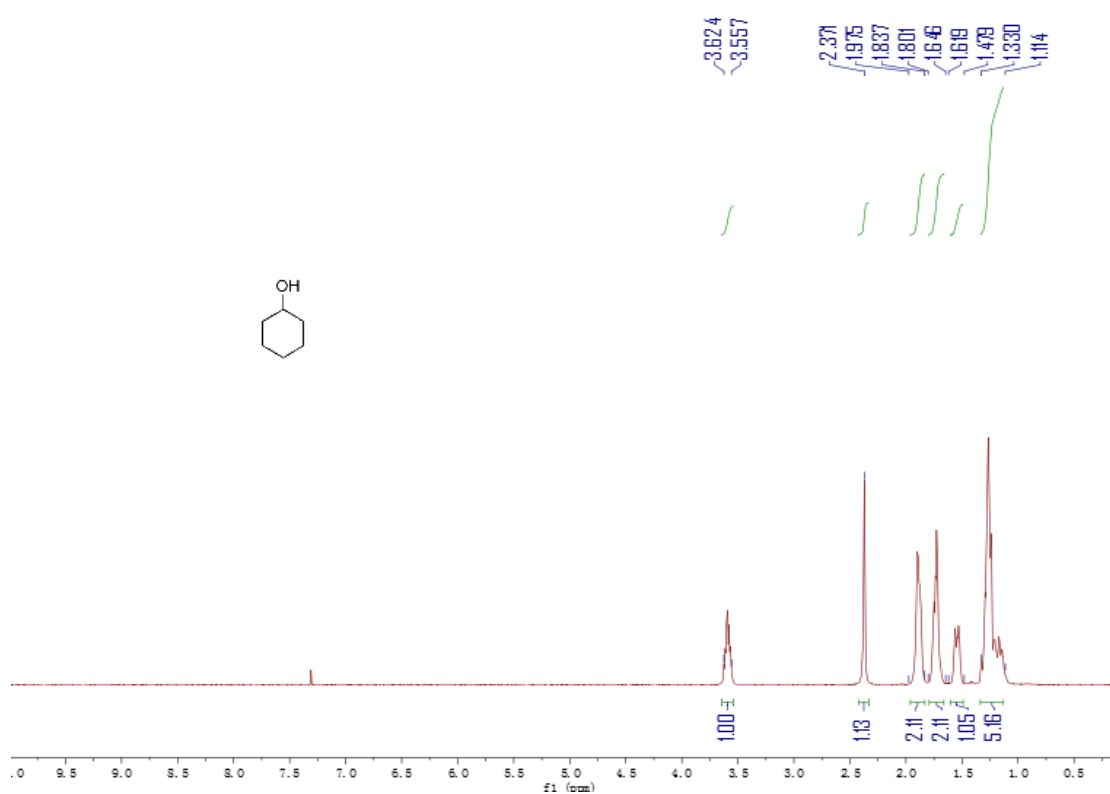

Figure S20. <sup>1</sup>H NMR spectrum of cyclohexanol in CDCl<sub>3</sub>.

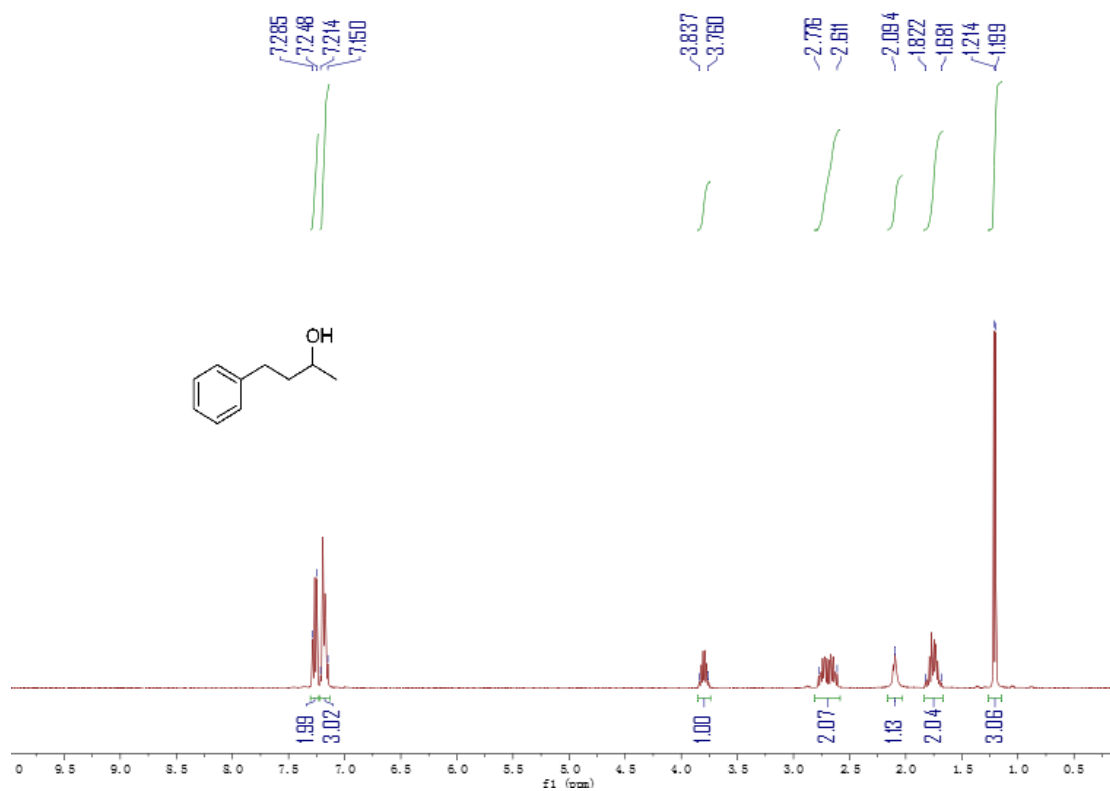

Figure S21. <sup>1</sup>H NMR spectrum of 4-phenylbutan-2-ol in CDCl<sub>3</sub>.

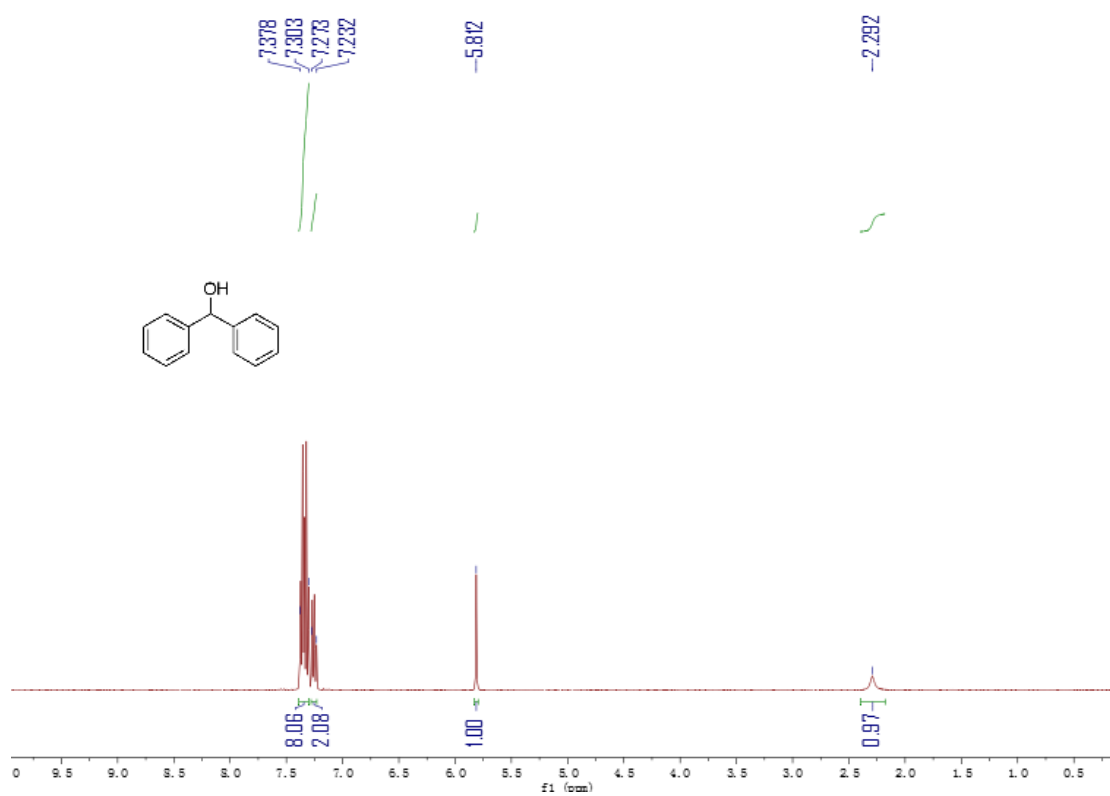

Figure S22. <sup>1</sup>H NMR spectrum of diphenylmethanol in CDCl<sub>3</sub>.



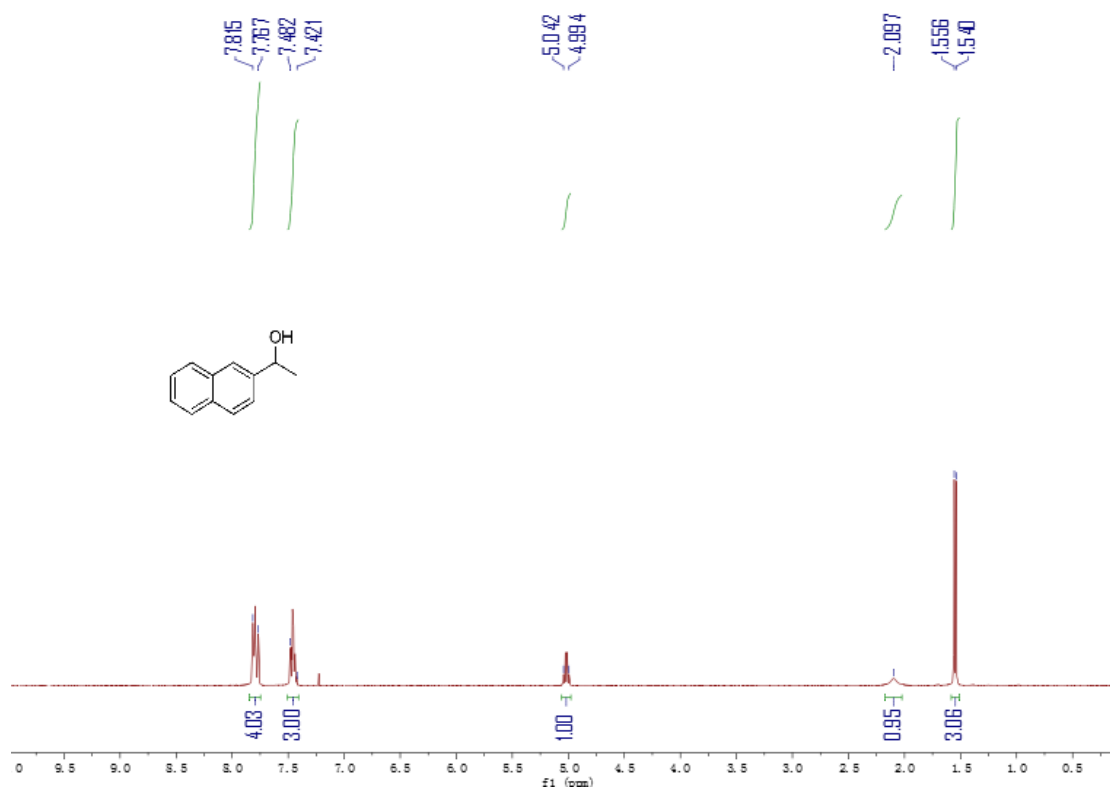

Figure S23. <sup>1</sup>H NMR spectrum of 1-(naphthalen-2-yl)ethan-1-ol in CDCl<sub>3</sub>.

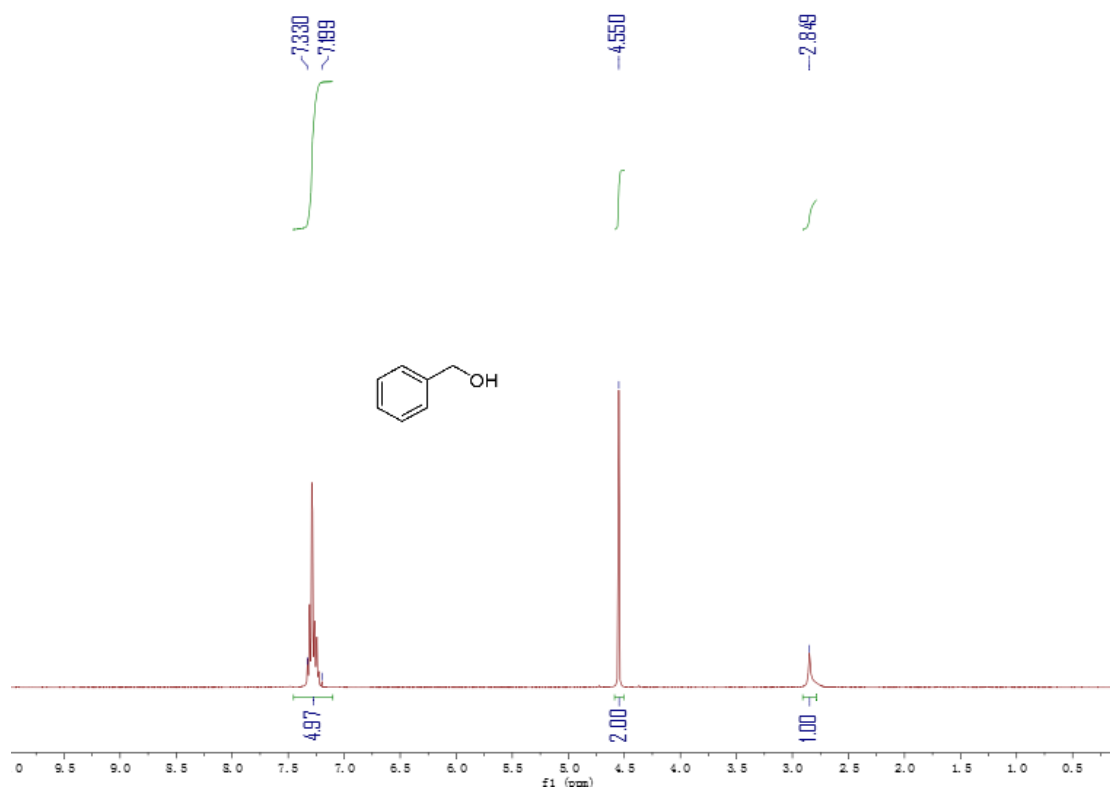

Figure S24.  $^1\text{H}$  NMR spectrum of phenylmethanol in  $\text{CDCl}_3$ .

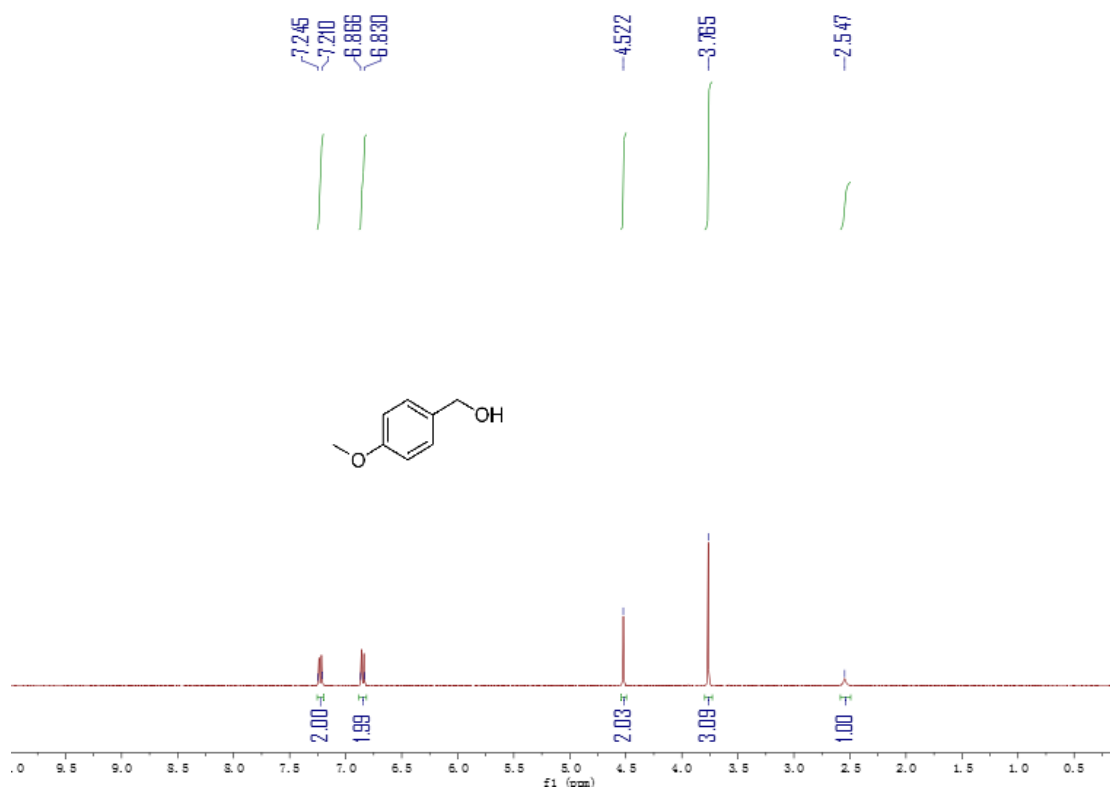

Figure S25. <sup>1</sup>H NMR spectrum of (4-methoxyphenyl)methanol in CDCl<sub>3</sub>.

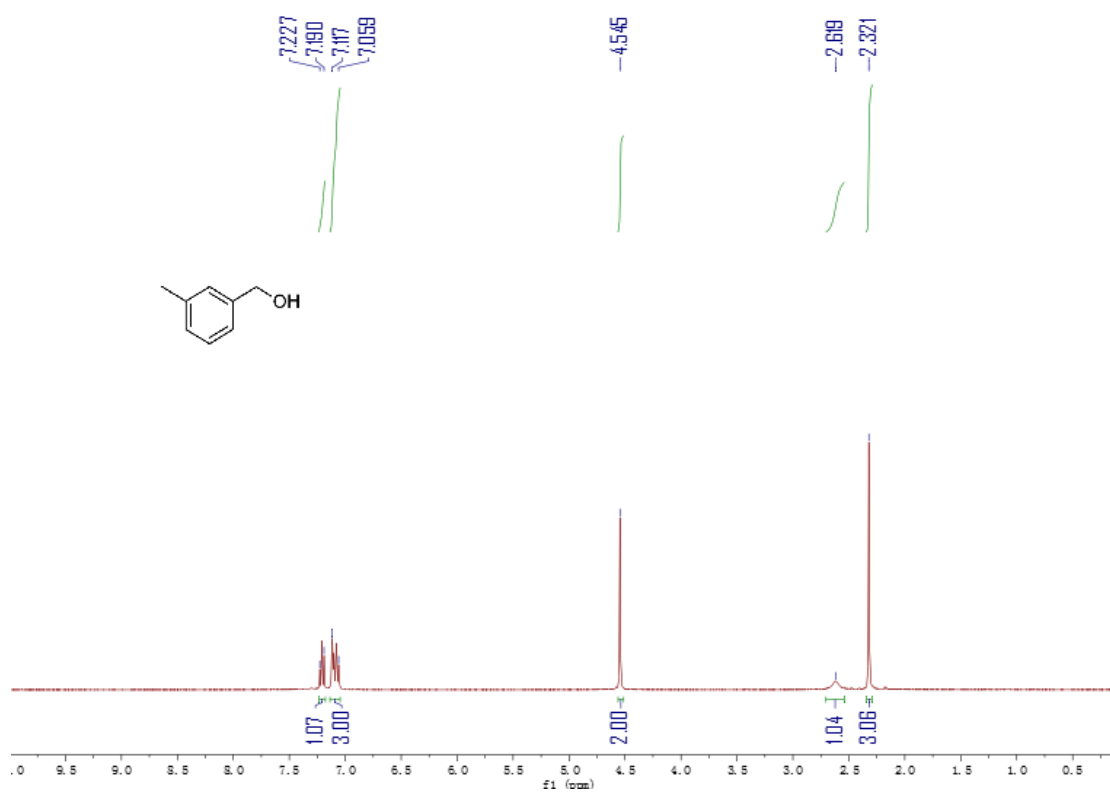

Figure S26. <sup>1</sup>H NMR spectrum of m-tolylmethanol in CDCl<sub>3</sub>.

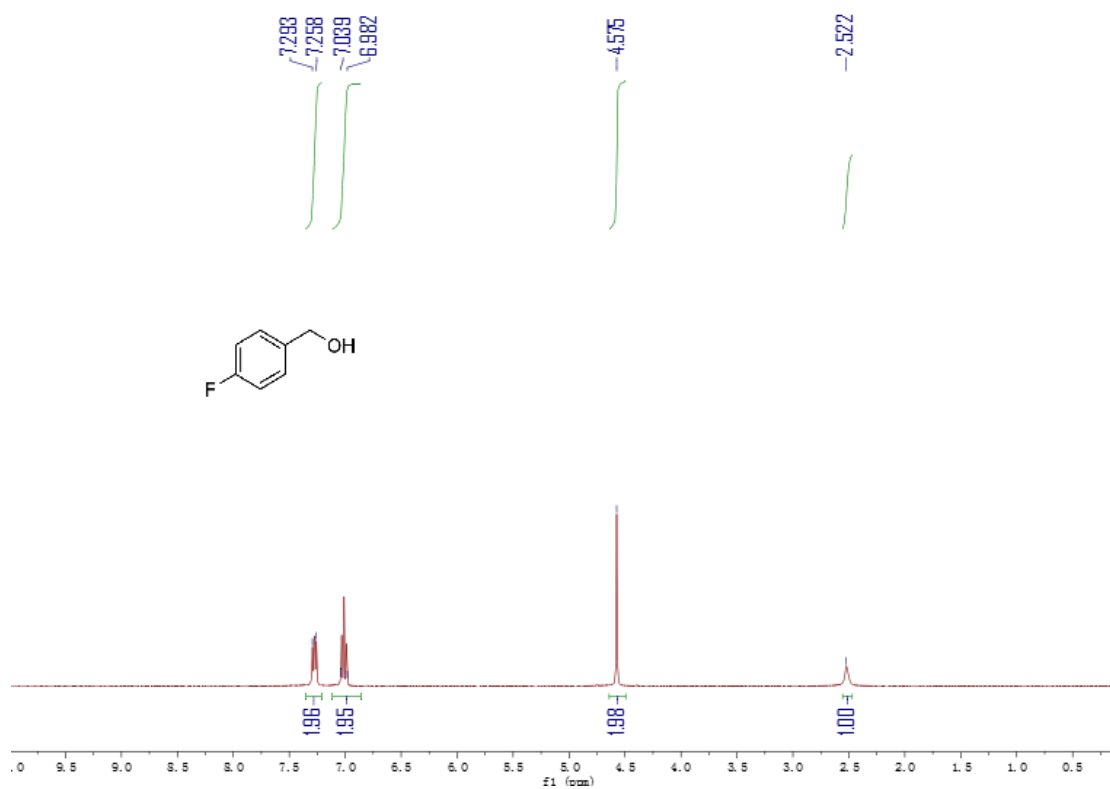

Figure S27. <sup>1</sup>H NMR spectrum of (4-fluorophenyl)methanol in CDCl<sub>3</sub>.

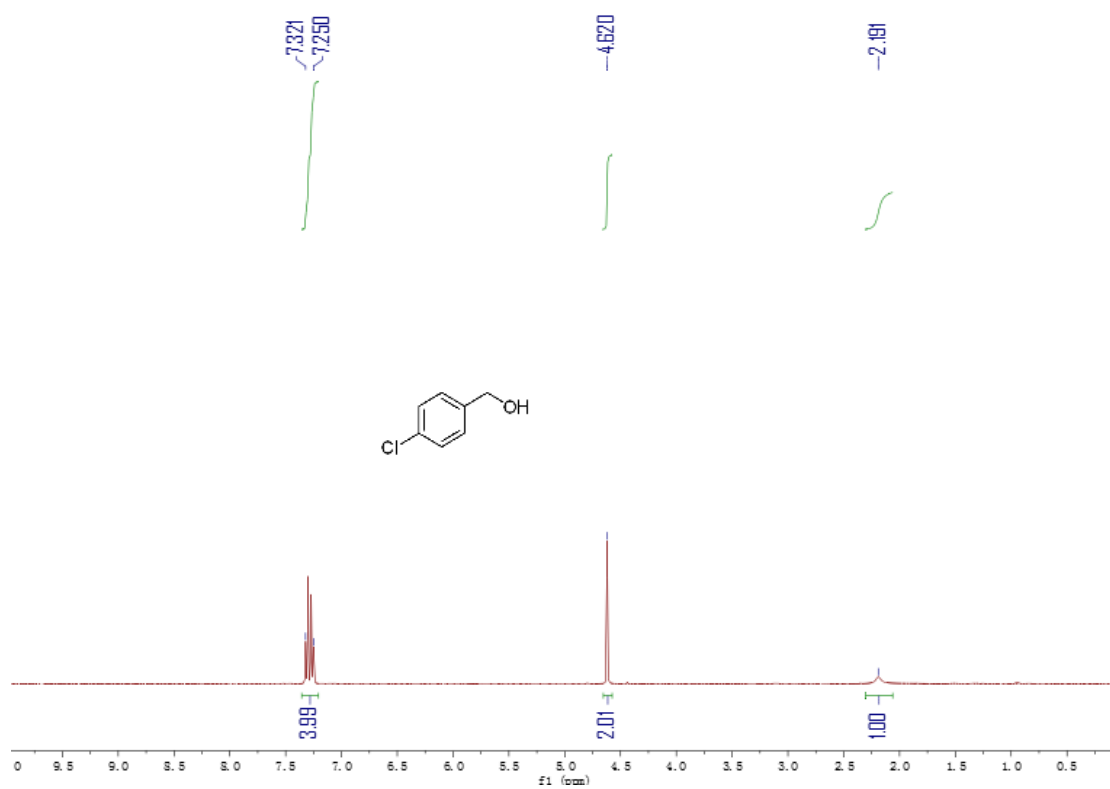

Figure S28.  $^1\text{H}$  NMR spectrum of (4-chlorophenyl)methanol in  $\text{CDCl}_3$ .

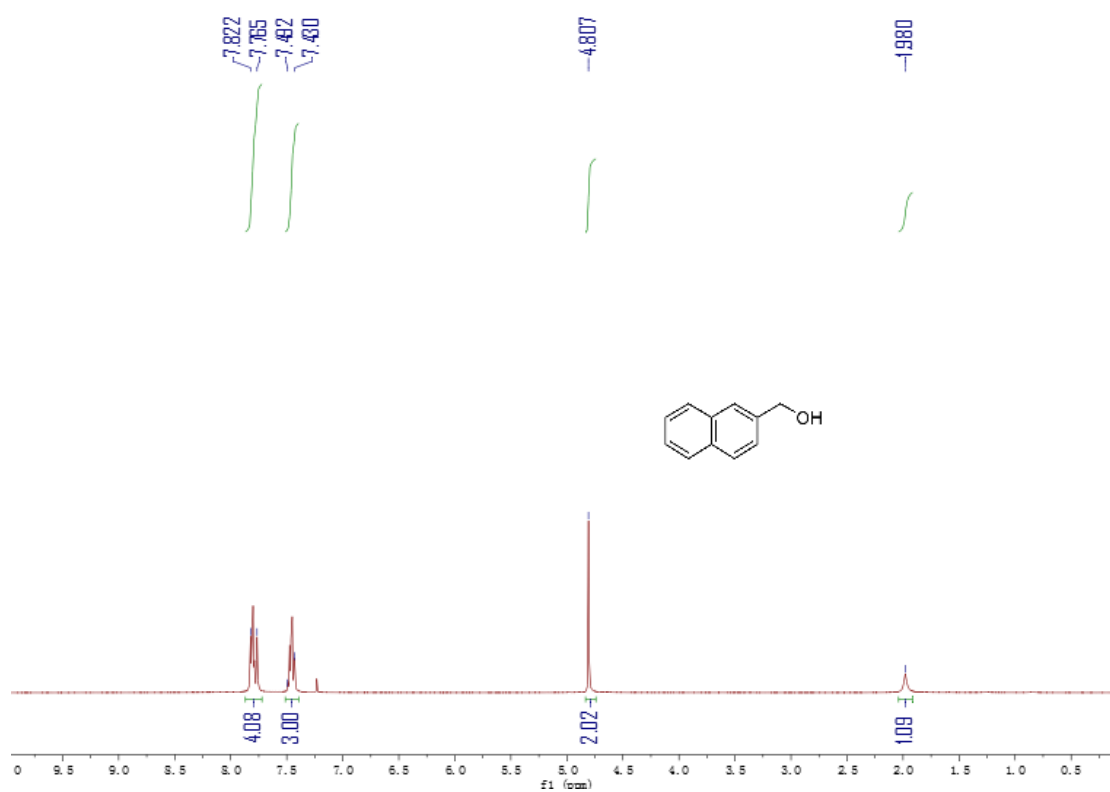

Figure S29.  $^1\text{H}$  NMR spectrum of naphthalen-2-ylmethanol in  $\text{CDCl}_3$ .

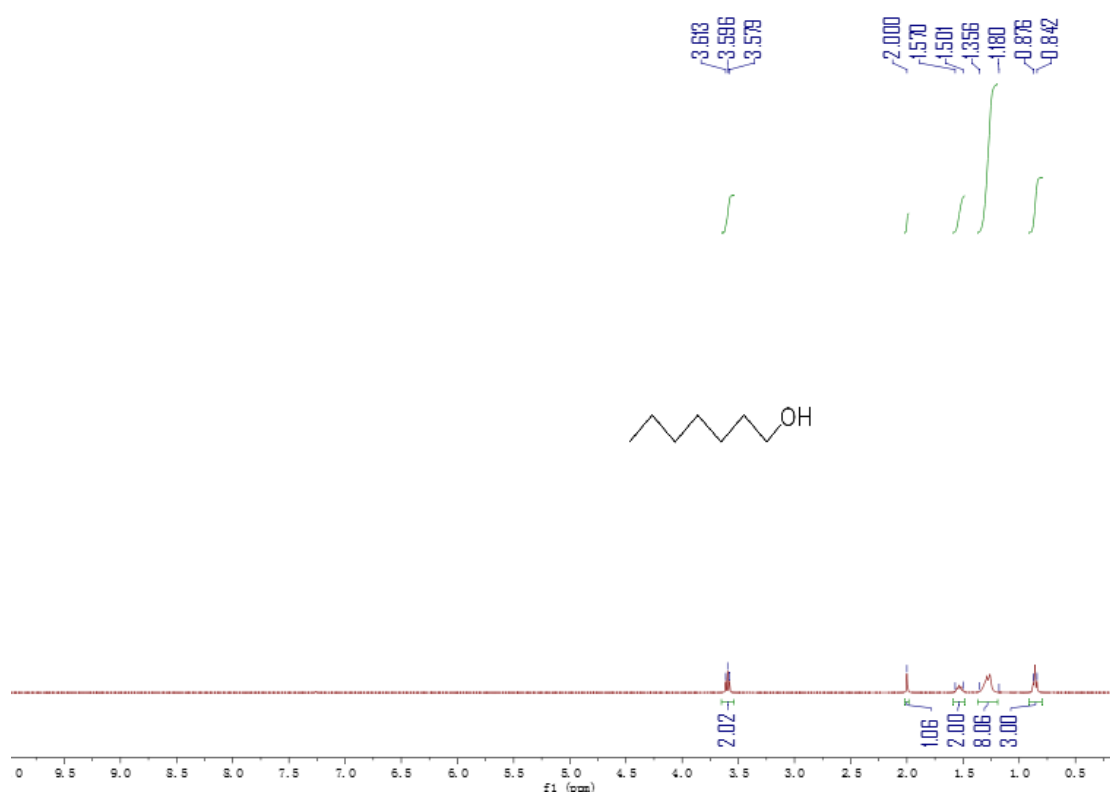

Figure S30. <sup>1</sup>H NMR spectrum of heptan-1-ol in CDCl<sub>3</sub>.



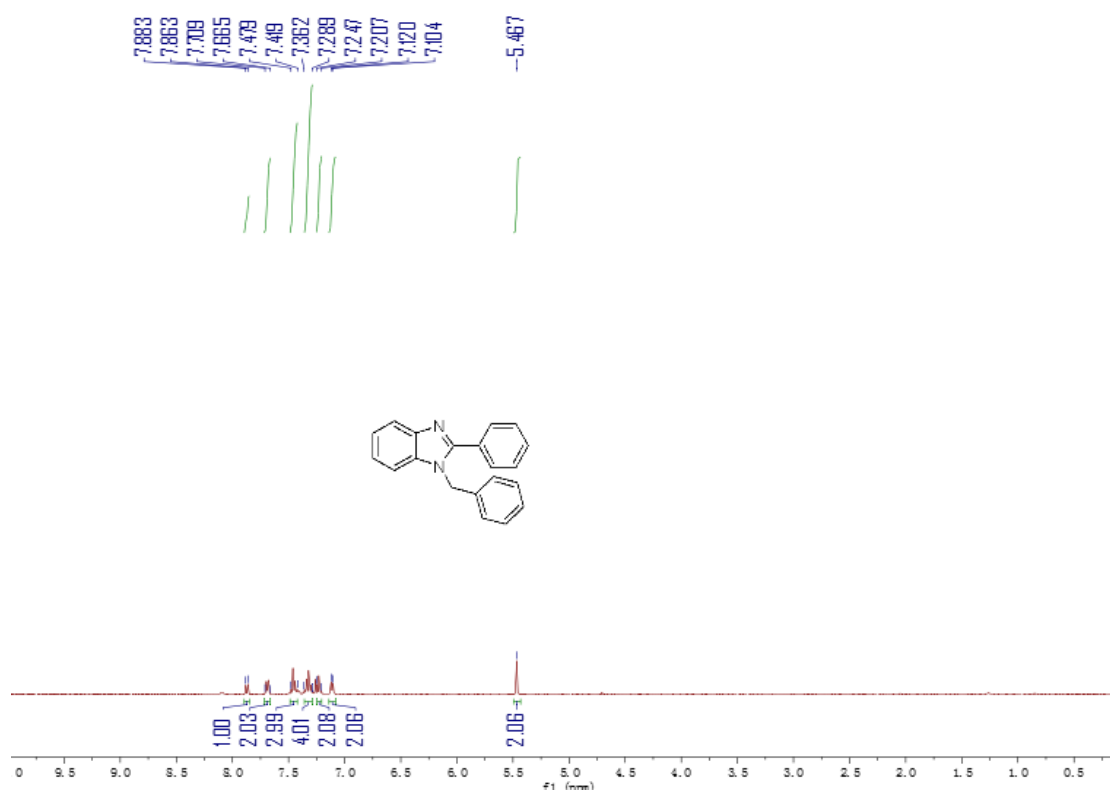

Figure S31. <sup>1</sup>H NMR spectrum of 1-benzyl-2-phenyl-1H-benzo[d]imidazole in CDCl<sub>3</sub>.

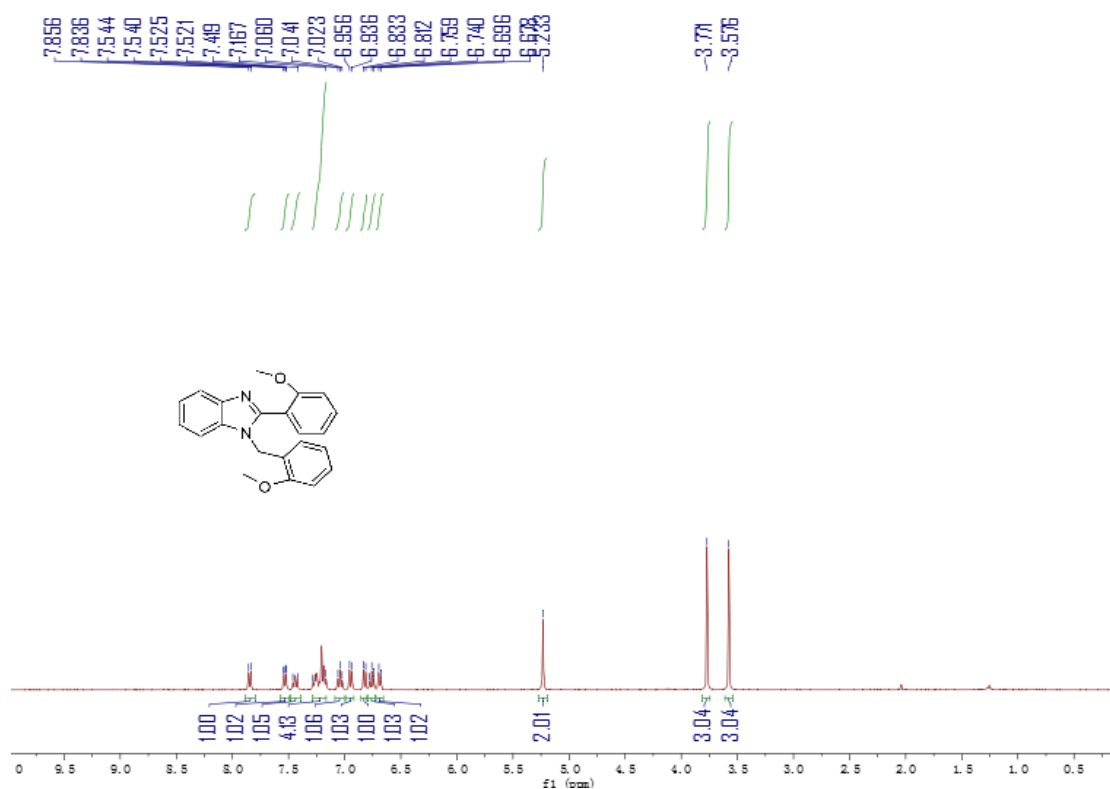

Figure S32. <sup>1</sup>H NMR spectrum of 1-(2-methoxybenzyl)-2-(2-methoxyphenyl)-1H-benzo[d]imidazole in CDCl<sub>3</sub>.

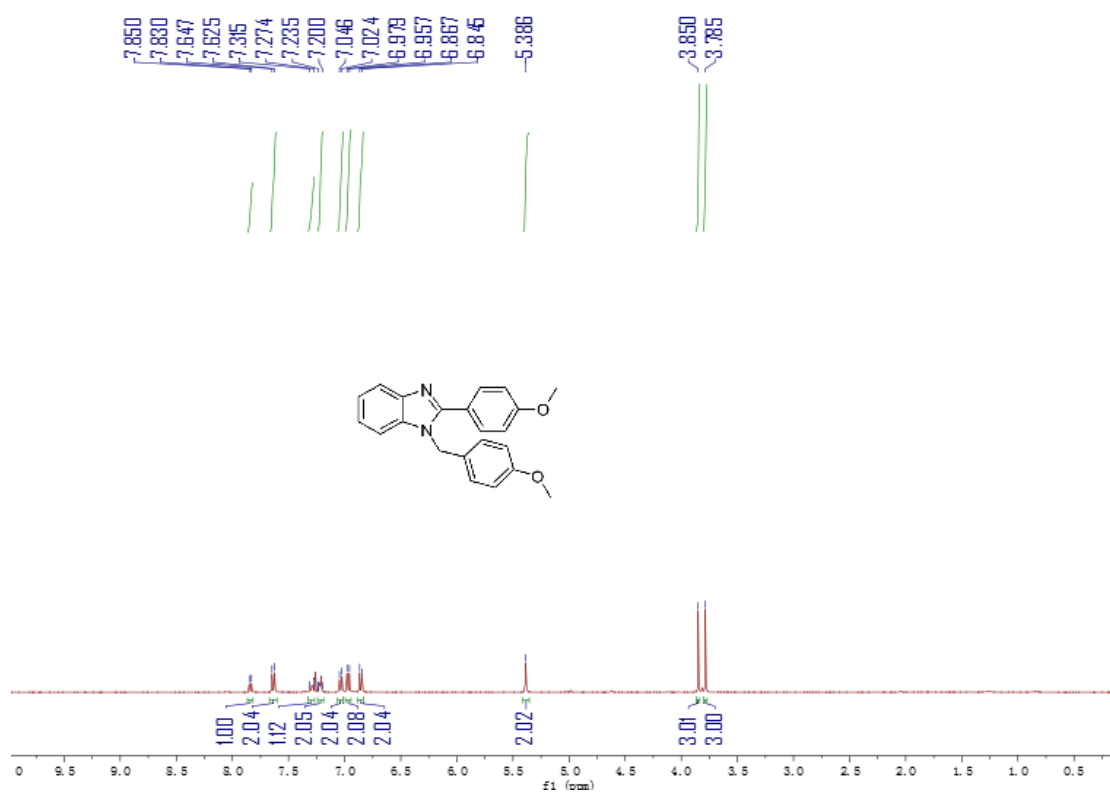

Figure S33. <sup>1</sup>H NMR spectrum of 1-(4-methoxybenzyl)-2-(4-methoxyphenyl)-1H-benzo[d]imidazole in CDCl<sub>3</sub>.

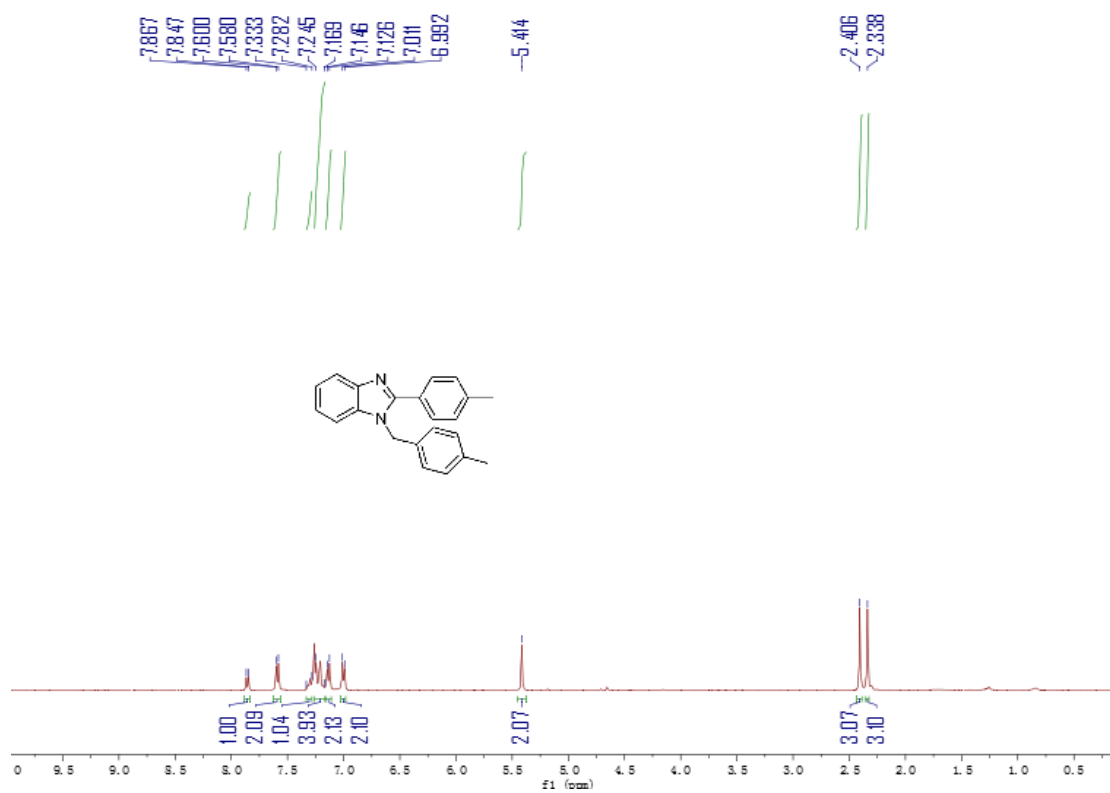

Figure S34. <sup>1</sup>H NMR spectrum of 1-(4-methylbenzyl)-2-(p-tolyl)-1H-benzo[d]imidazole in CDCl<sub>3</sub>.

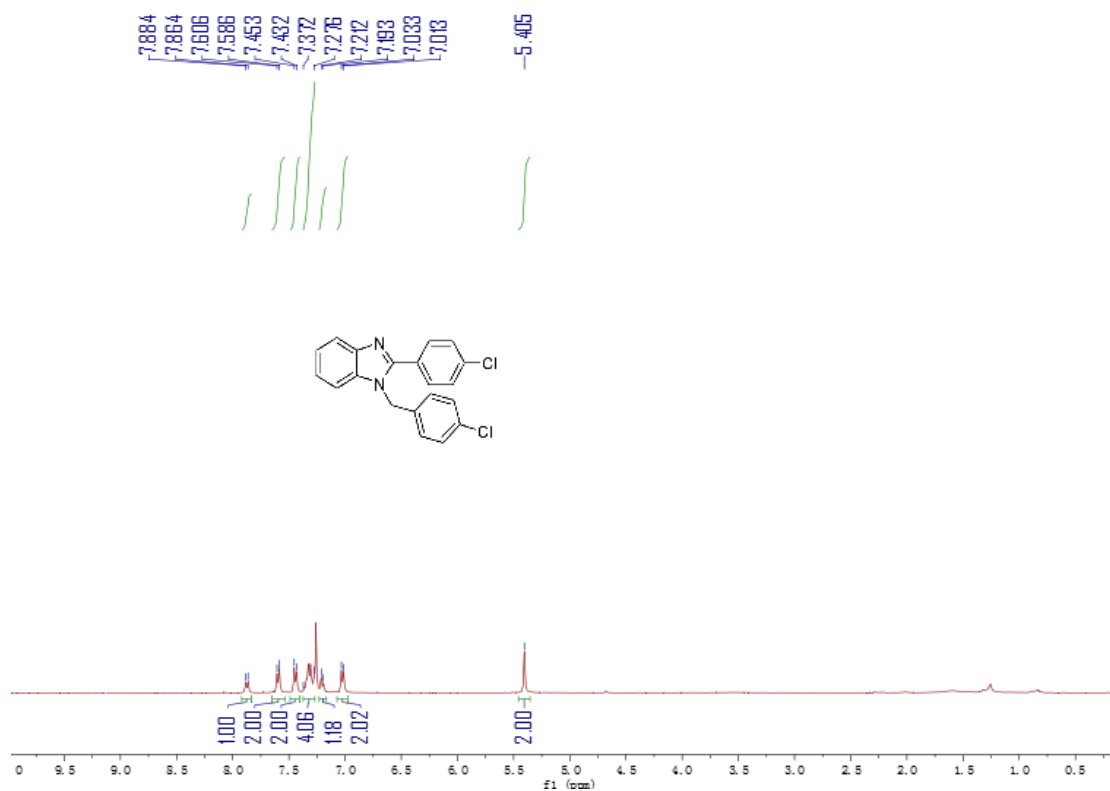

Figure S35. <sup>1</sup>H NMR spectrum of 1-(4-chlorobenzyl)-2-(4-chlorophenyl)-1H-benzo[d]imidazole in CDCl<sub>3</sub>.

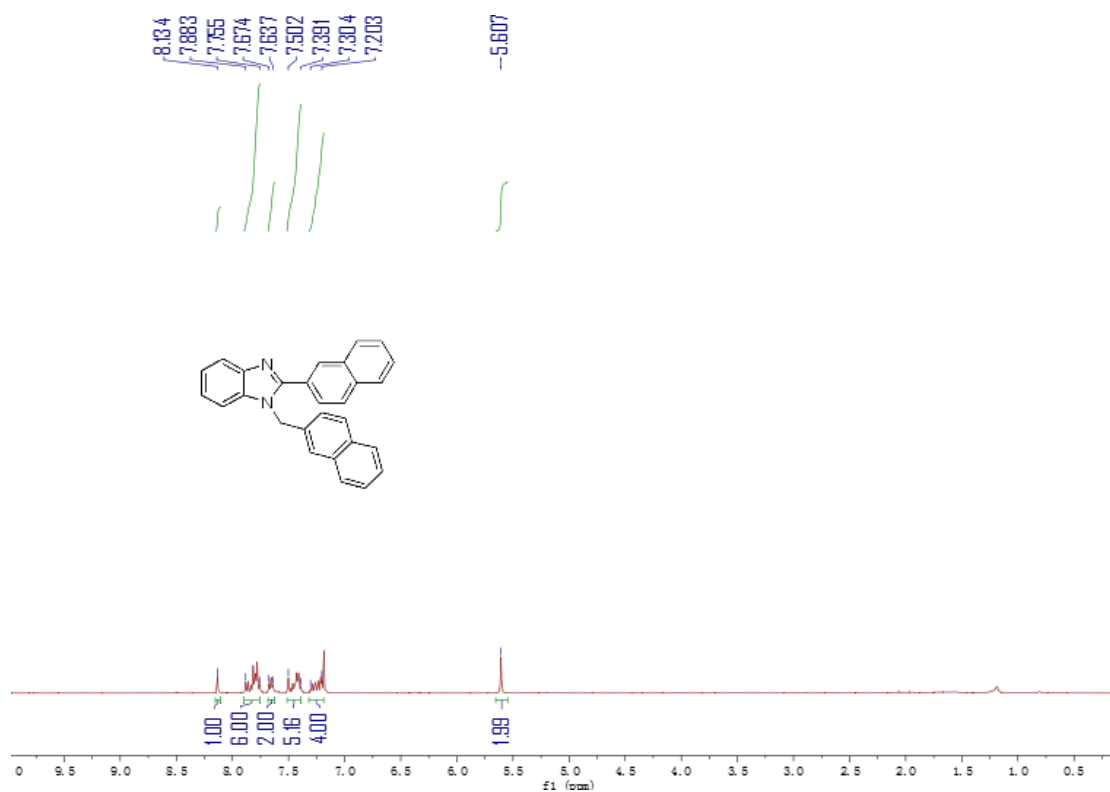

Figure S36. <sup>1</sup>H NMR spectrum of 2-(naphthalen-2-yl)-1-(naphthalen-2-ylmethyl)-1H-benzo[d]imidazole in CDCl<sub>3</sub>.

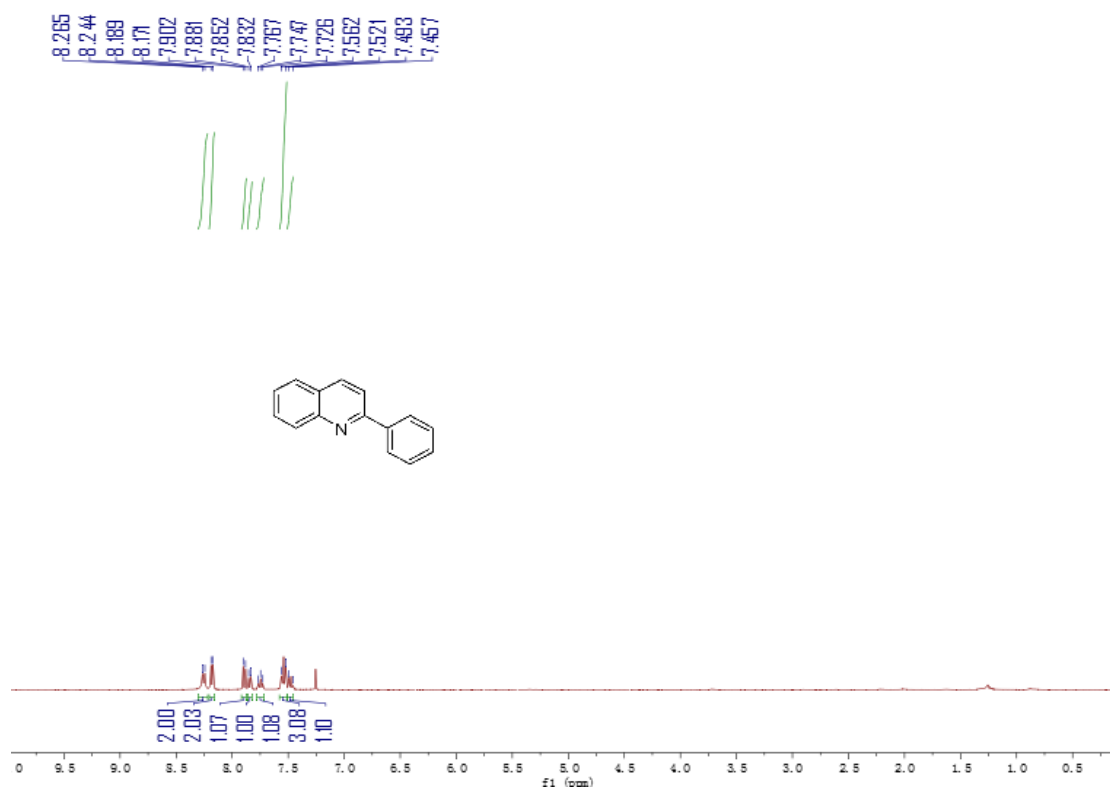

Figure S37. <sup>1</sup>H NMR spectrum of 2-phenylquinoline in CDCl<sub>3</sub>.

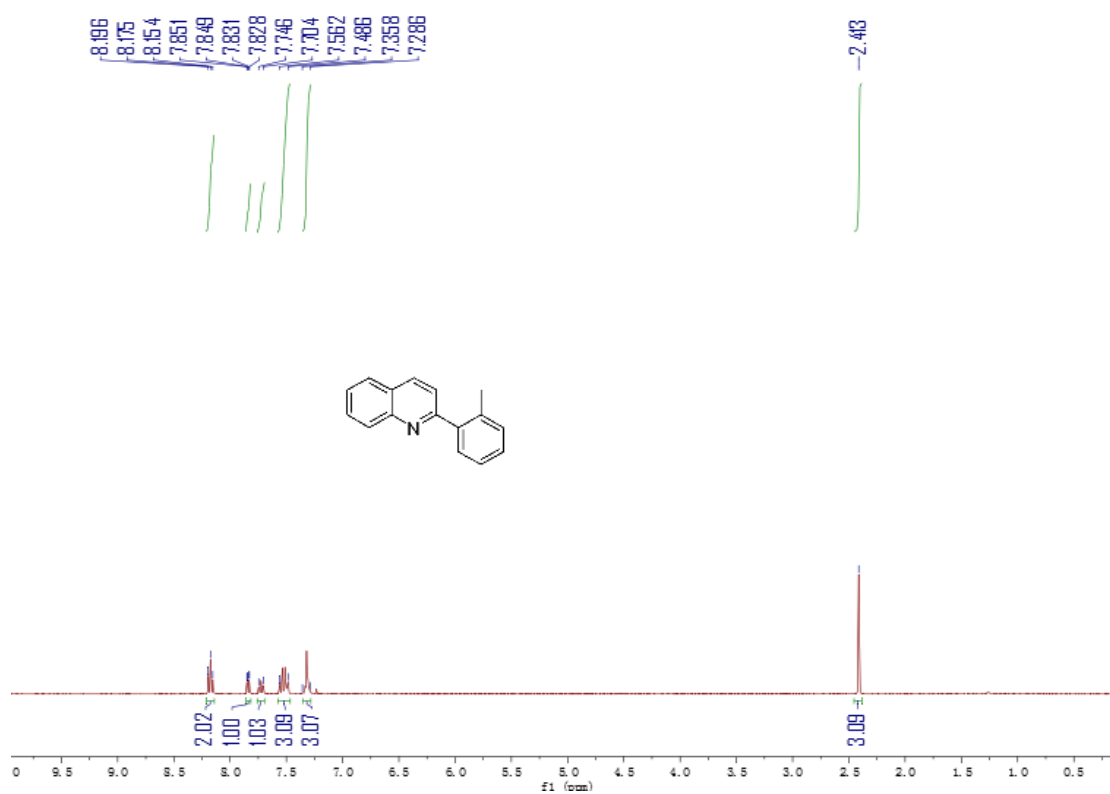

Figure S38. <sup>1</sup>H NMR spectrum of 2-(o-tolyl)quinoline in CDCl<sub>3</sub>.



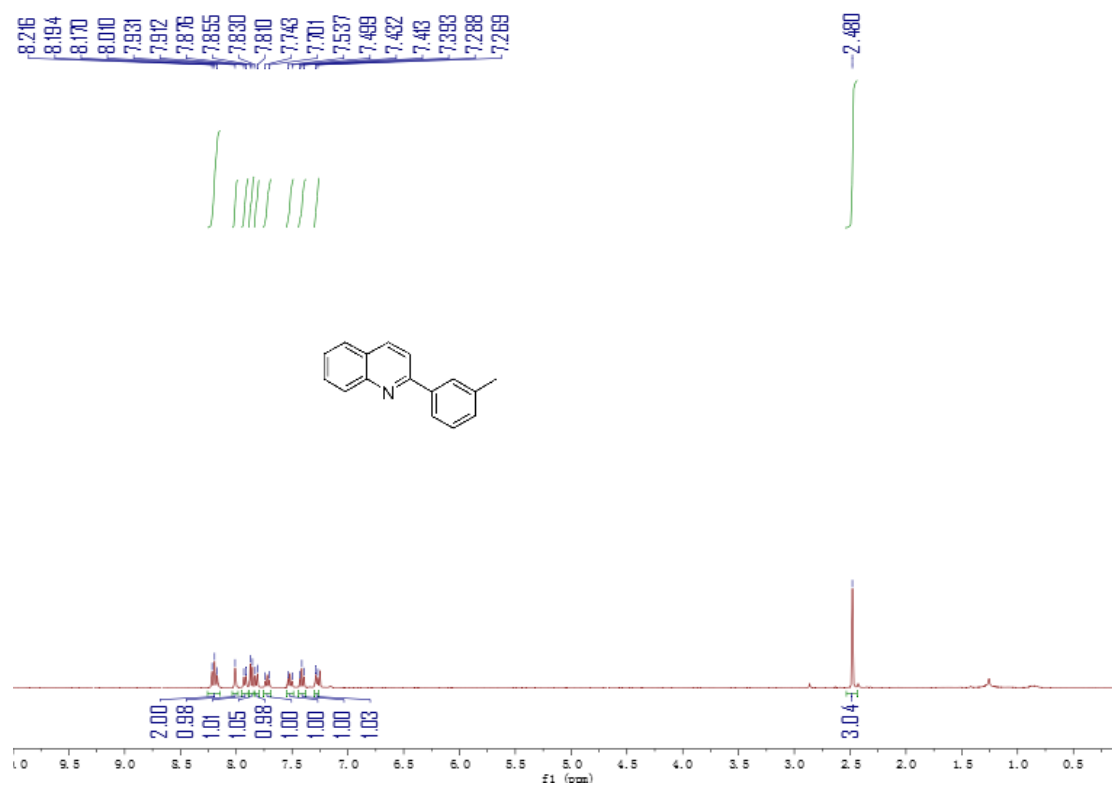

Figure S39. <sup>1</sup>H NMR spectrum of 2-(m-tolyl)quinoline in CDCl<sub>3</sub>.

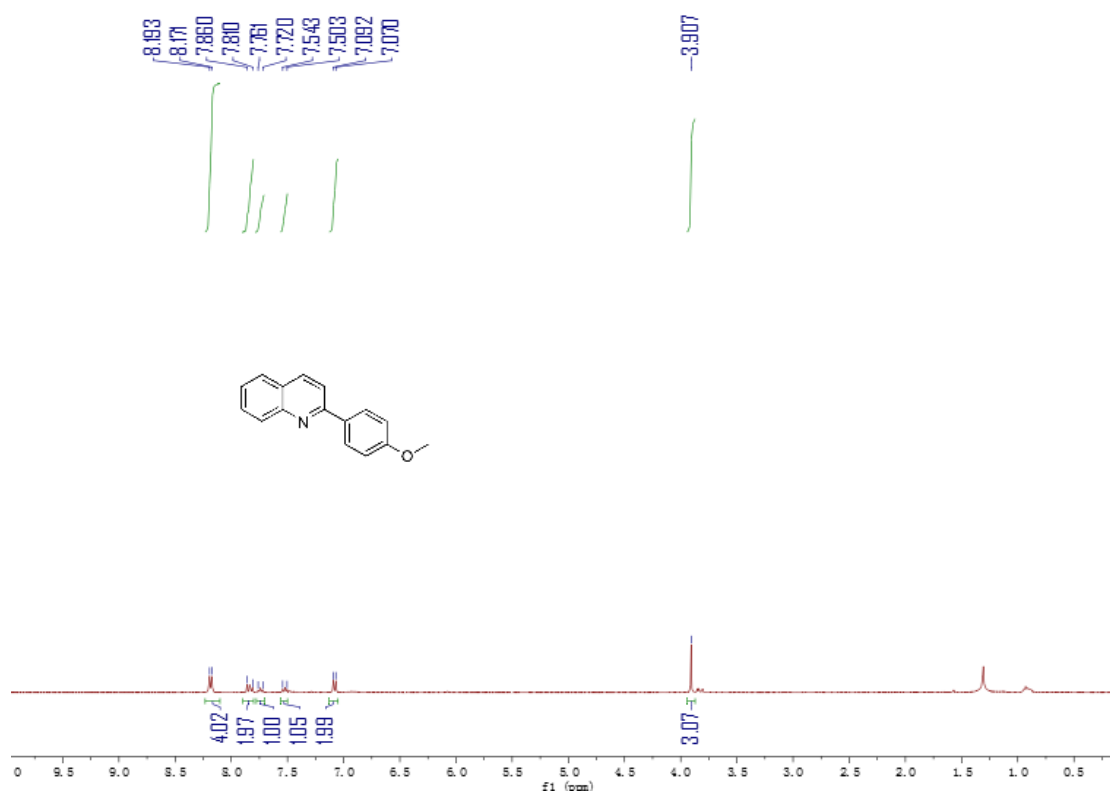

Figure S40. <sup>1</sup>H NMR spectrum of 2-(4-methoxyphenyl)quinoline in CDCl<sub>3</sub>.

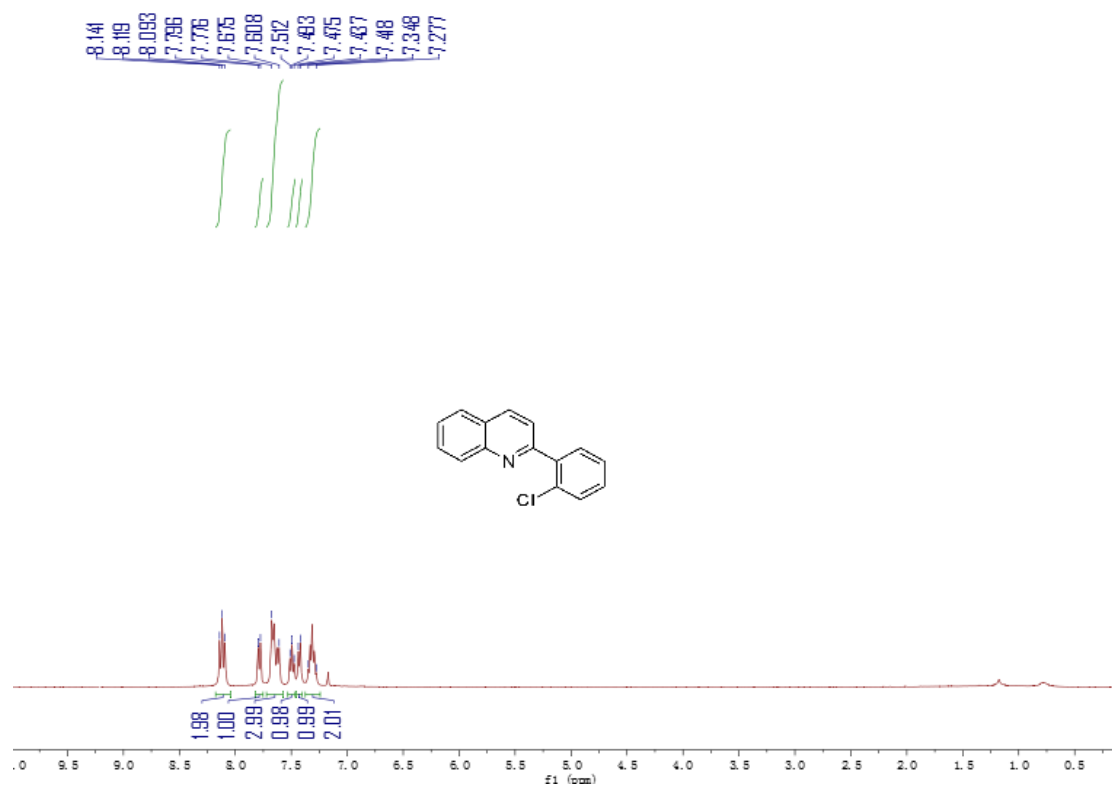

Figure S41. <sup>1</sup>H NMR spectrum of 2-(2-chlorophenyl)quinoline in CDCl<sub>3</sub>.

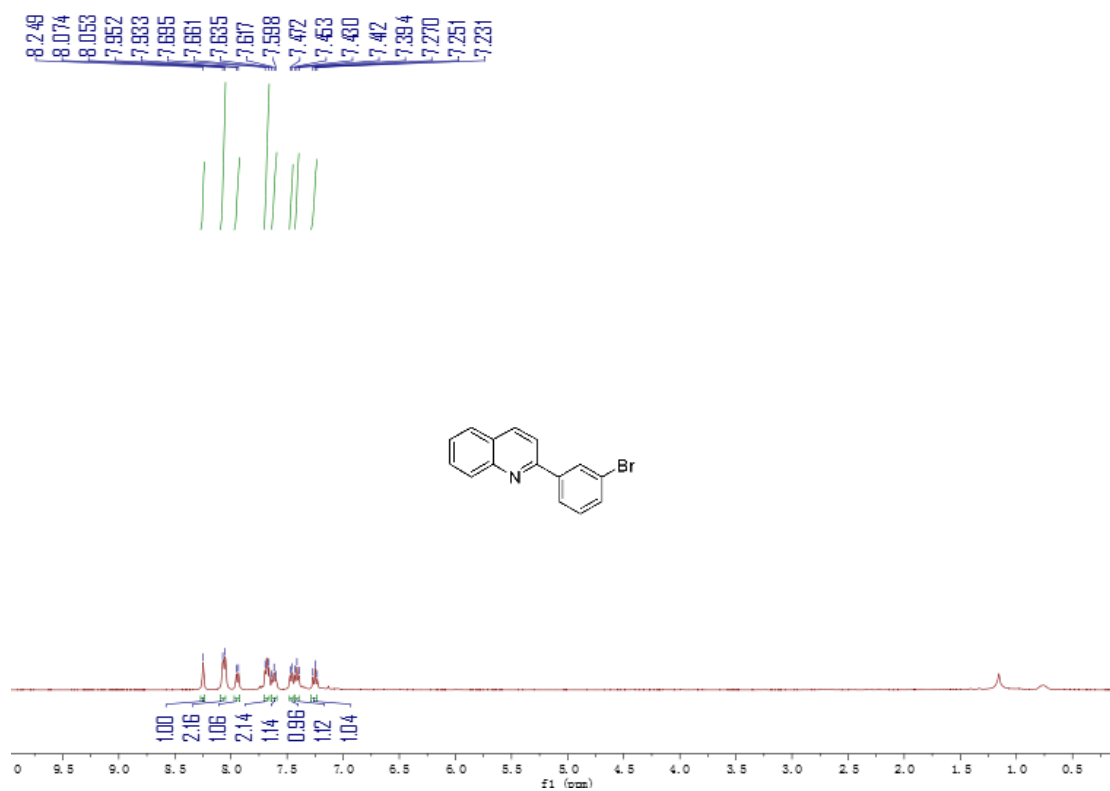

Figure S42. <sup>1</sup>H NMR spectrum of 2-(3-bromophenyl)quinoline in CDCl<sub>3</sub>.

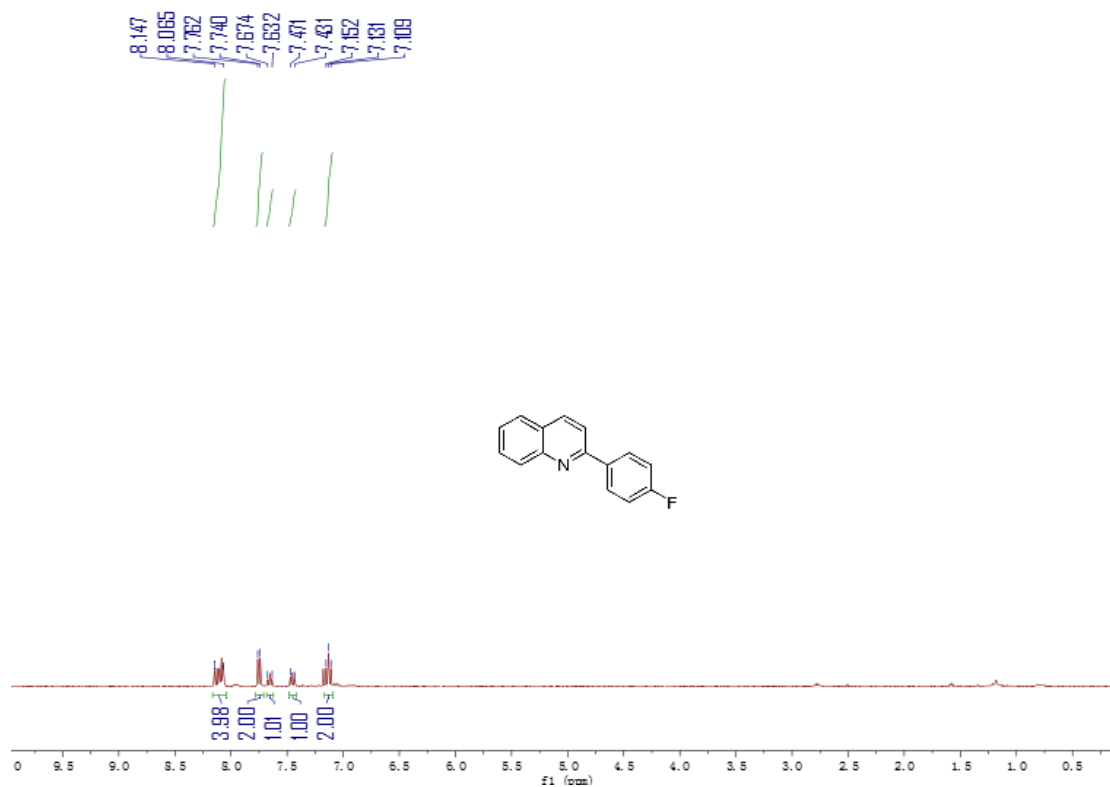

Figure S43. <sup>1</sup>H NMR spectrum of 2-(4-fluorophenyl)quinoline in CDCl<sub>3</sub>.

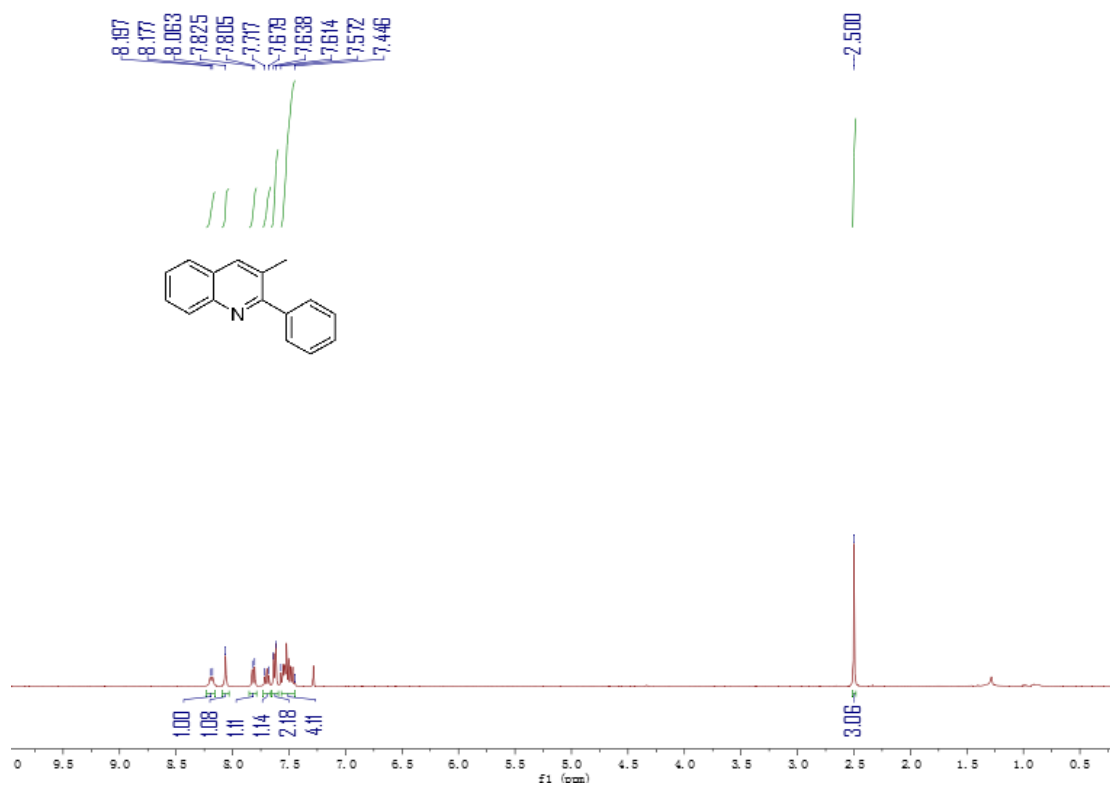

Figure S44. <sup>1</sup>H NMR spectrum of 3-methyl-2-phenylquinoline in CDCl<sub>3</sub>.

## <sup>13</sup>C NMR Spectra

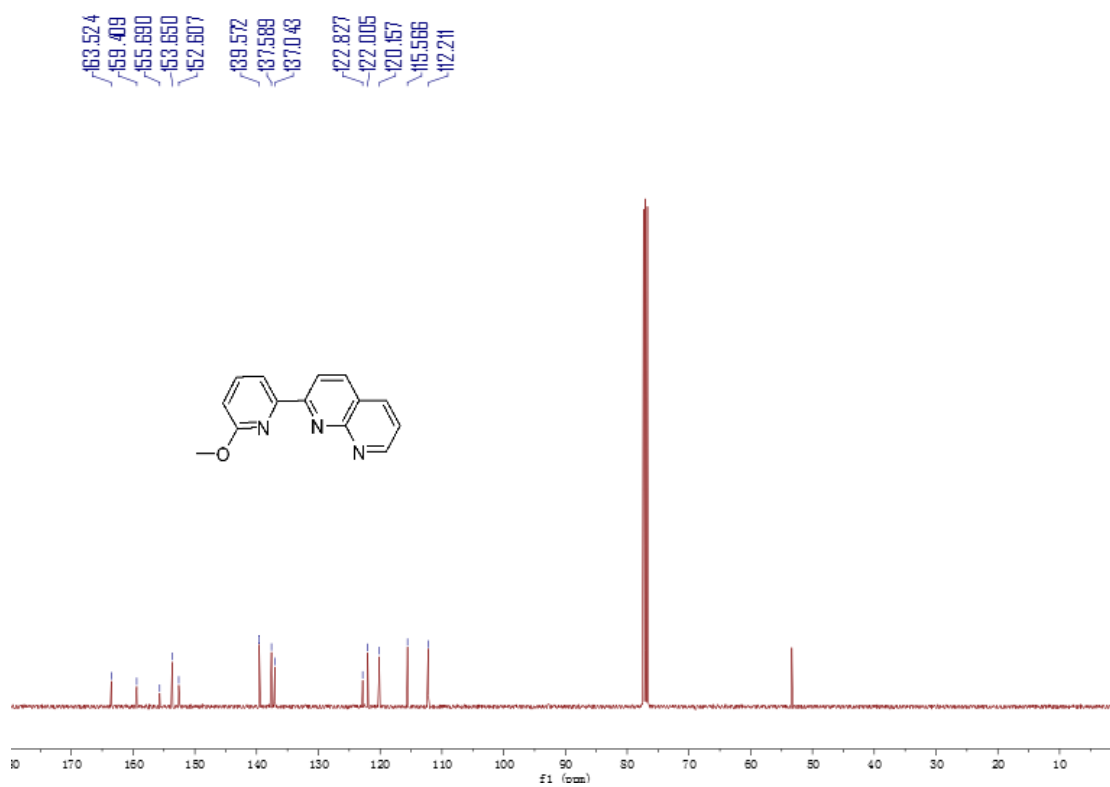

Figure S45. <sup>13</sup>C NMR spectrum of 2-(6-methoxypyridin-2-yl)-1,8-naphthyridine in CDCl<sub>3</sub>.

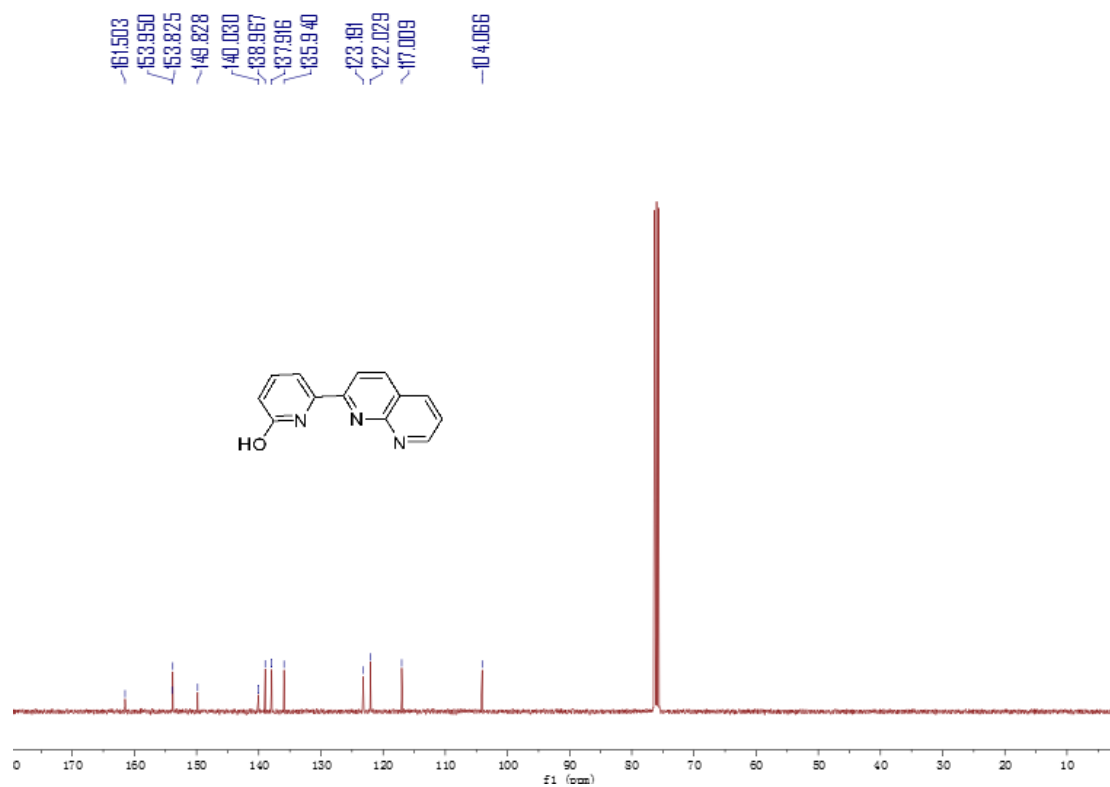

Figure S46. <sup>13</sup>C NMR spectrum of 6-(1,8-naphthyridin-2-yl)pyridin-2-ol in CDCl<sub>3</sub>.



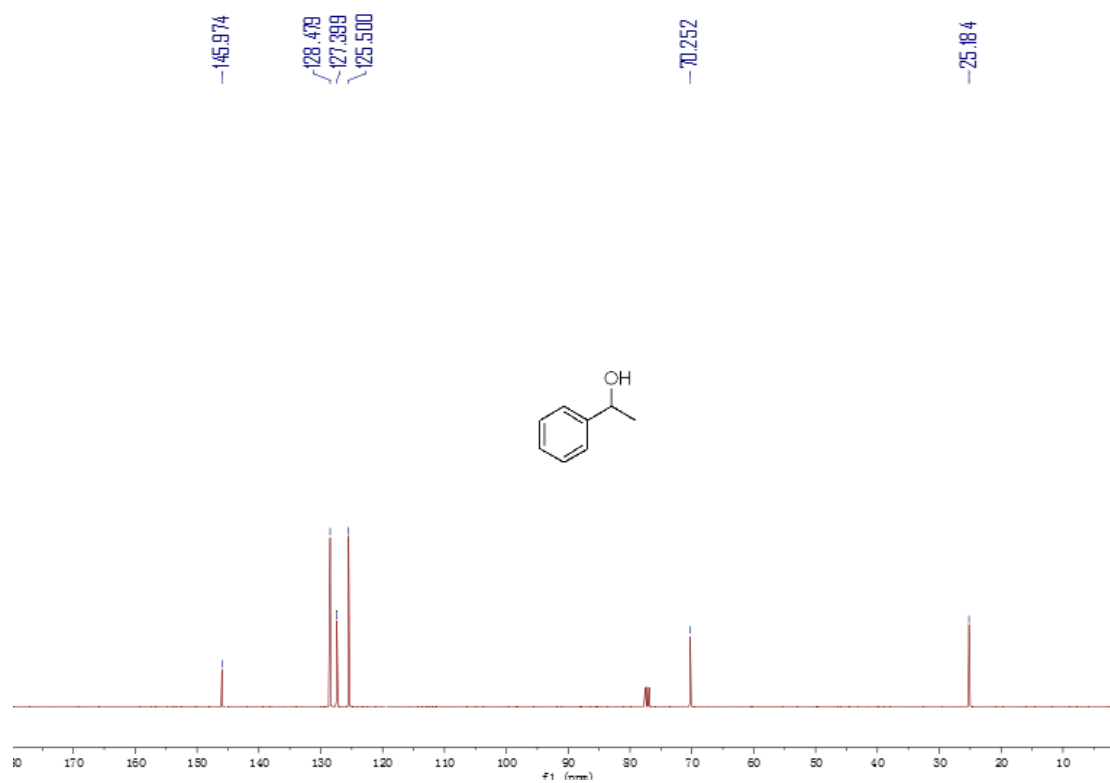

Figure S47.  $^{13}\text{C}$  NMR spectrum of 1-phenylethan-1-ol in  $\text{CDCl}_3$ .

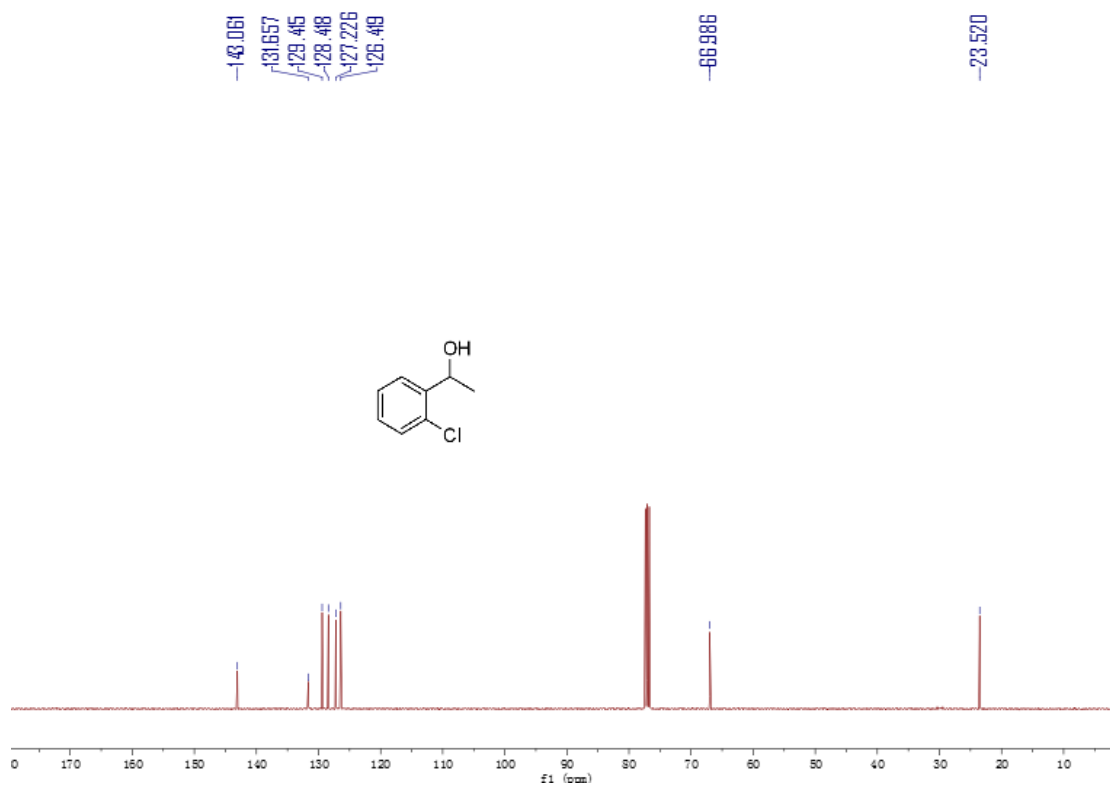

Figure S48. <sup>13</sup>C NMR spectrum of 1-(2-chlorophenyl)ethan-1-ol in CDCl<sub>3</sub>.

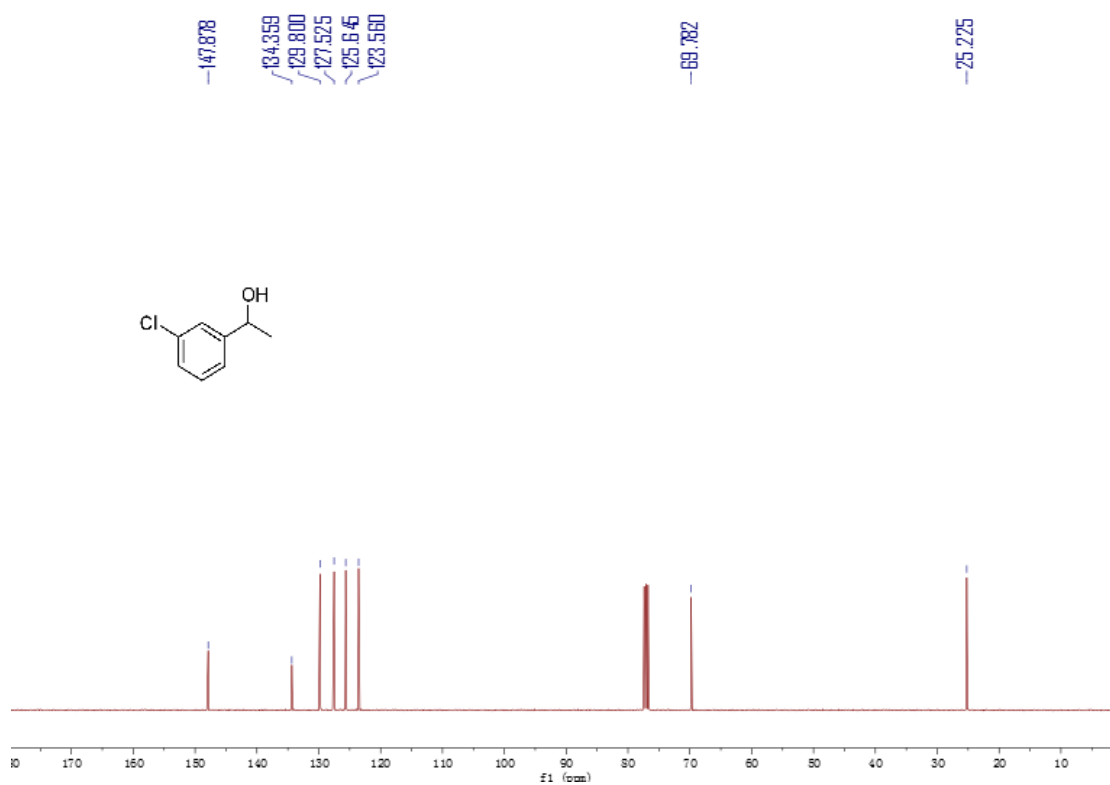

Figure S49. <sup>13</sup>C NMR spectrum of 1-(3-chlorophenyl)ethan-1-ol in CDCl<sub>3</sub>.

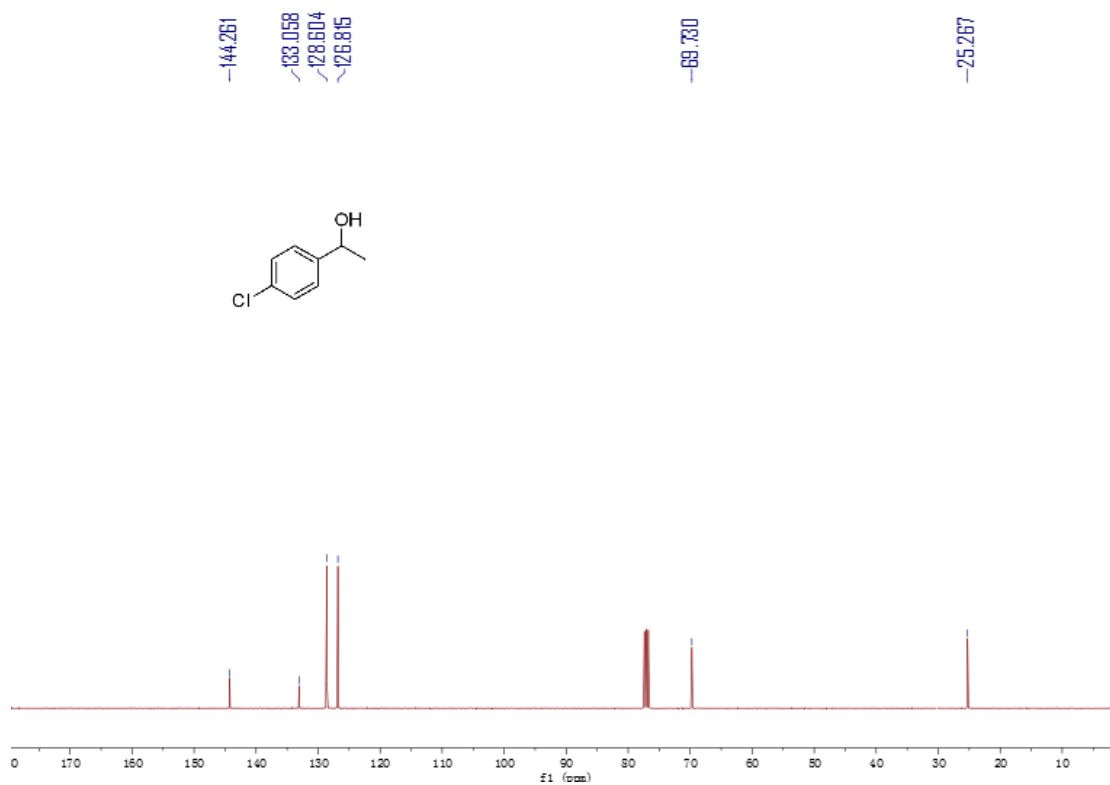

Figure S50. <sup>13</sup>C NMR spectrum of 1-(4-chlorophenyl)ethan-1-ol in CDCl<sub>3</sub>.

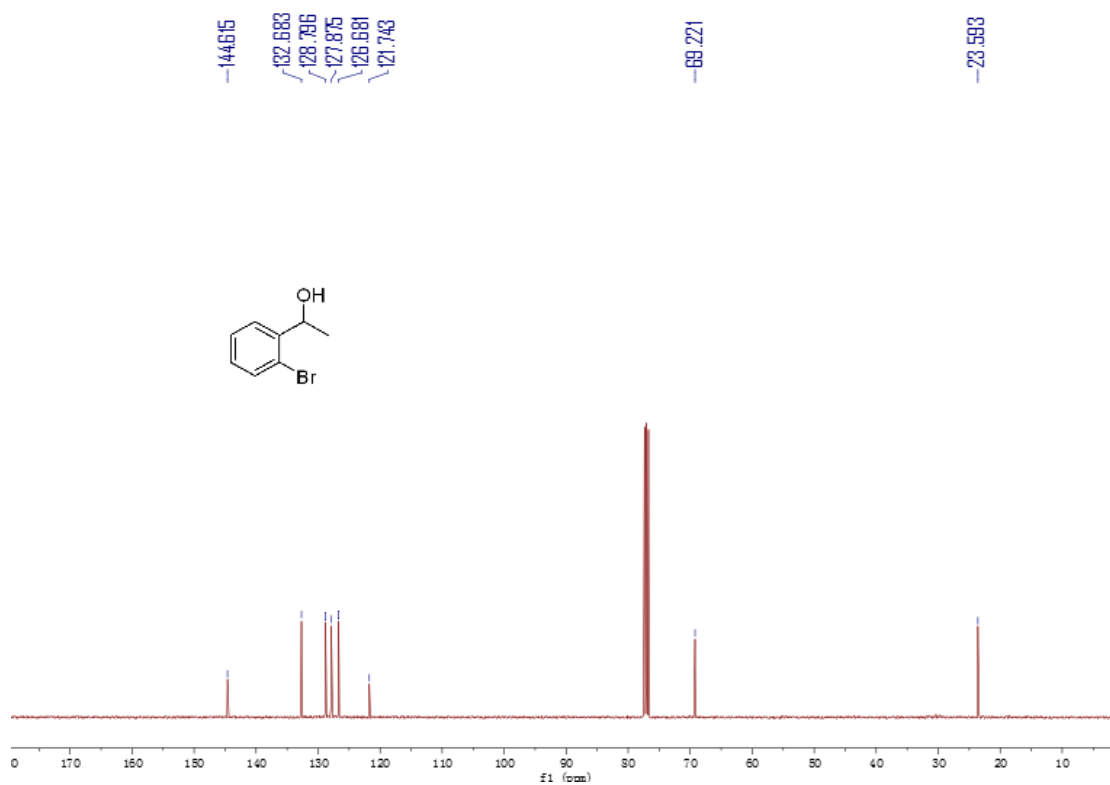

Figure S51. <sup>13</sup>C NMR spectrum of 1-(2-bromophenyl)ethan-1-ol in CDCl<sub>3</sub>.

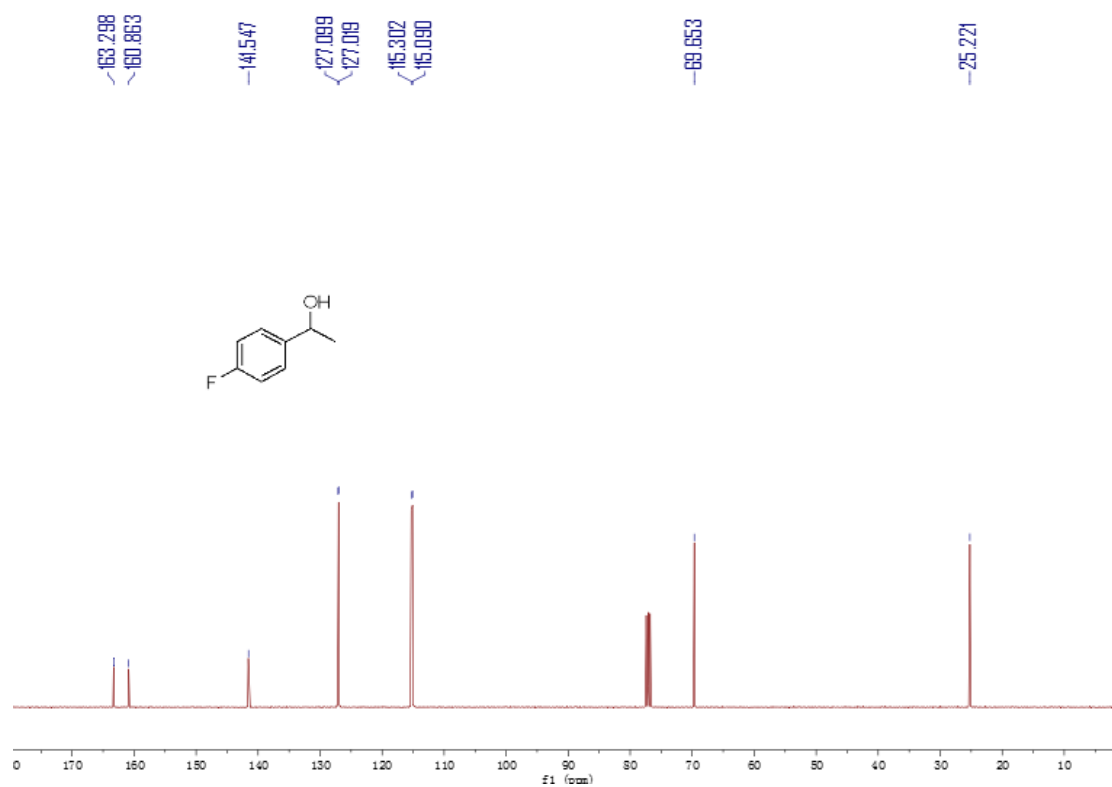

Figure S52. <sup>13</sup>C NMR spectrum of 1-(4-fluorophenyl)ethan-1-ol in CDCl<sub>3</sub>.

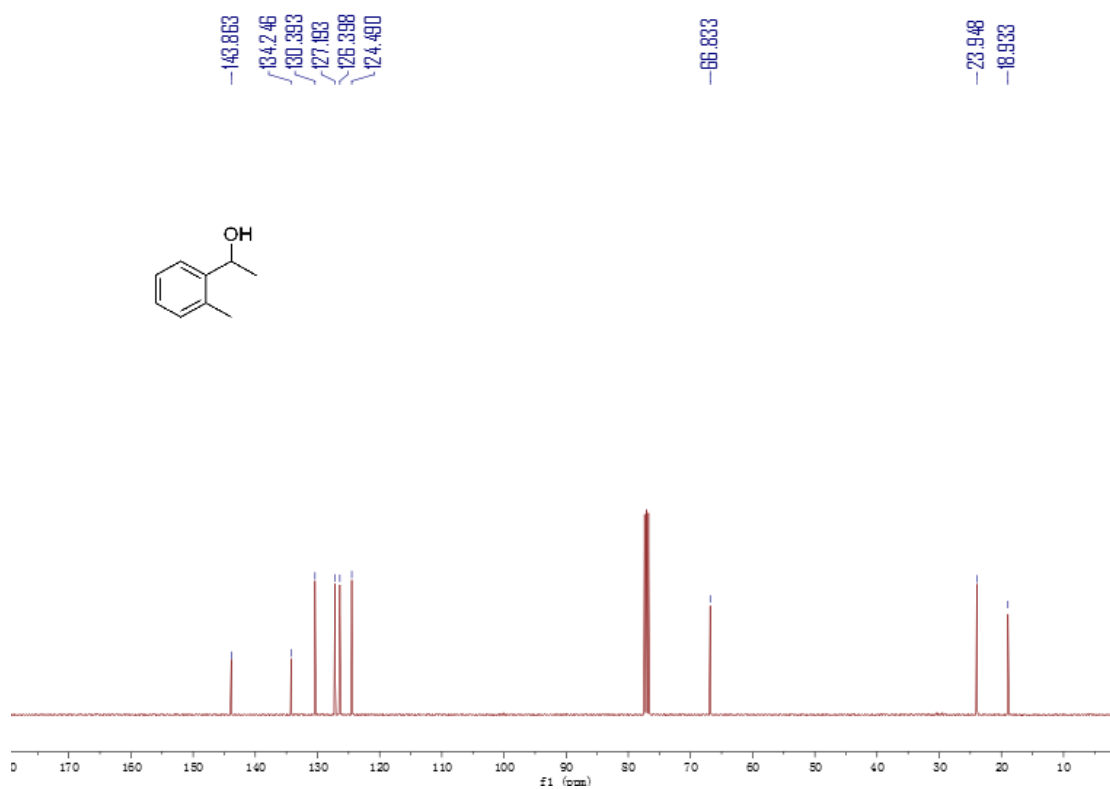

Figure S53. <sup>13</sup>C NMR spectrum of 1-(o-tolyl)ethan-1-ol in CDCl<sub>3</sub>.

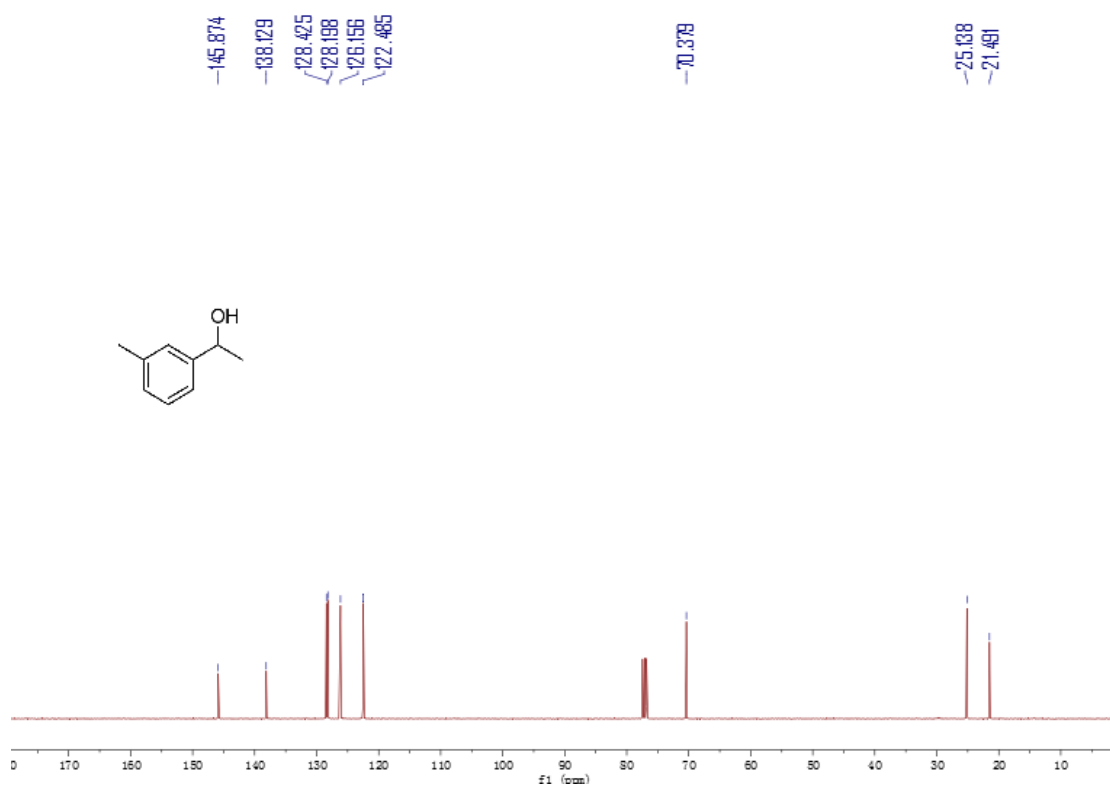

Figure S54.  $^{13}\text{C}$  NMR spectrum of 1-(m-tolyl)ethan-1-ol in CDCl<sub>3</sub>.



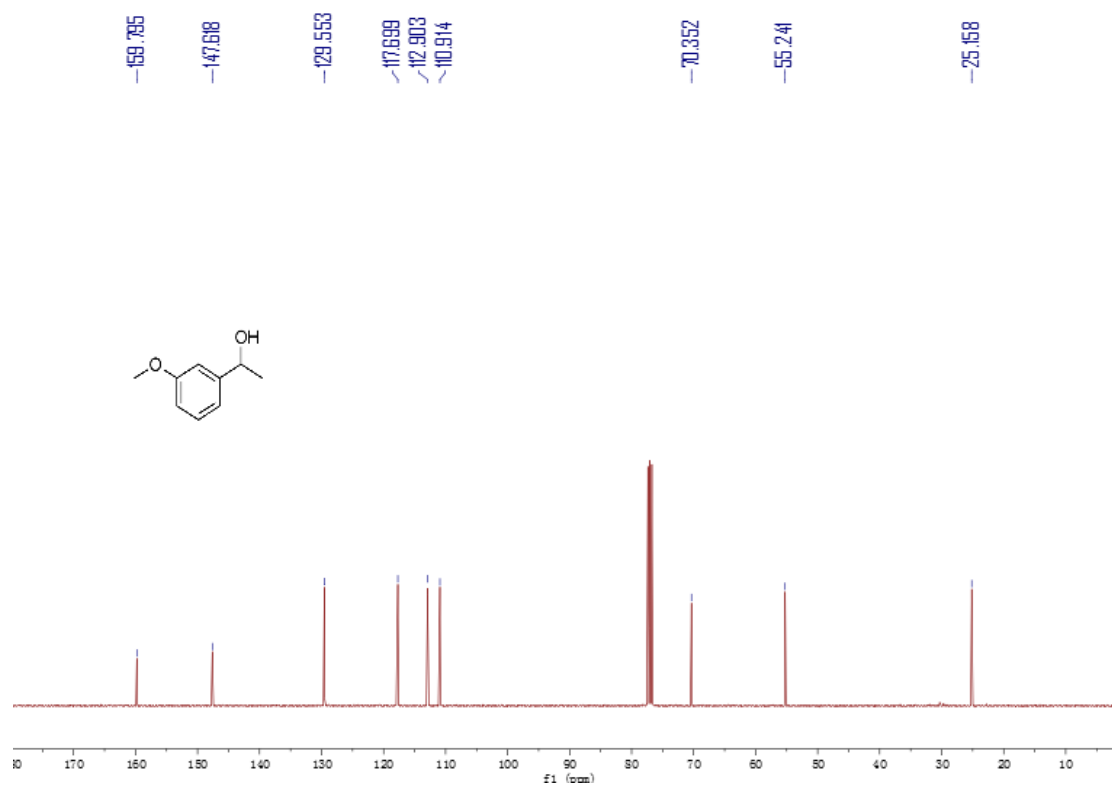

Figure S55. <sup>13</sup>C NMR spectrum of 1-(3-methoxyphenyl)ethan-1-ol in CDCl<sub>3</sub>.

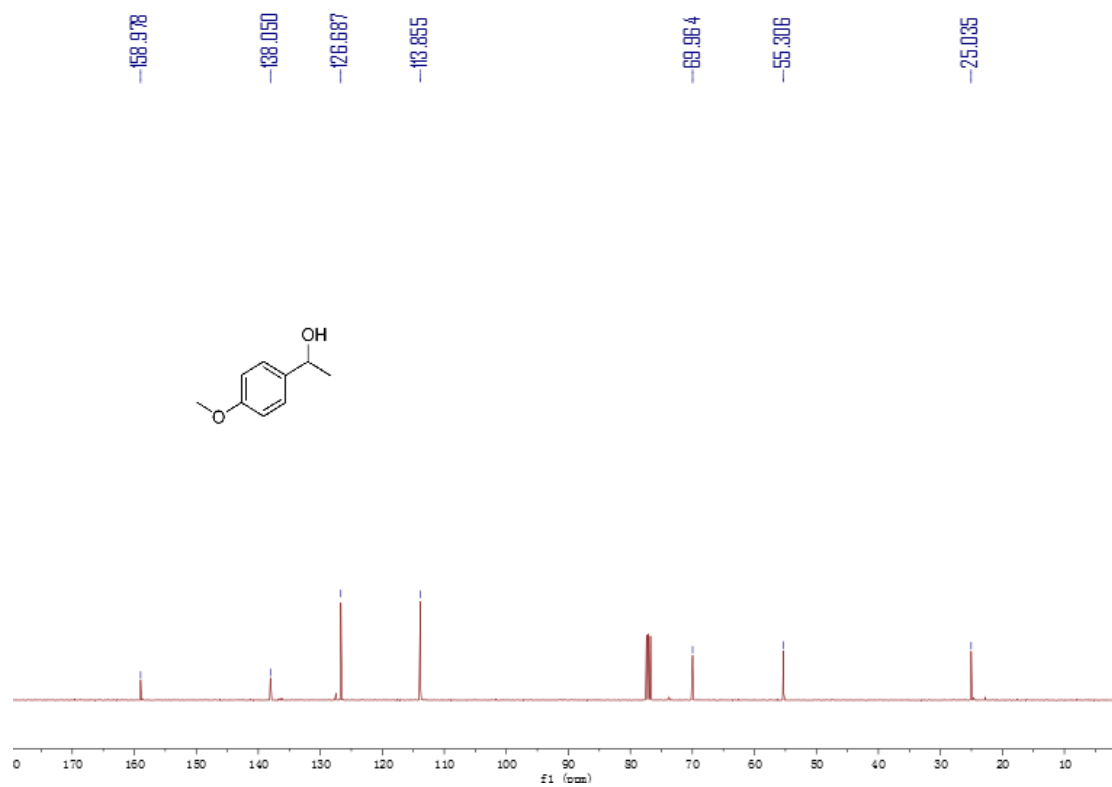

Figure S56. <sup>13</sup>C NMR spectrum of 1-(4-methoxyphenyl)ethan-1-ol in CDCl<sub>3</sub>.

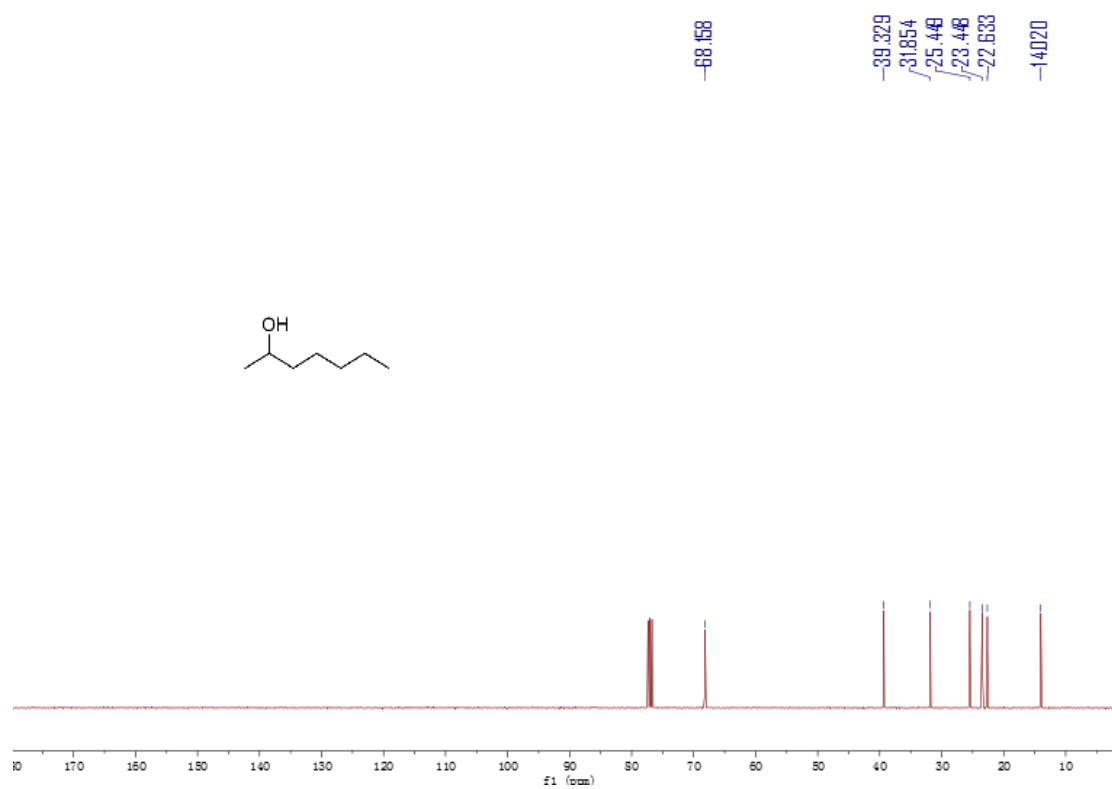

Figure S57.  $^{13}\text{C}$  NMR spectrum of heptan-2-ol in  $\text{CDCl}_3$ .

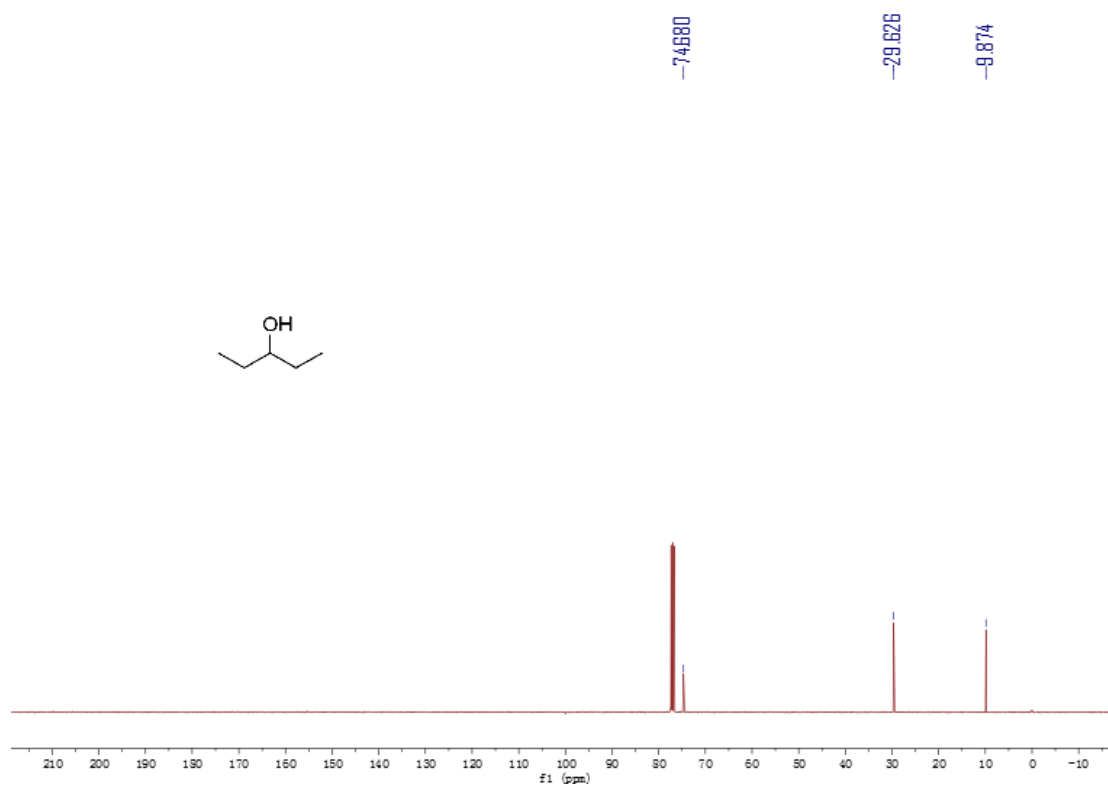

Figure S58.  $^{13}\text{C}$  NMR spectrum of pentan-3-ol in  $\text{CDCl}_3$ .

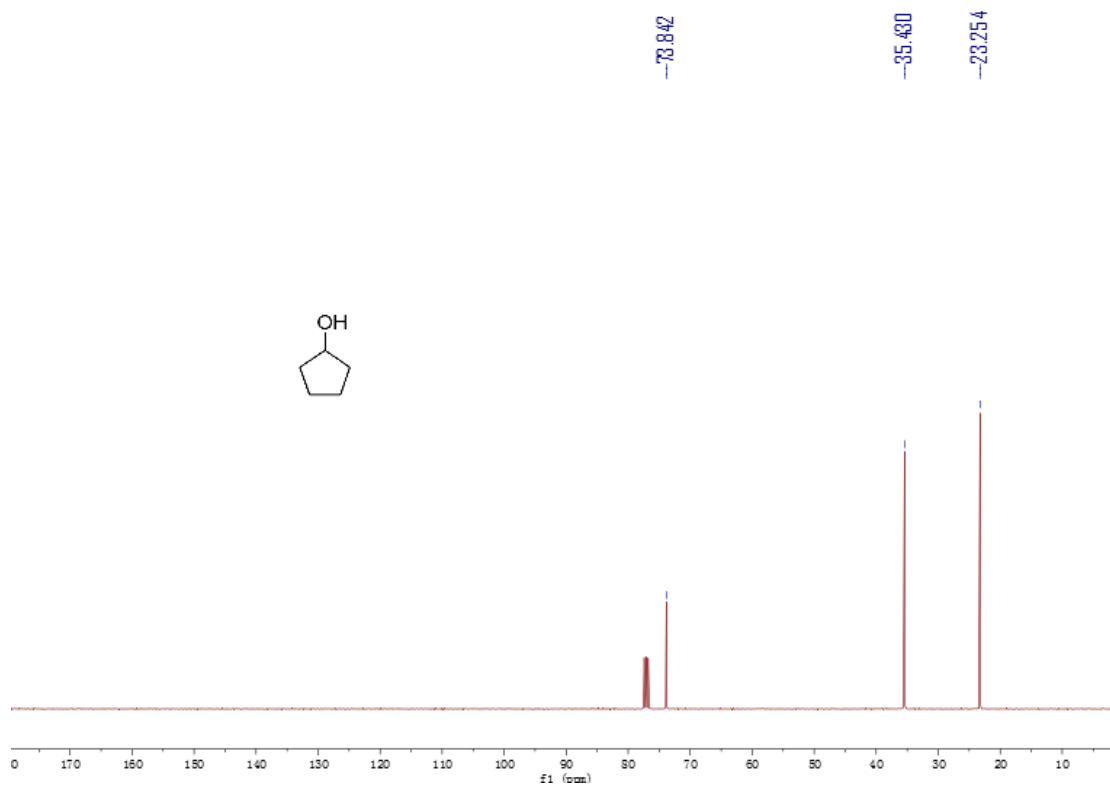

Figure S59.  $^{13}\text{C}$  NMR spectrum of cyclopentanol in  $\text{CDCl}_3$ .

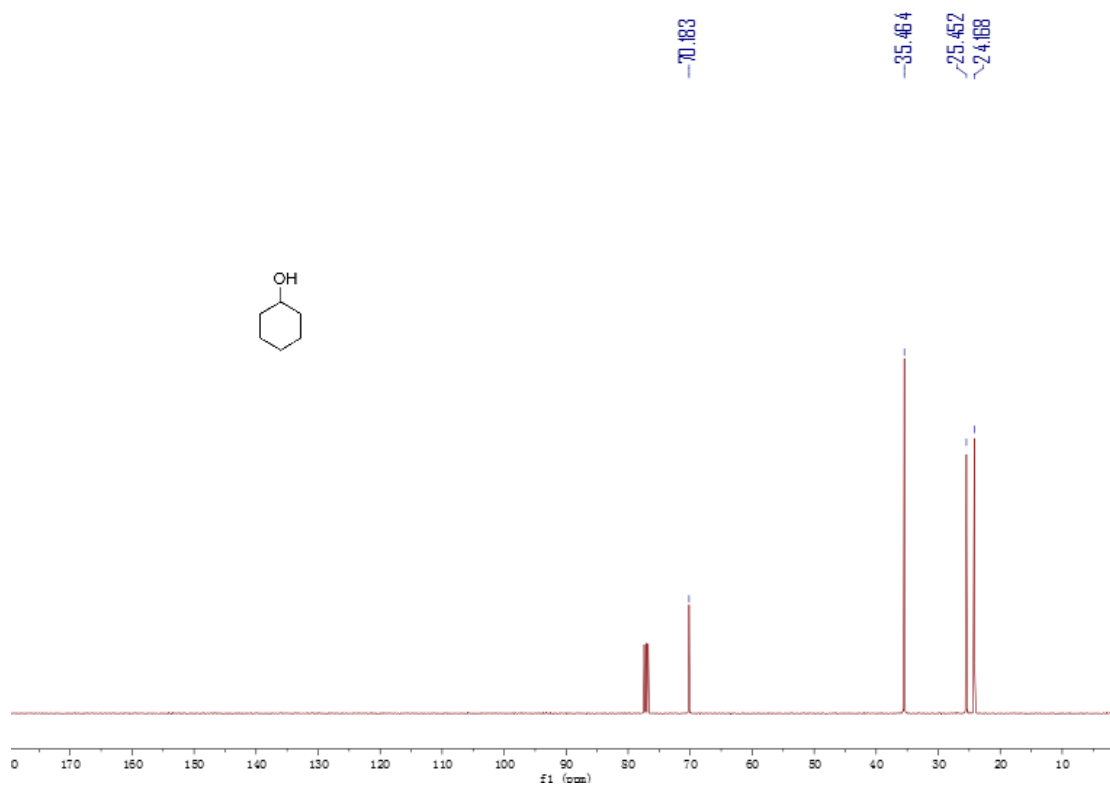

Figure S60.  $^{13}\text{C}$  NMR spectrum of cyclohexanol in CDCl<sub>3</sub>.

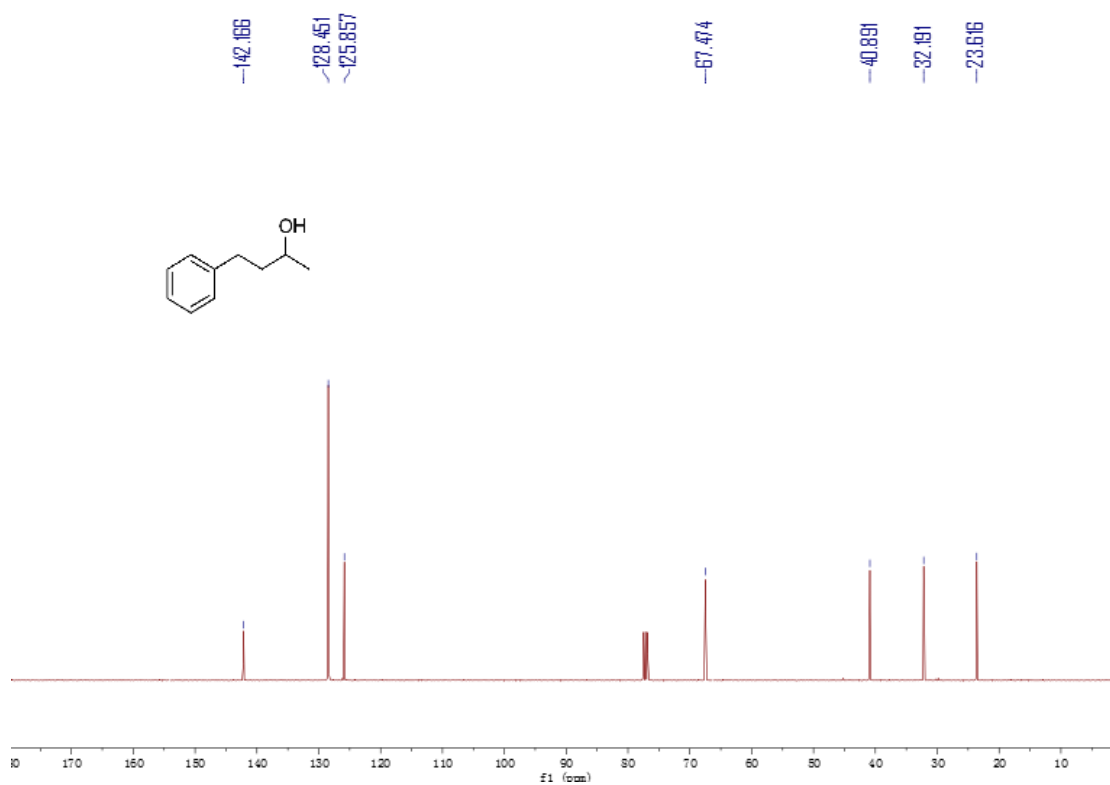

Figure S61.  $^{13}\text{C}$  NMR spectrum of 4-phenylbutan-2-ol in CDCl<sub>3</sub>.

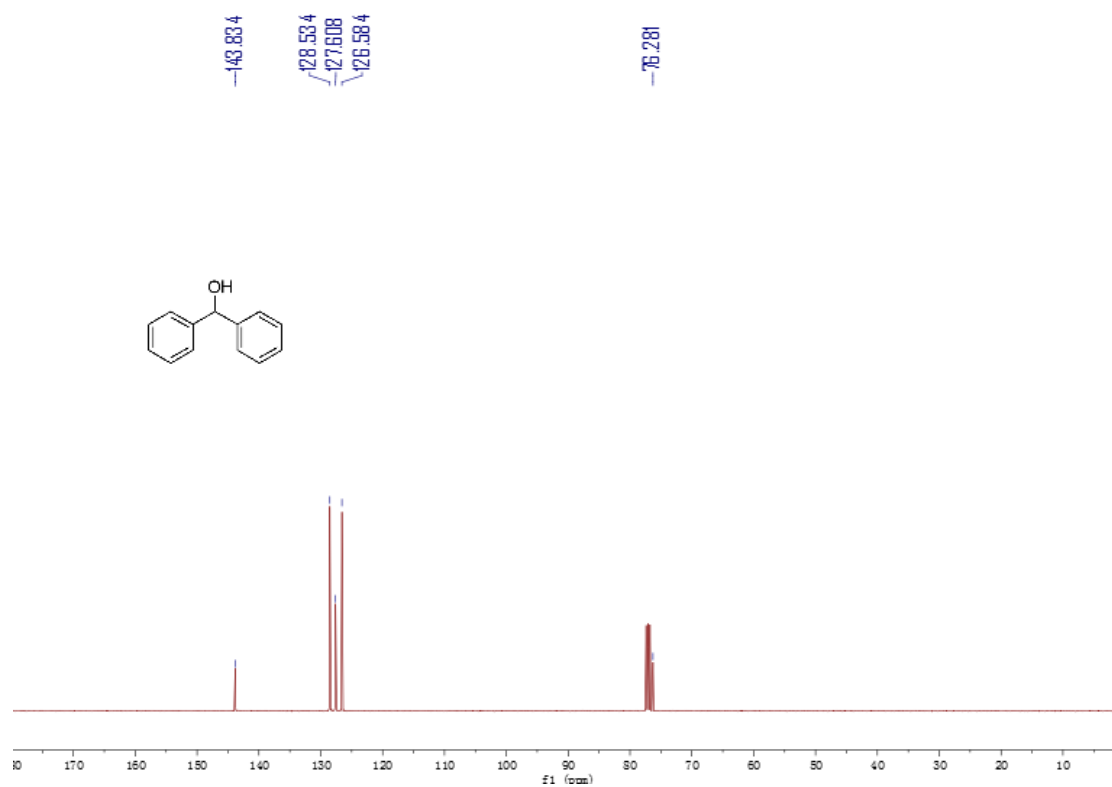

Figure S62.  $^{13}\text{C}$  NMR spectrum of diphenylmethanol in  $\text{CDCl}_3$ .



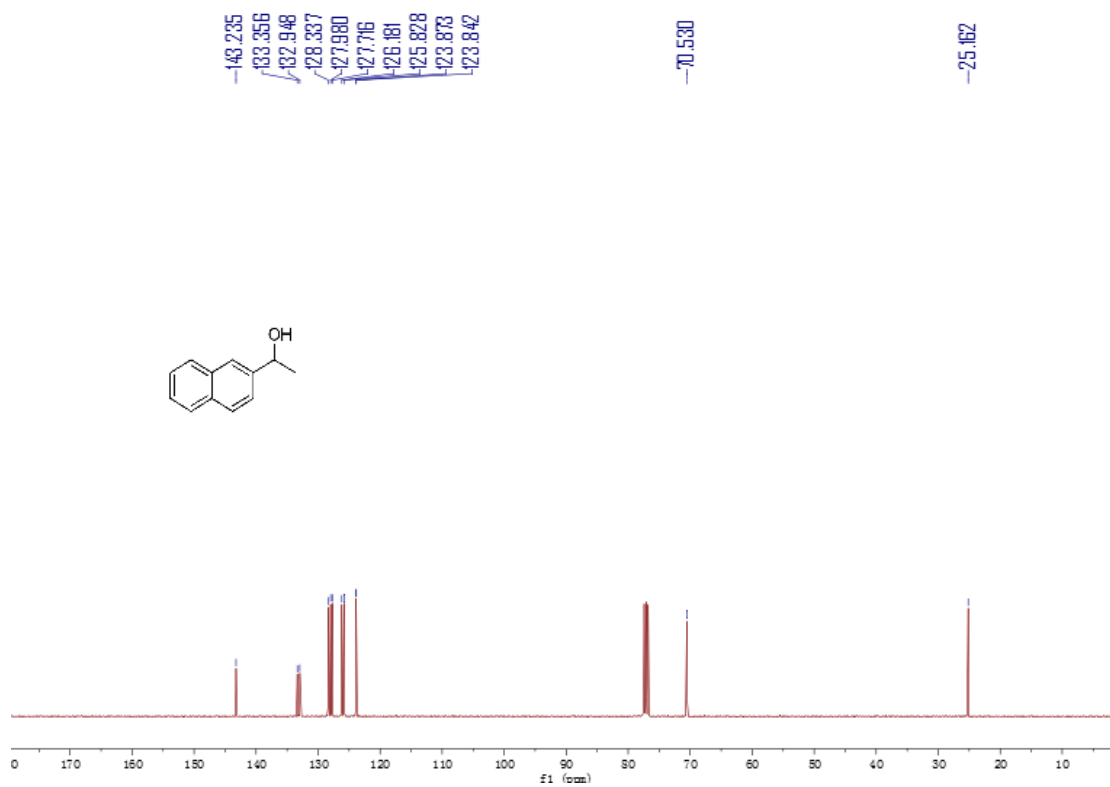

Figure S63.  $^{13}\text{C}$  NMR spectrum of 1-(naphthalen-2-yl)ethan-1-ol in CDCl<sub>3</sub>.

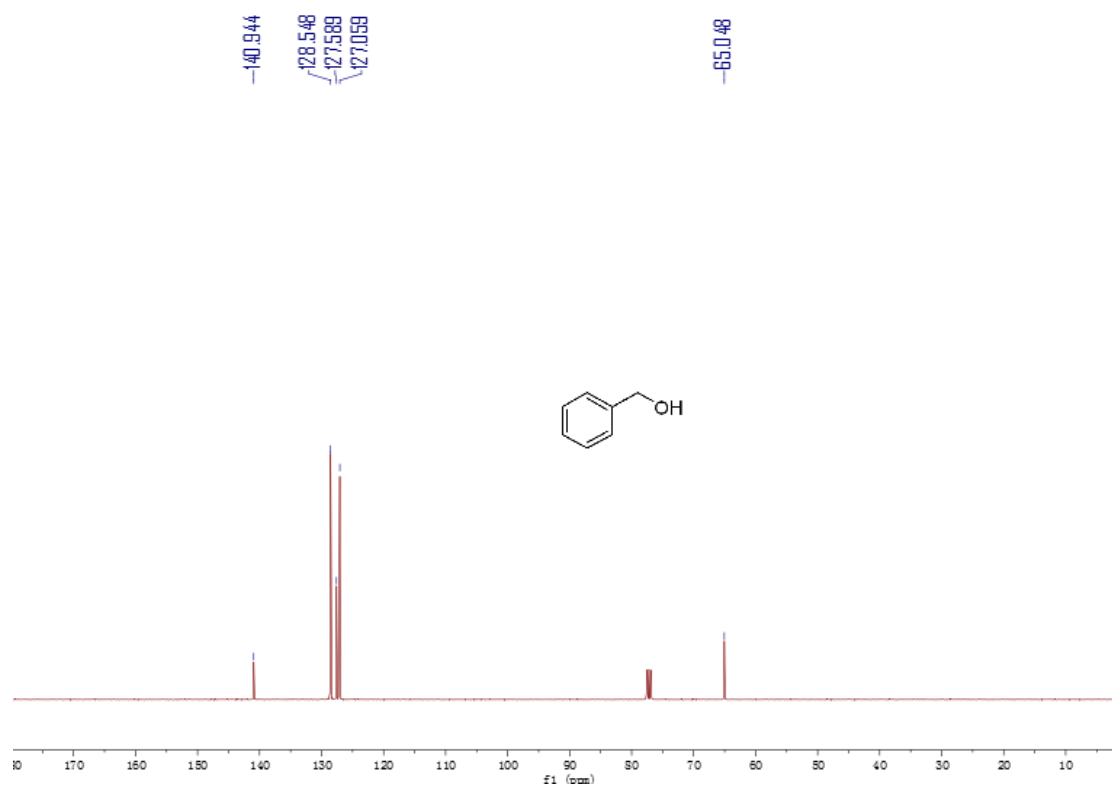

Figure S64.  $^{13}\text{C}$  NMR spectrum of phenylmethanol in  $\text{CDCl}_3$ .

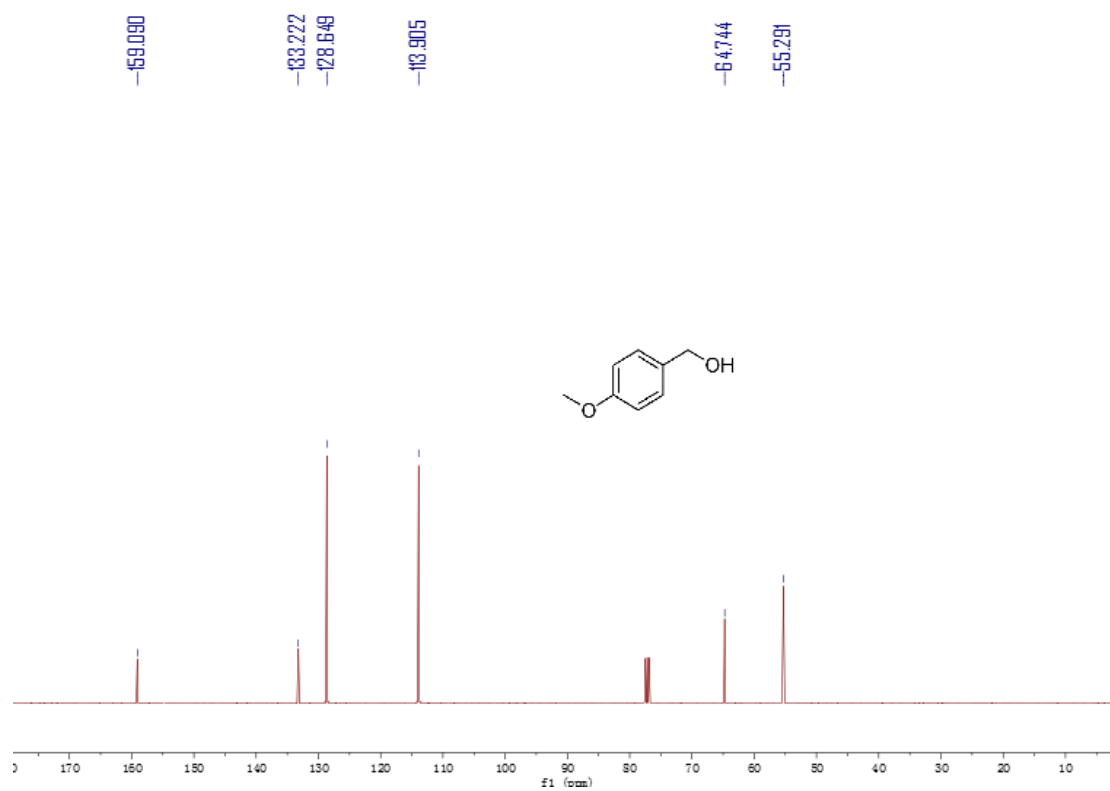

Figure S65.  $^{13}\text{C}$  NMR spectrum of (4-methoxyphenyl)methanol in  $\text{CDCl}_3$ .

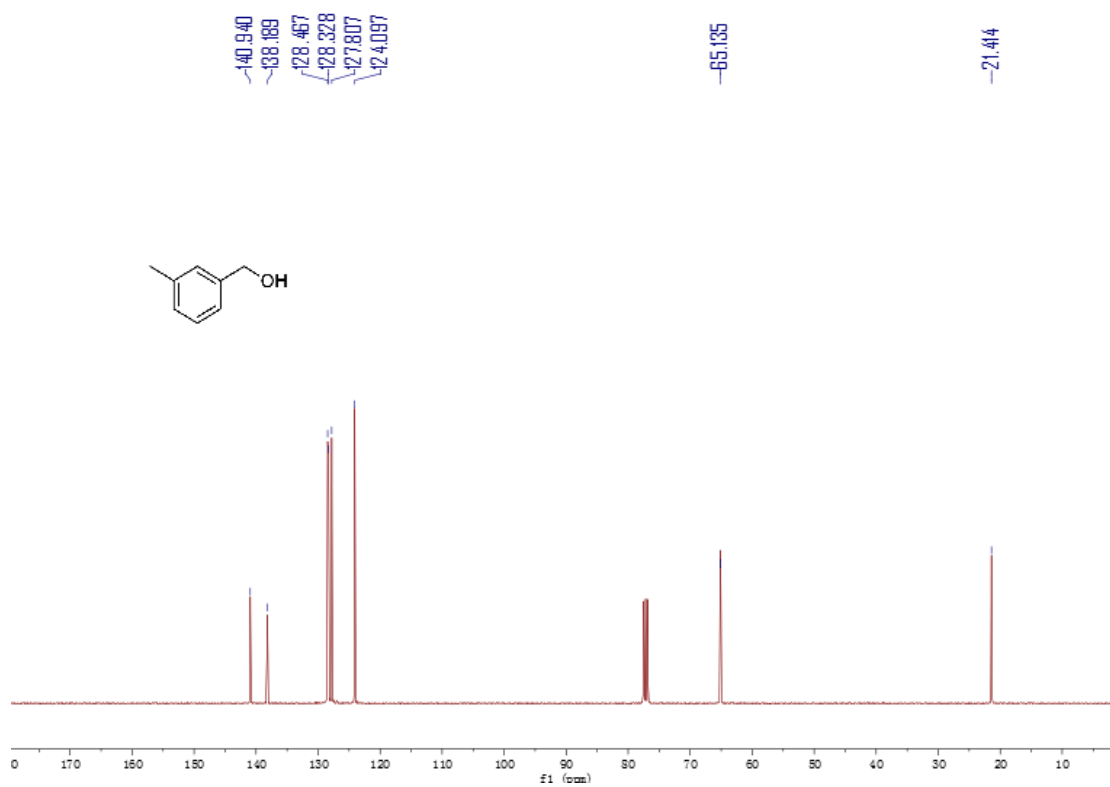

Figure S66.  $^{13}\text{C}$  NMR spectrum of m-tolylmethanol in CDCl<sub>3</sub>.

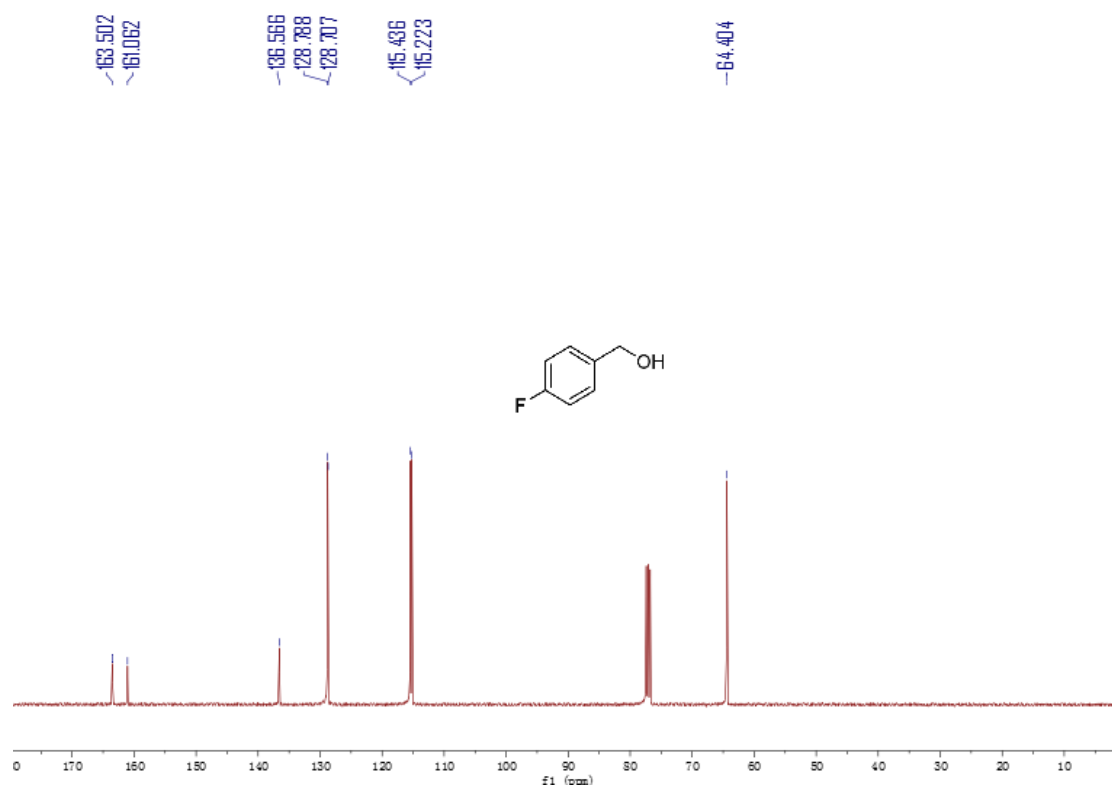

Figure S67.  $^{13}\text{C}$  NMR spectrum of (4-fluorophenyl)methanol in  $\text{CDCl}_3$ .

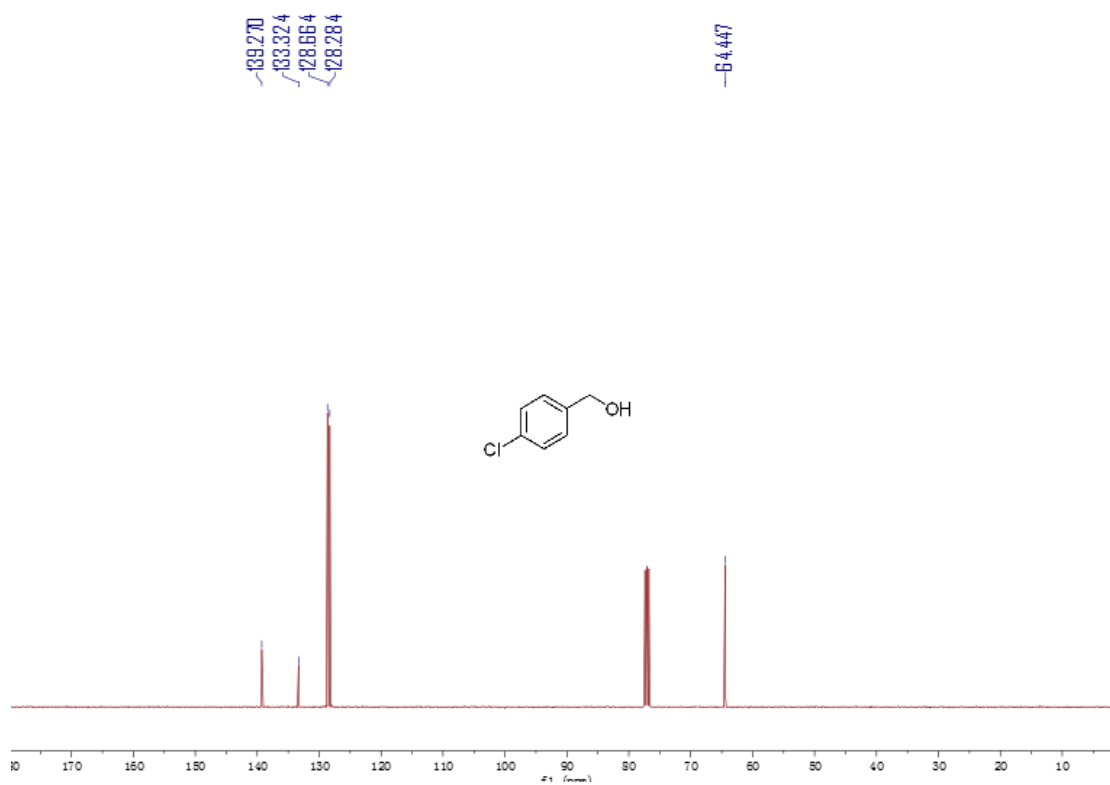

Figure S68.  $^{13}\text{C}$  NMR spectrum of (4-chlorophenyl)methanol in  $\text{CDCl}_3$ .

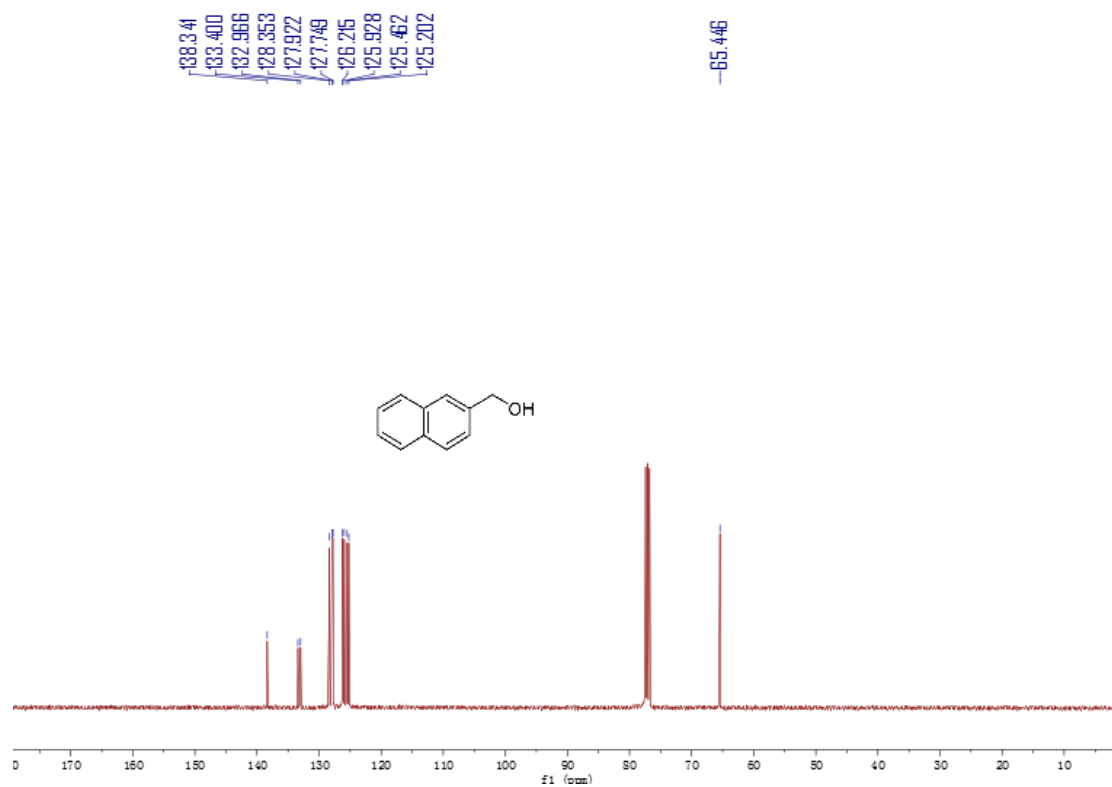

Figure S69. <sup>13</sup>C NMR spectrum of naphthalen-2-ylmethanol in CDCl<sub>3</sub>.

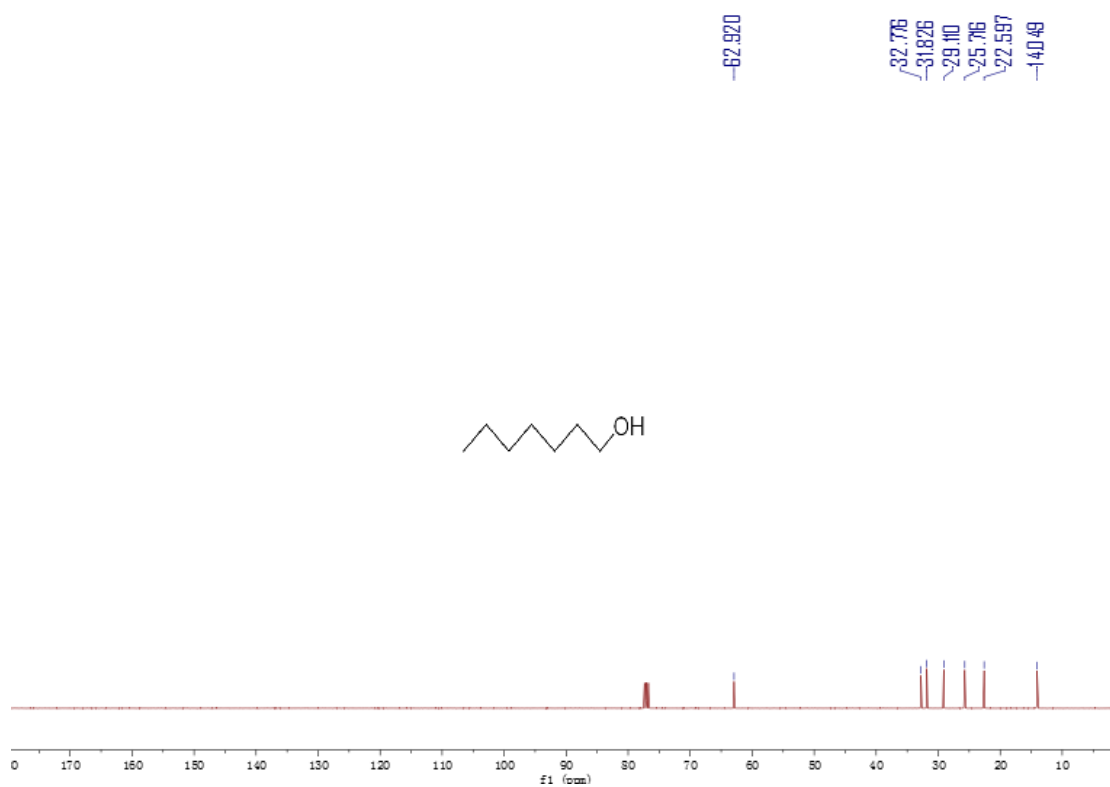

Figure S70.  $^{13}\text{C}$  NMR spectrum of heptan-1-ol in  $\text{CDCl}_3$ .



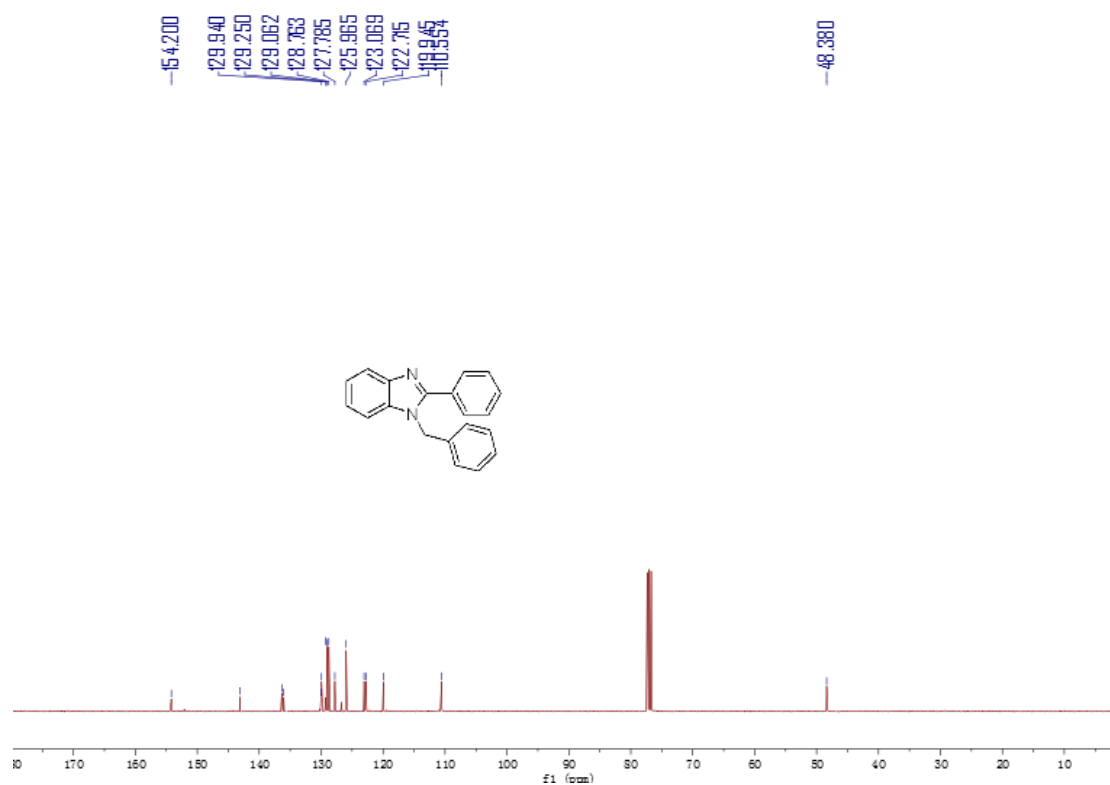

Figure S71. <sup>13</sup>C NMR spectrum of 1-benzyl-2-phenyl-1H-benzo[d]imidazole in CDCl<sub>3</sub>.

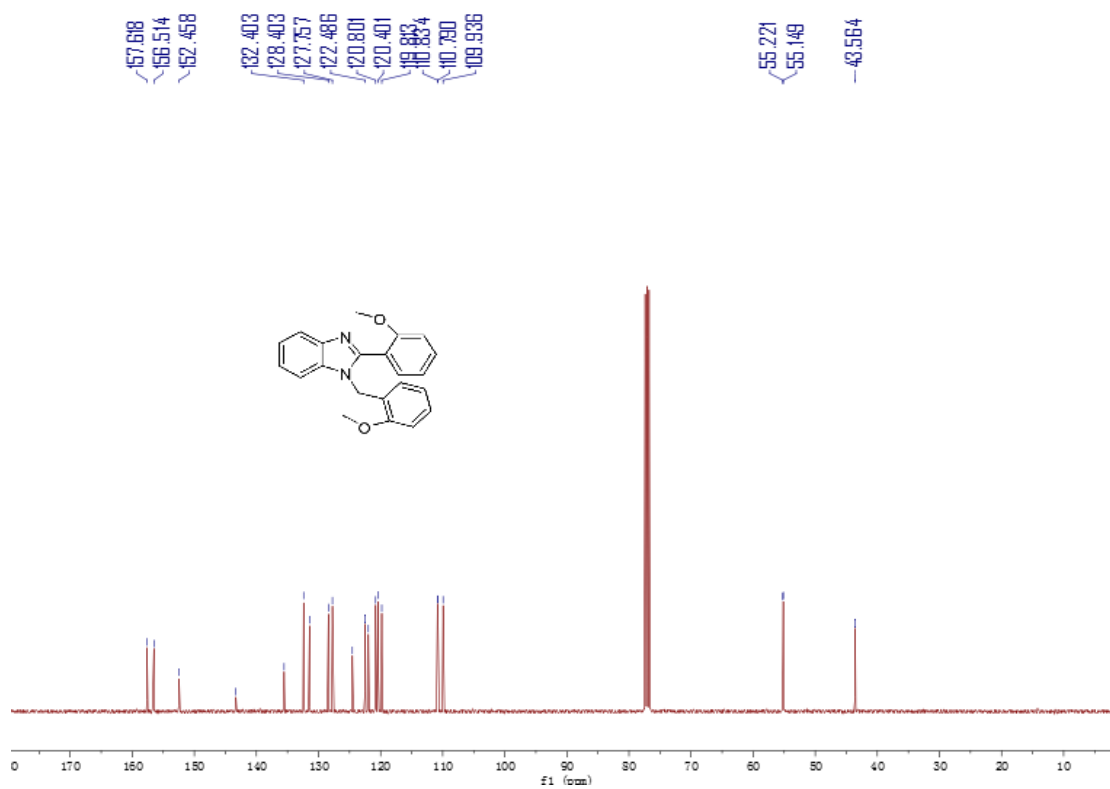

Figure S72. <sup>13</sup>C NMR spectrum of 1-(2-methoxybenzyl)-2-(2-methoxyphenyl)-1H-benzo[d]imidazole in CDCl<sub>3</sub>.

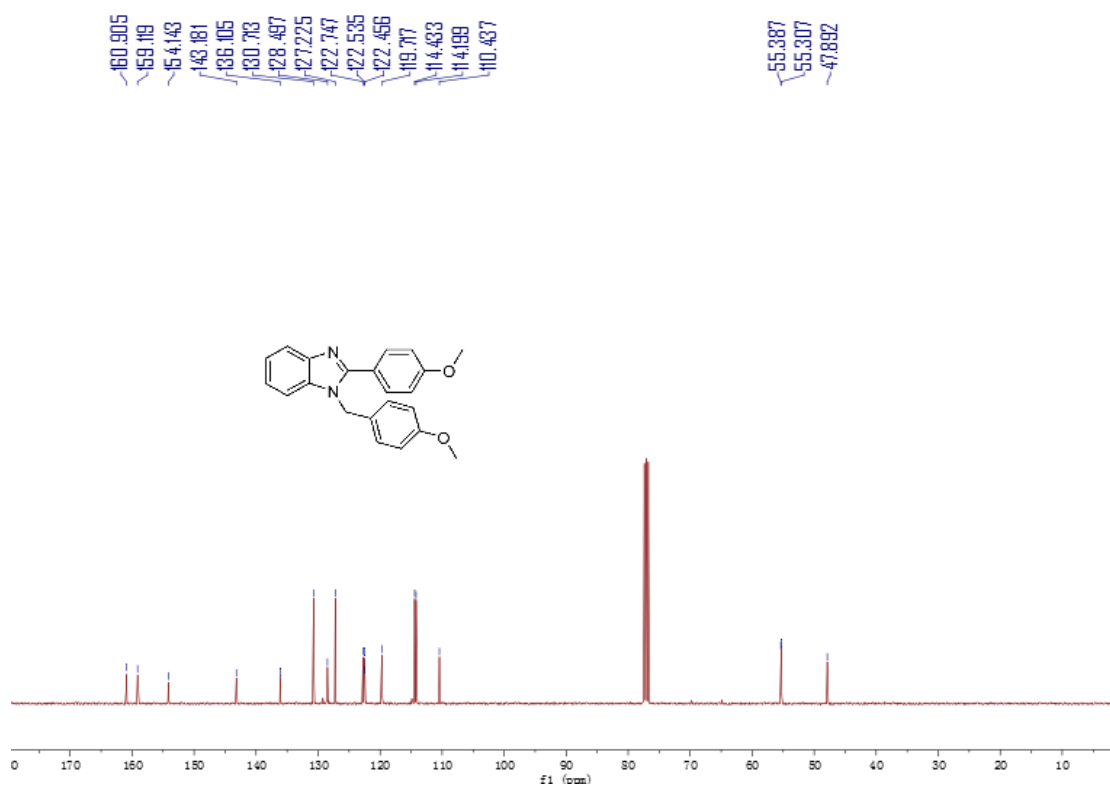

Figure S73. <sup>13</sup>C NMR spectrum of 1-(4-methoxybenzyl)-2-(4-methoxyphenyl)-1H-benzo[d]imidazole in CDCl<sub>3</sub>.

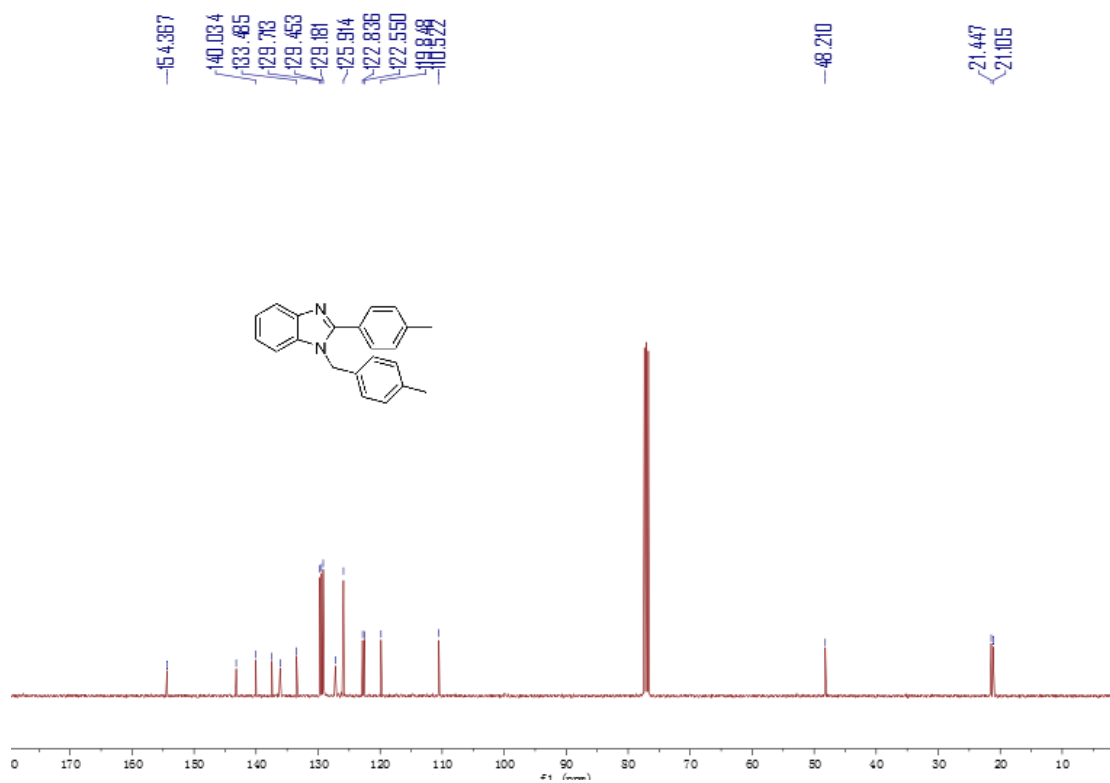

Figure S74. <sup>13</sup>C NMR spectrum of 1-(4-methylbenzyl)-2-(p-tolyl)-1H-benzo[d]imidazole in CDCl<sub>3</sub>.

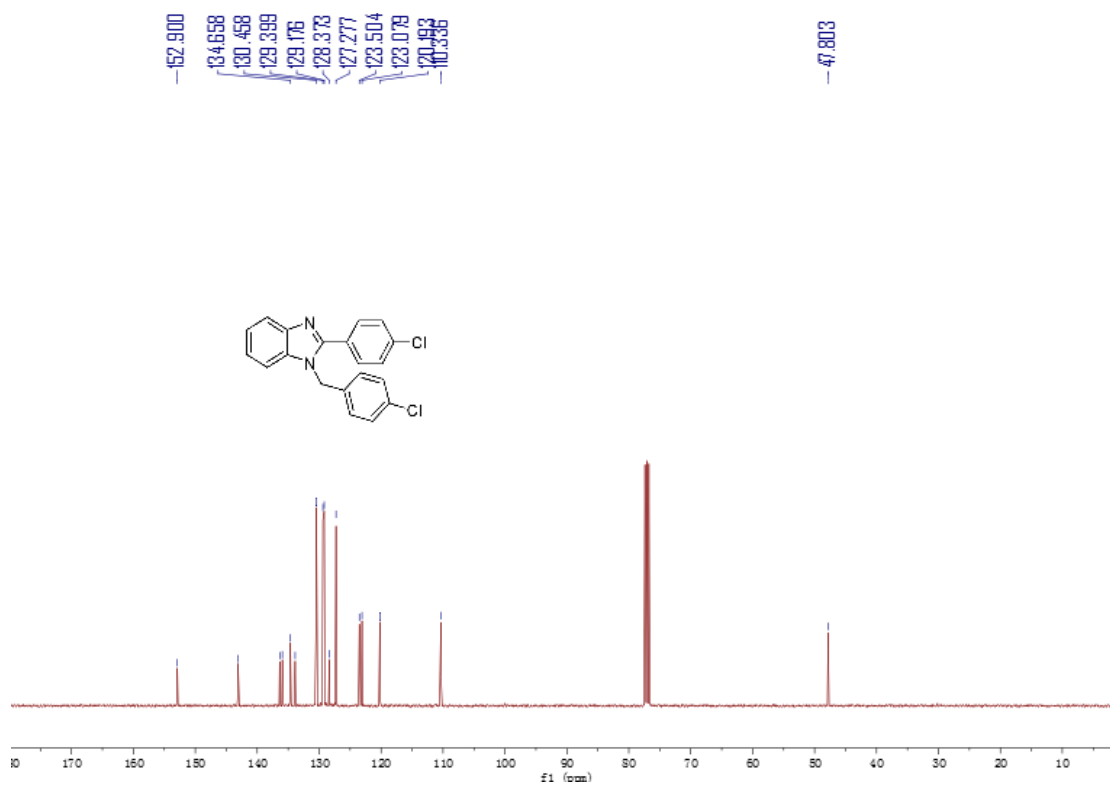

Figure S75. <sup>13</sup>C NMR spectrum of 1-(4-chlorobenzyl)-2-(4-chlorophenyl)-1H-benzo[d]imidazole in CDCl<sub>3</sub>.

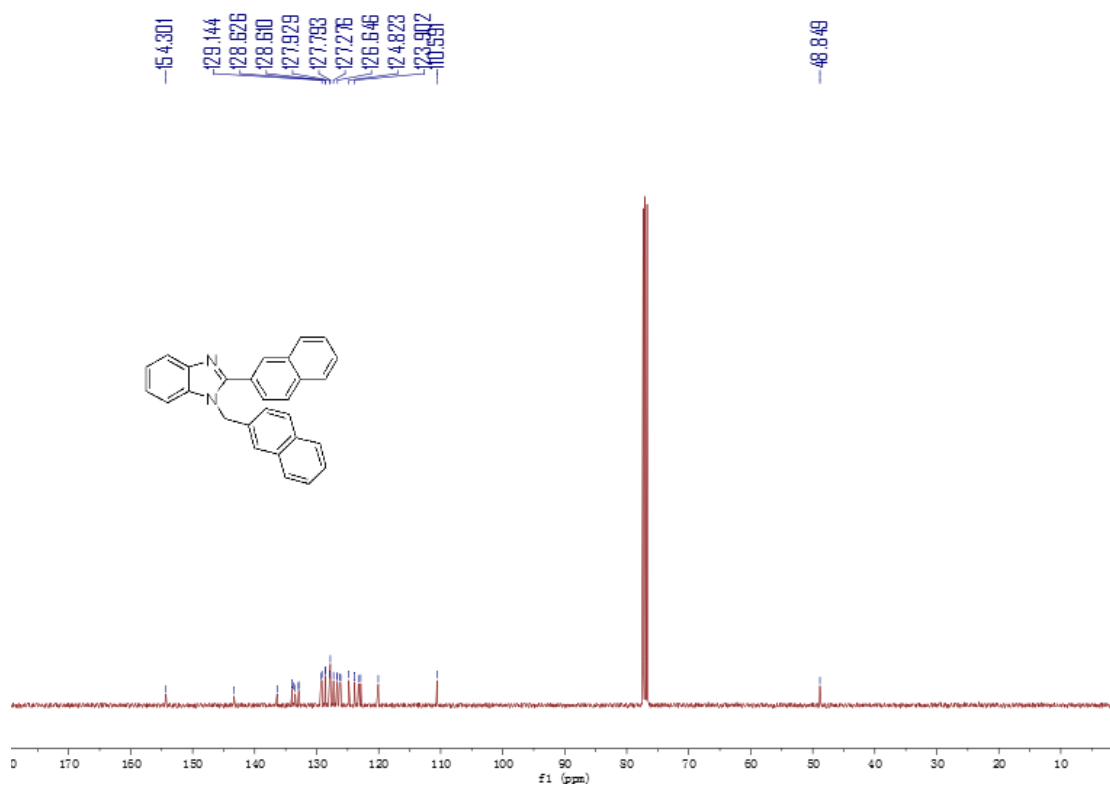

Figure S76. <sup>13</sup>C NMR spectrum of 2-(naphthalen-2-yl)-1-(naphthalen-2-ylmethyl)-1H-benzo[d]imidazole in CDCl<sub>3</sub>.

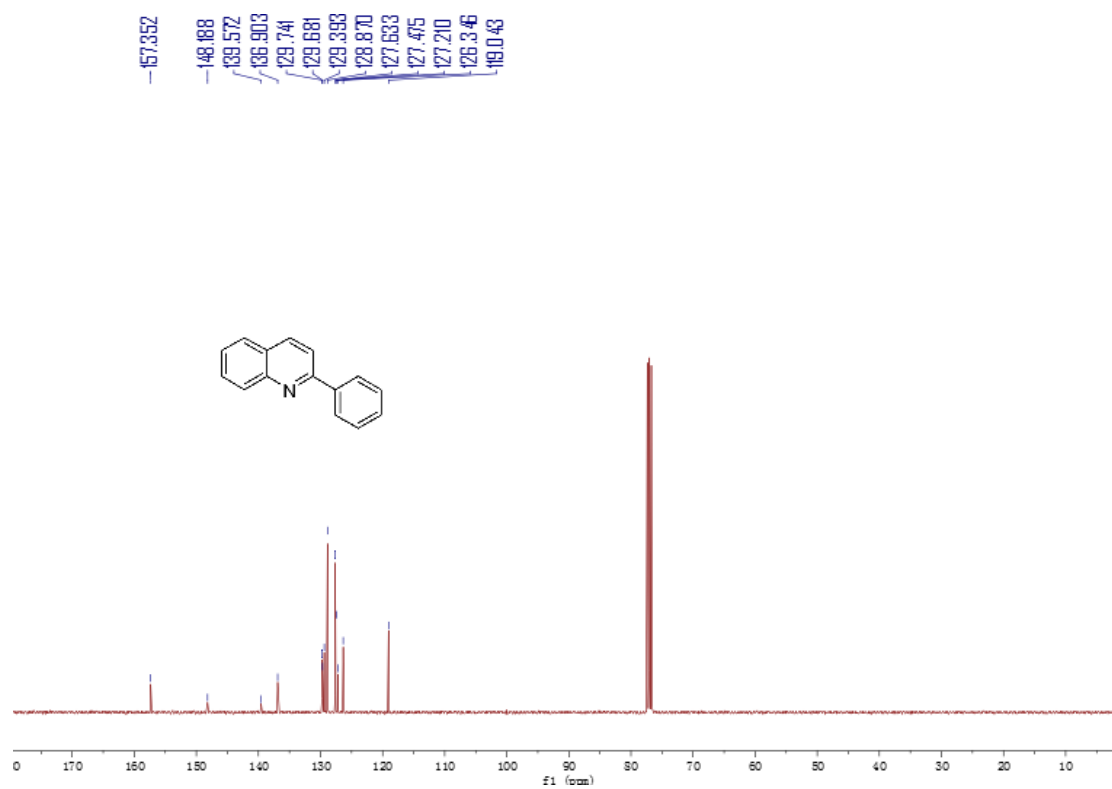

Figure S77. <sup>13</sup>C NMR spectrum of 2-phenylquinoline in CDCl<sub>3</sub>.

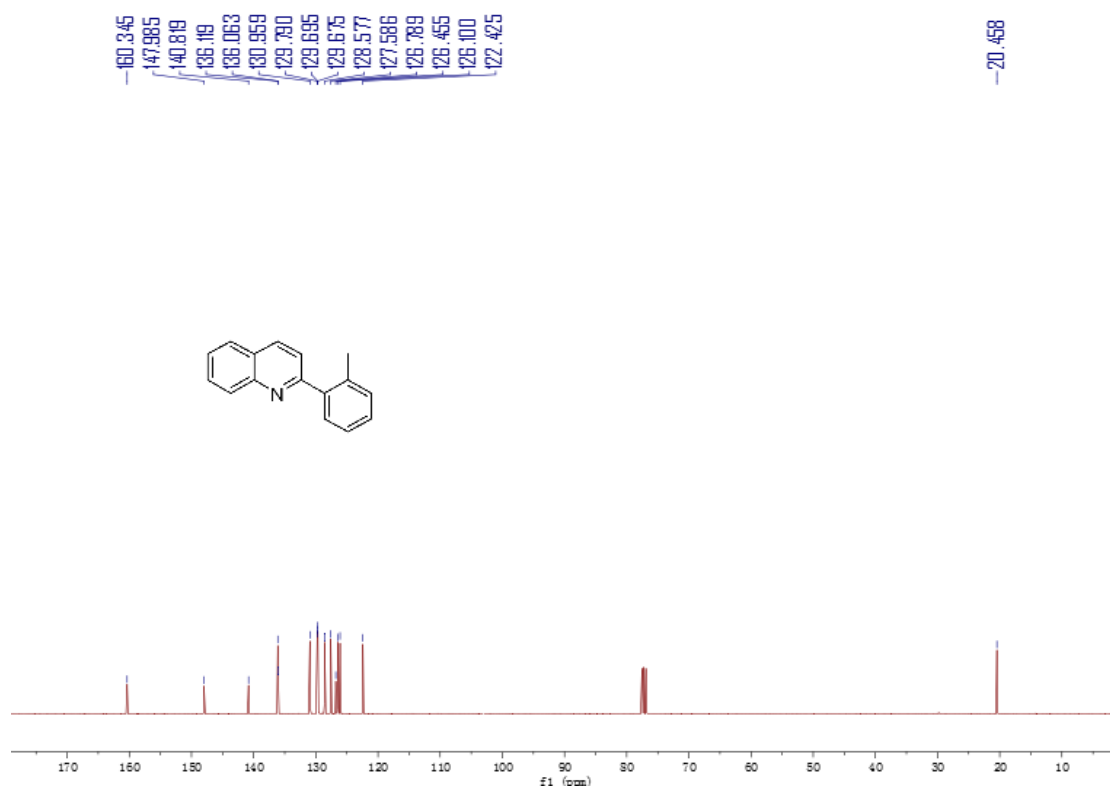

Figure S78. <sup>13</sup>C NMR spectrum of 2-(o-tolyl)quinoline in CDCl<sub>3</sub>.



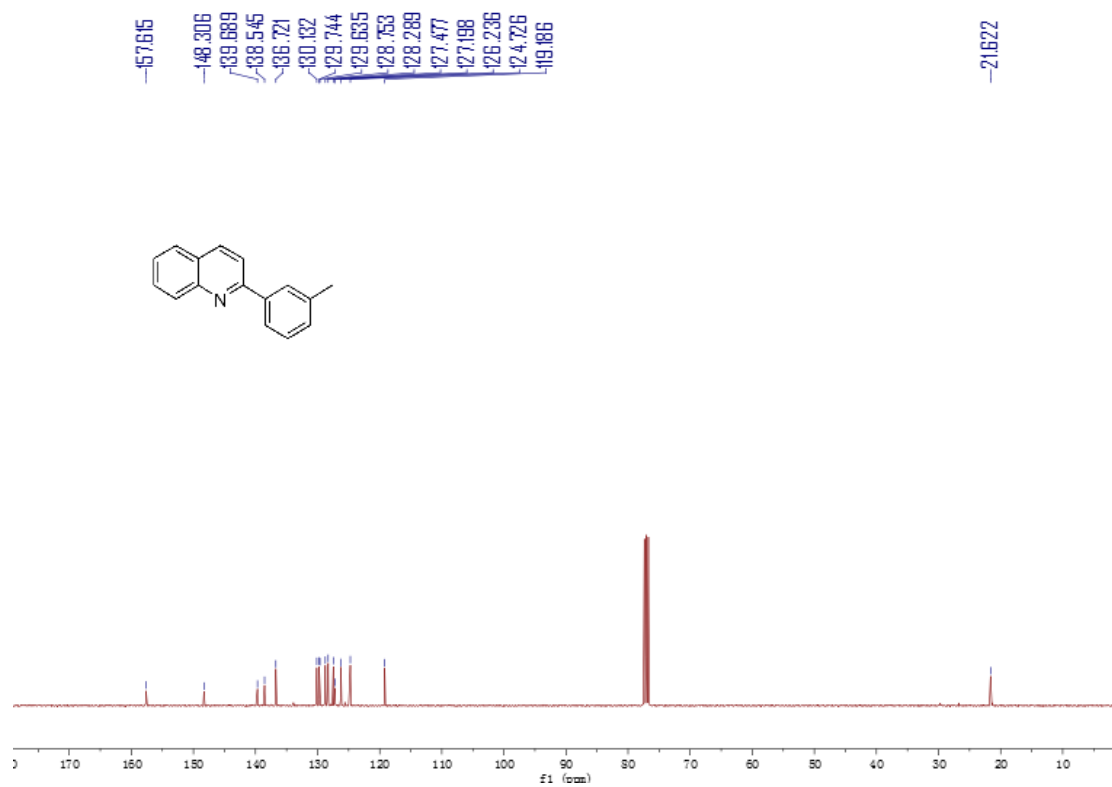

Figure S79. <sup>13</sup>C NMR spectrum of 2-(m-tolyl)quinoline in CDCl<sub>3</sub>.

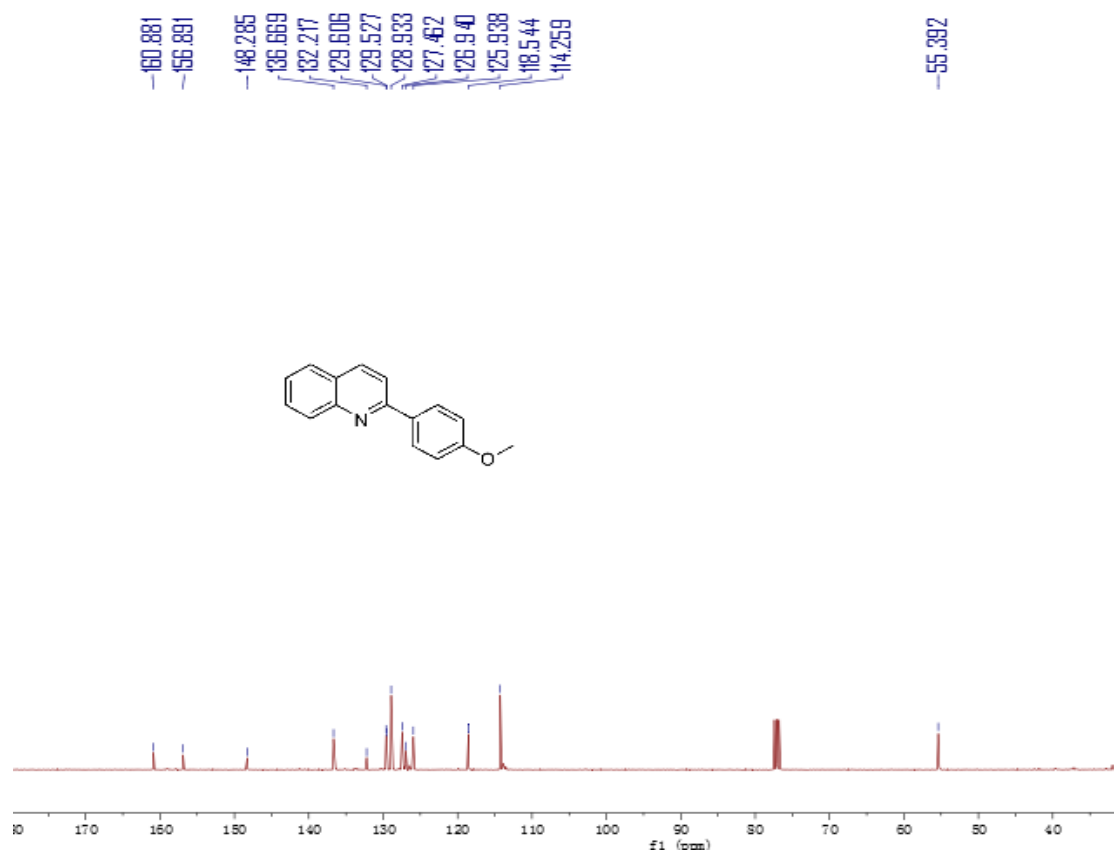

Figure S80. <sup>13</sup>C NMR spectrum of 2-(4-methoxyphenyl)quinoline in CDCl<sub>3</sub>.

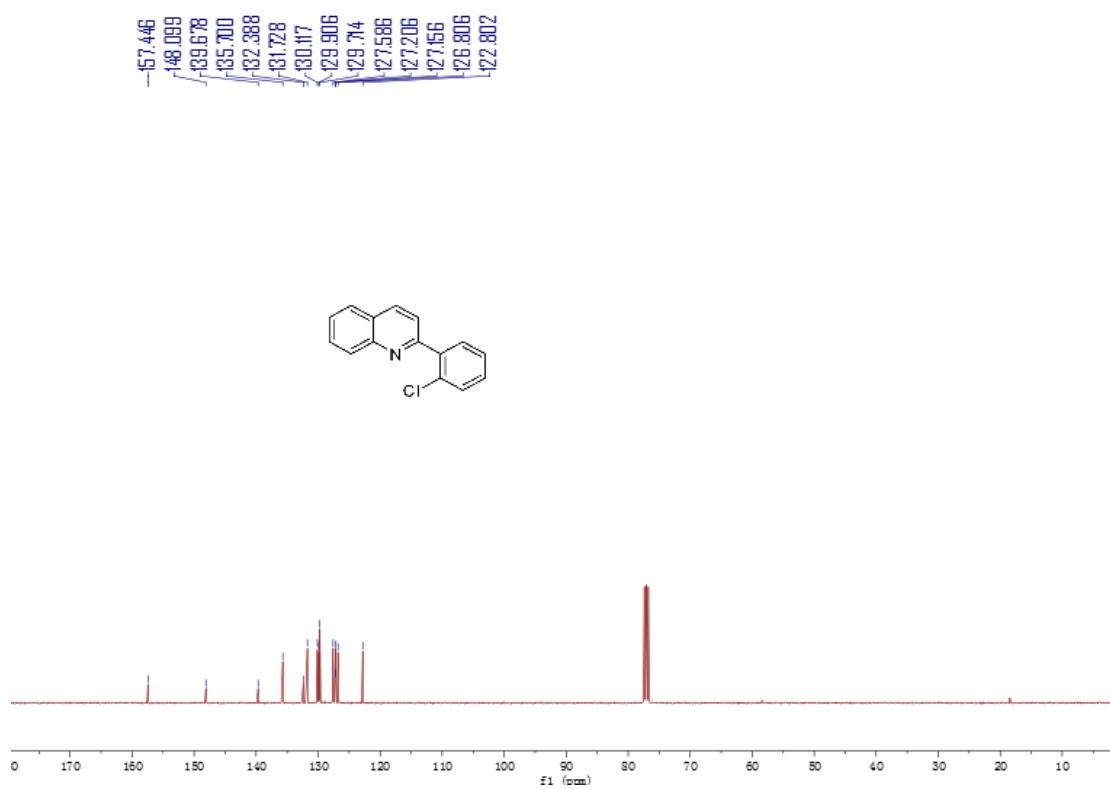

Figure S81. <sup>13</sup>C NMR spectrum of 2-(2-chlorophenyl)quinoline in CDCl<sub>3</sub>.

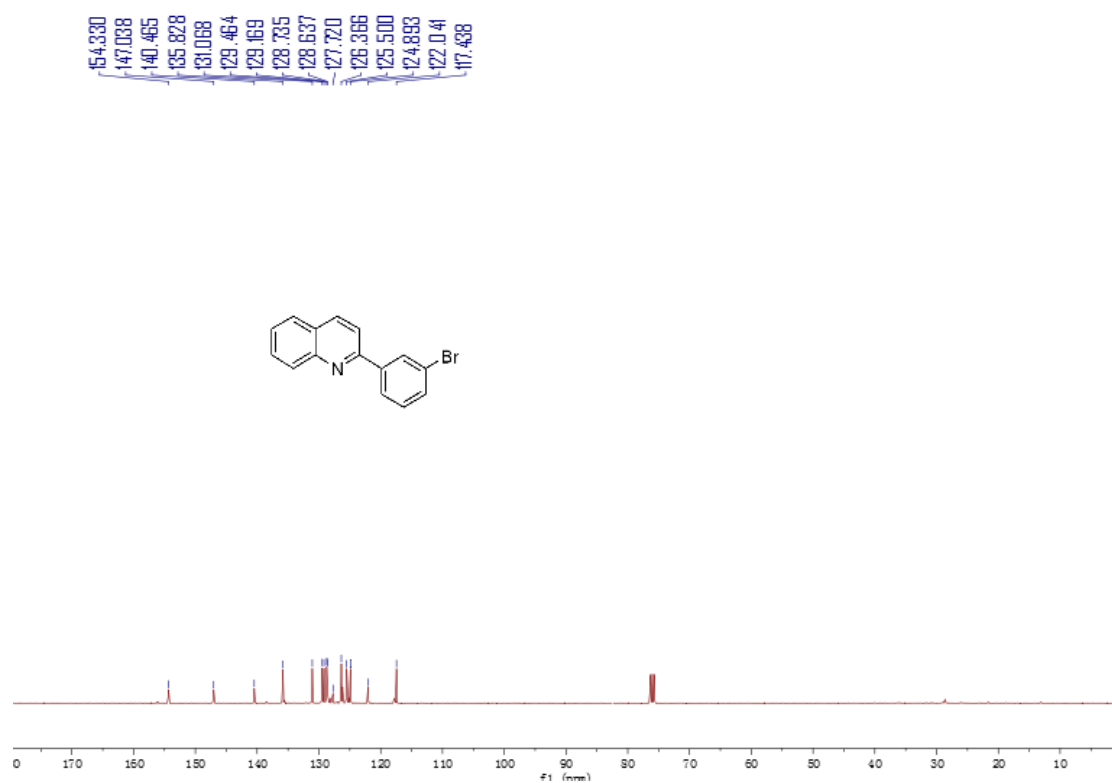

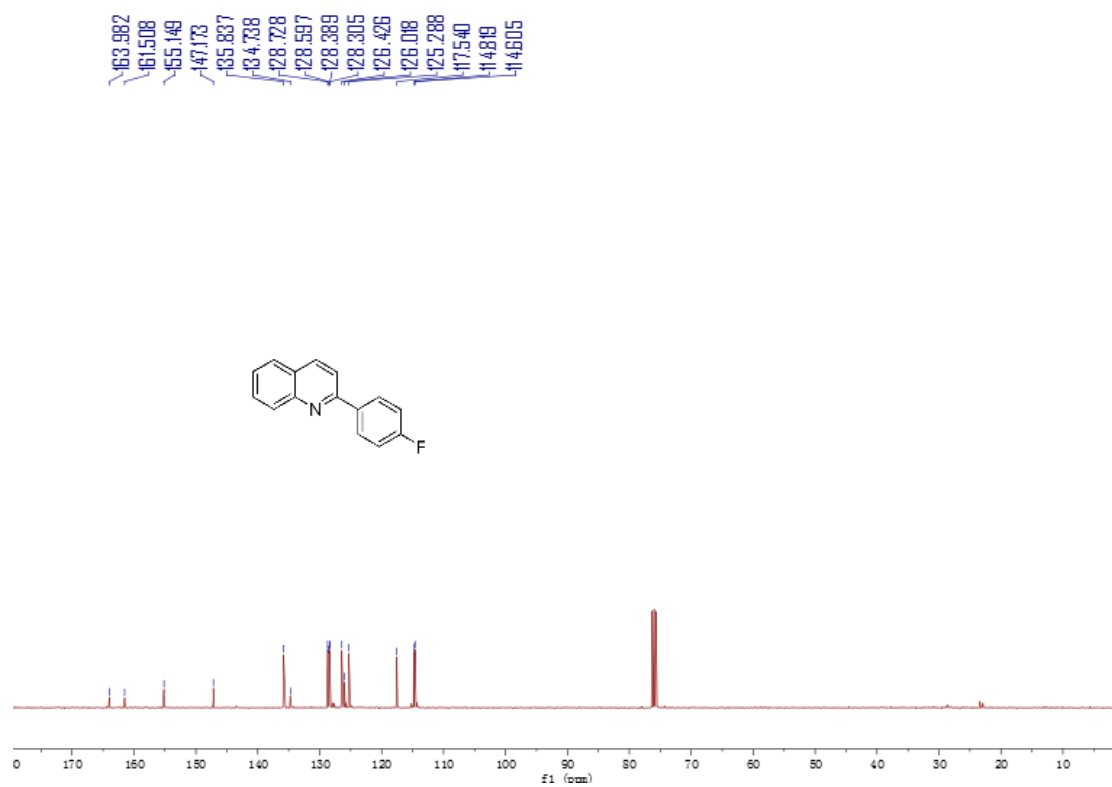

Figure S83. <sup>13</sup>C NMR spectrum of 2-(4-fluorophenyl)quinoline in CDCl<sub>3</sub>.

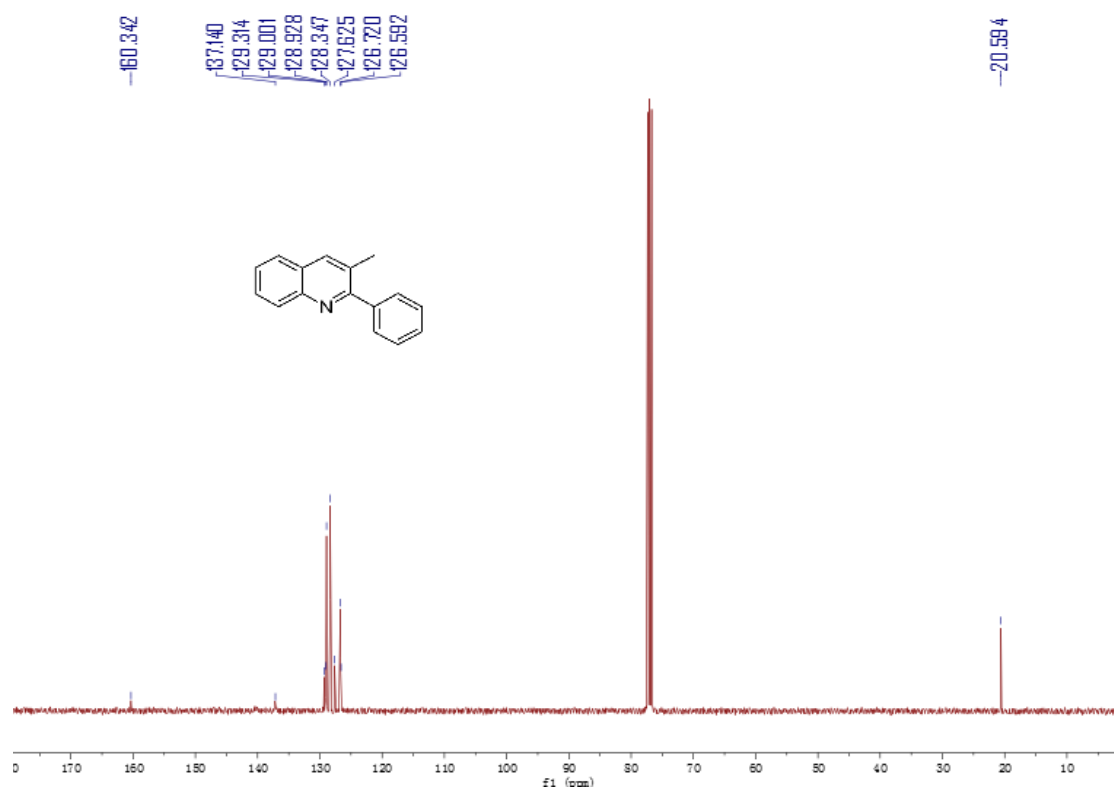

Figure S84. <sup>13</sup>C NMR spectrum of 3-methyl-2-phenylquinoline in CDCl<sub>3</sub>.

## IR Spectra

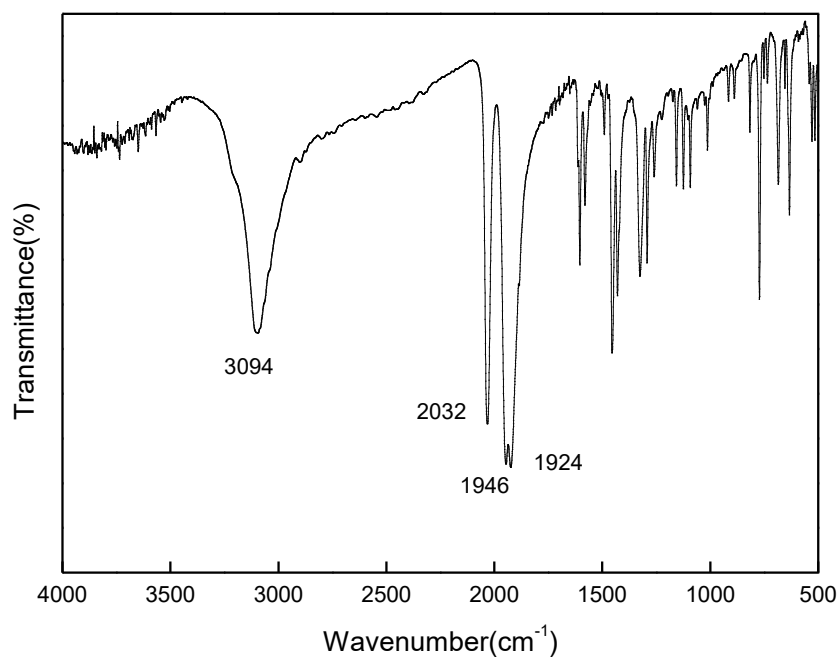

Figure S85. IR spectrum of **1** in KBr.

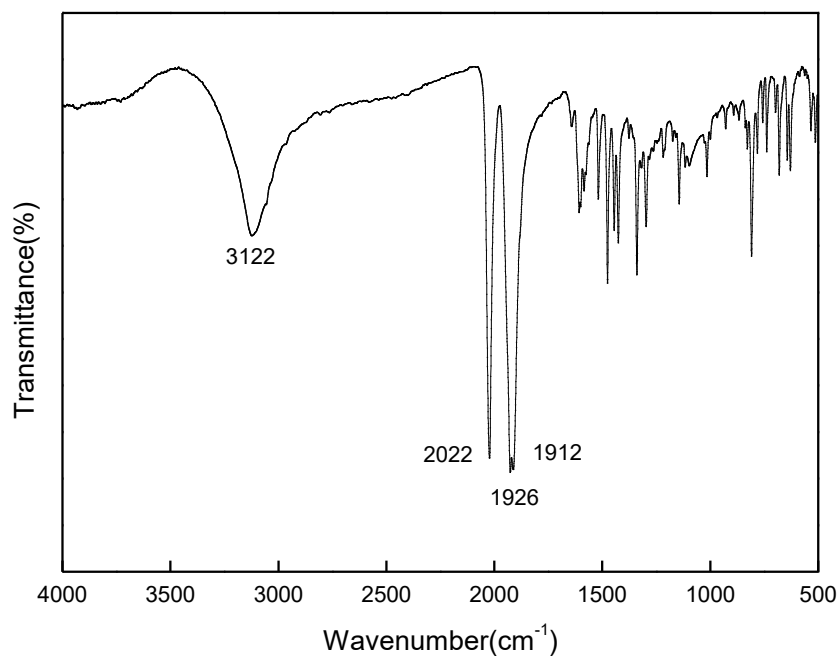

Figure S86. IR spectrum of **2** in KBr.

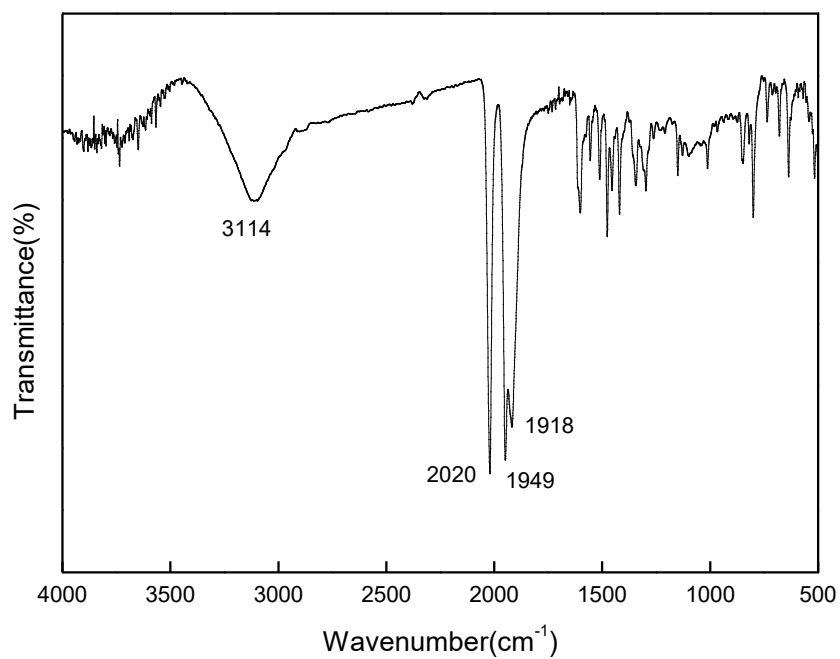

Figure S87. IR spectrum of **3** in KBr.

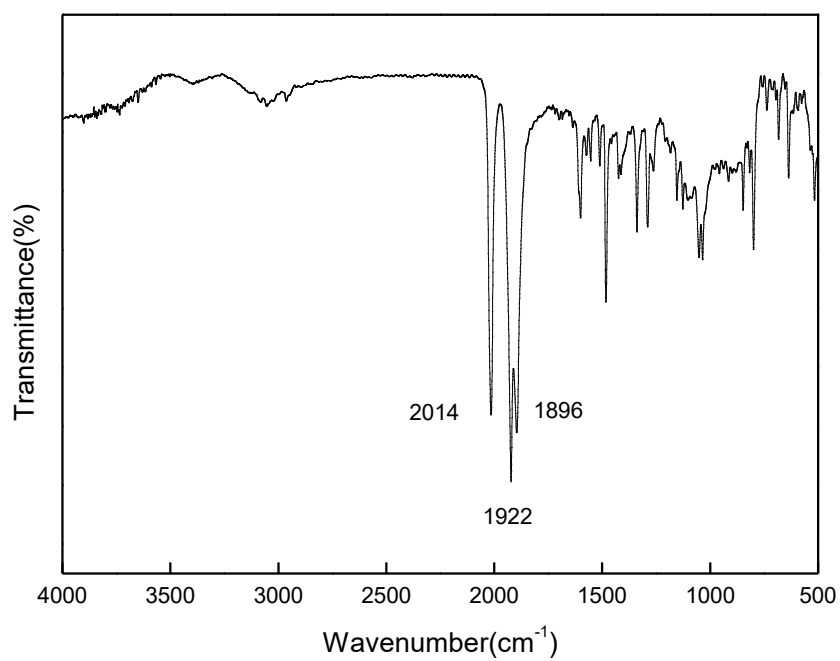

Figure S88. IR spectrum of **4** in KBr.
